# Supplementary material
Source: PubMed Central journal article supplement (PMC4109726)
Supplement: NIHMS586714-supplement-1.pdf [file NIHMS586714-supplement-1.pdf]

## Supplementary Figures

### Supplementary Figure 1: Correlation between protein and mRNA

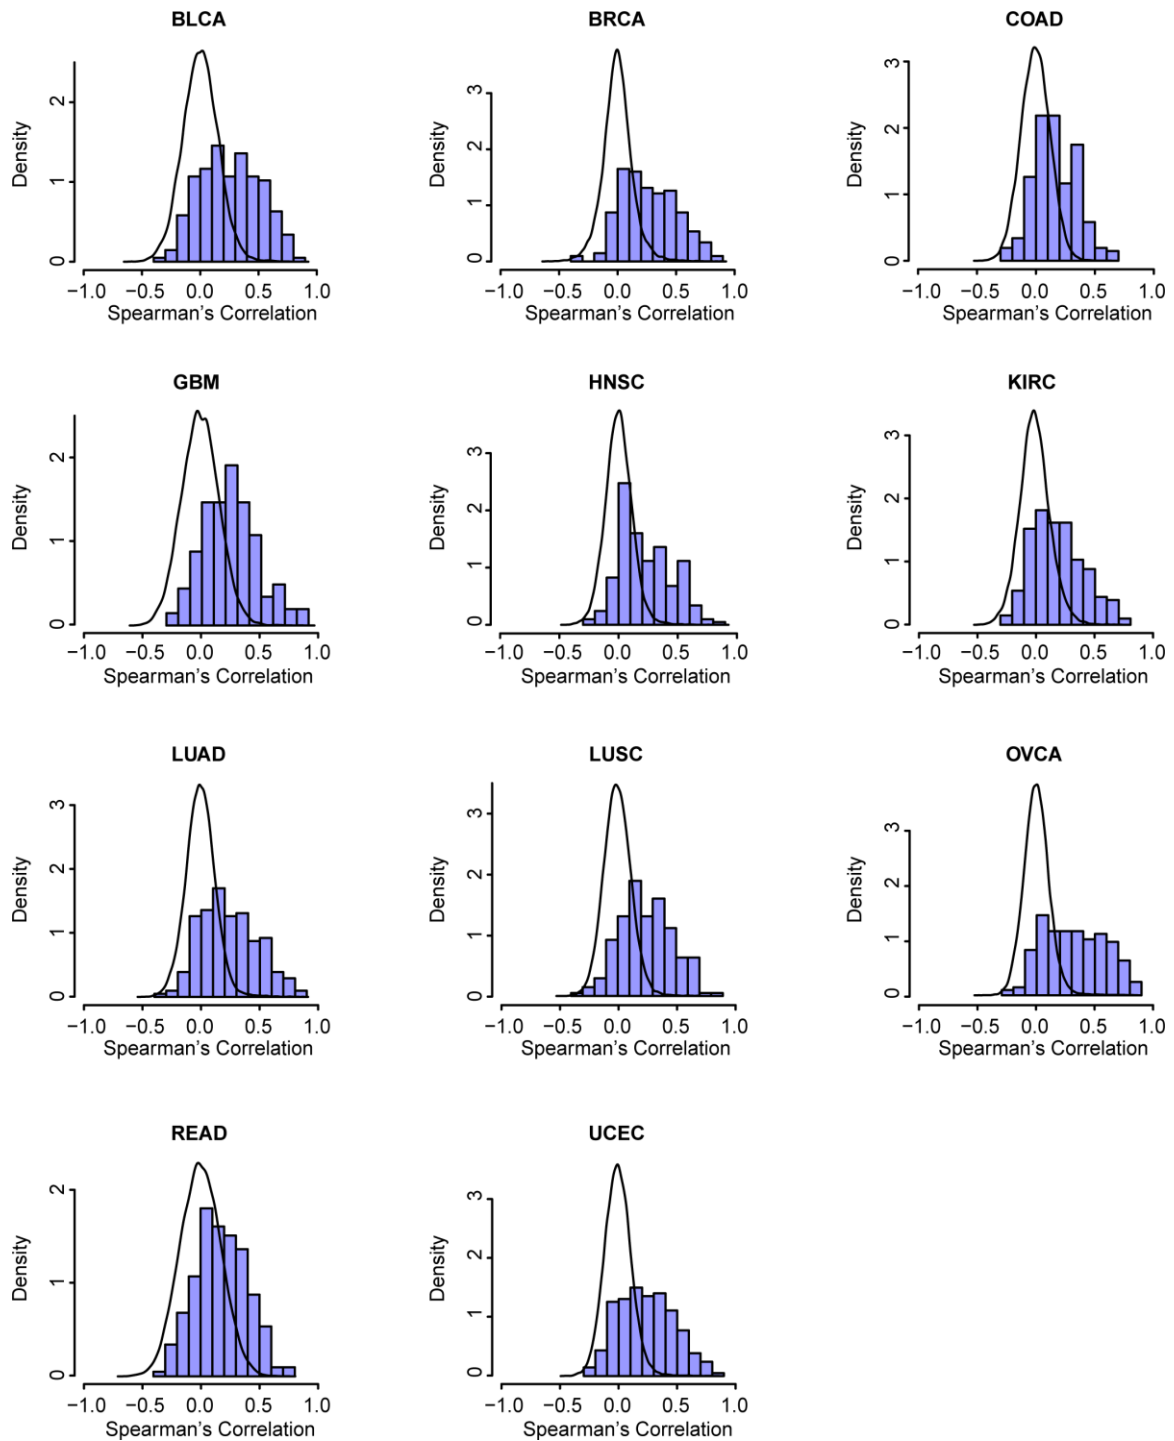

Eleven histograms of Spearman's correlation ( $\rho$ ) in 206 pairs of proteins and matched mRNA across all tumor lineages. The black curve represents the background of  $\rho$  using 28,960 random pairs of (matched or unmatched) proteins and mRNA in the same dataset. Tumor lineage is indicated above each histogram.

**Supplementary Figure 2: Dotplot showing relative HER2 protein and ERBB2 mRNA expression levels in 26 LUAD cell lines<sup>1</sup>**

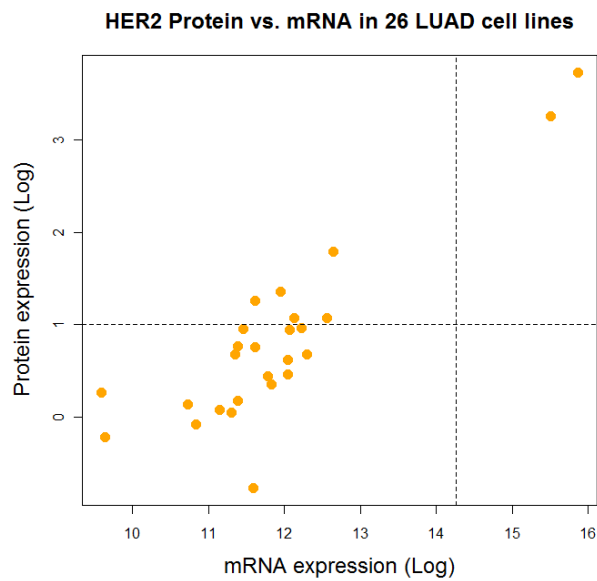

The cutoffs used in Fig. 1 of 14.26 for mRNA and 1.0 for protein are shown by the vertical and horizontal dashed lines, respectively. The thresholds were chosen based on breast cancer HER2 positive samples. Using the same cutoffs, more cell lines are identified as HER2 positive by protein (7 cell lines) than by mRNA (2 cell lines). Spearman's correlation ( $\rho$ ) is 0.77 between mRNA and protein expressions. Supplementary Table 1 shows the actual values and cell line names.

**Supplementary Figure 3: Smoking history and TP53 mutation status of samples in cluster\_F**

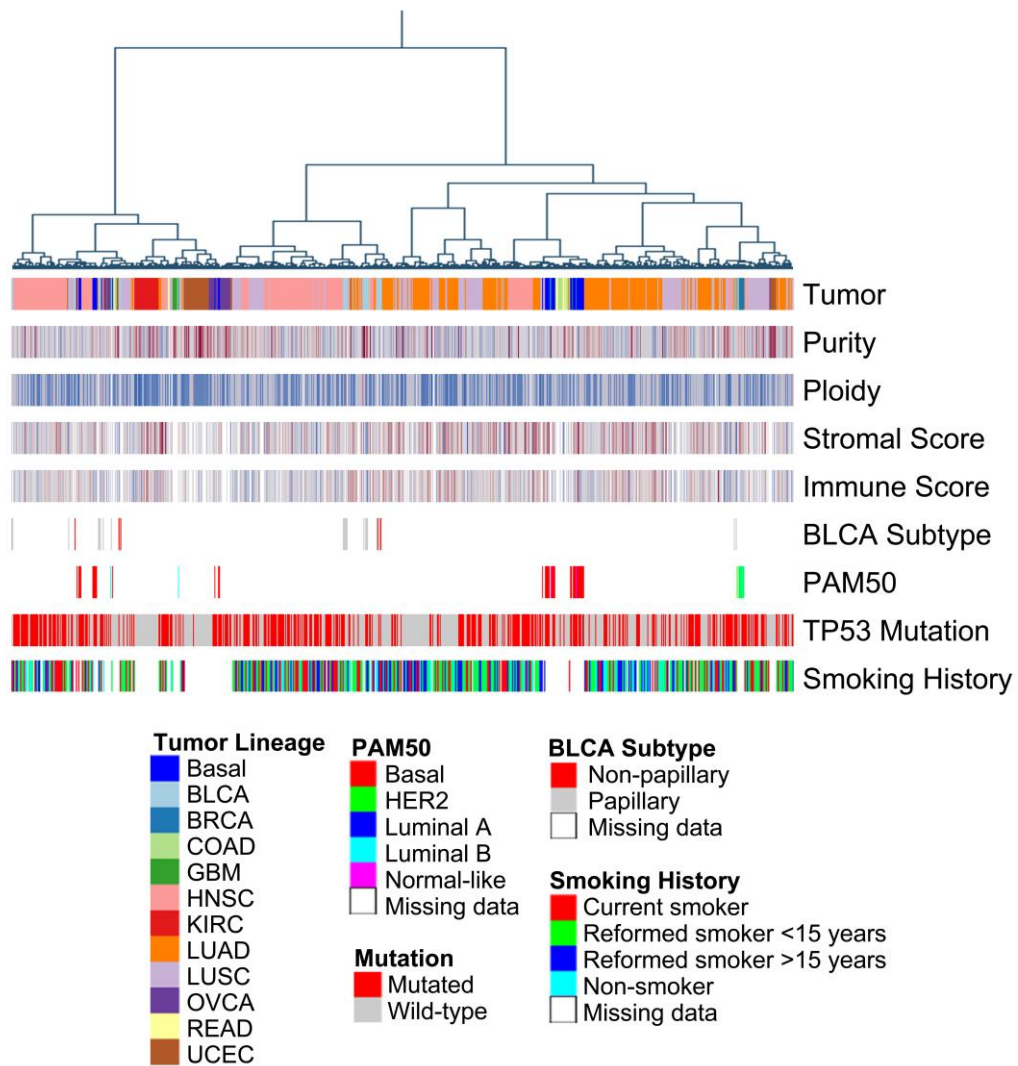

Zoomed-in view of cluster\_F. Horizontally, samples are arranged as shown in the overall RBN heatmap (Fig. 2a). Smoking history and TP53 mutation status as well as a number of molecular/clinical variables are highlighted.

**Supplementary Figure 4: Zoomed-in views of RBN and MC clusters showing association with tumor types**

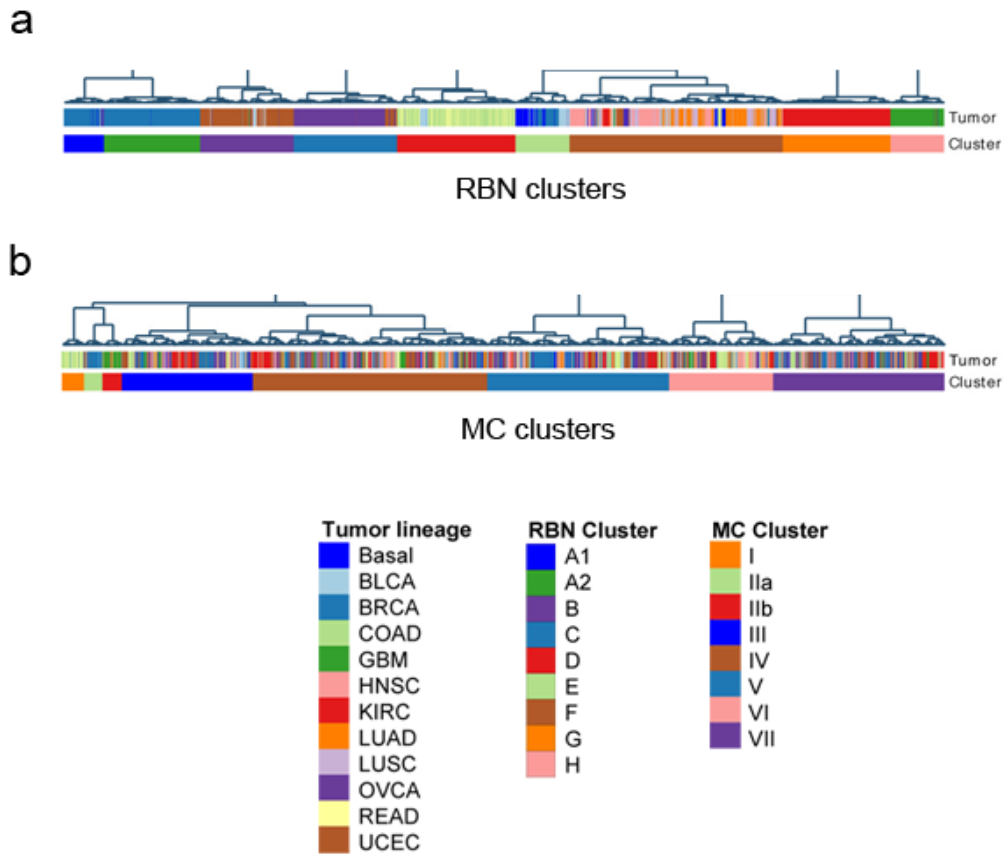

(a) Zoomed-in view of RBN clusters, showing good correspondence between the clusters and the tumor lineages. (b) Zoomed-in view of MC clusters, showing that the tumor lineages are distributed across the clusters. Virtually no cluster is dominant by a single tumor type (except the three left-most clusters as explained in the legend for Supplementary Table 7).

Supplementary Figure 5: LUSC EMT score in MC cluster\_V vs. other clusters

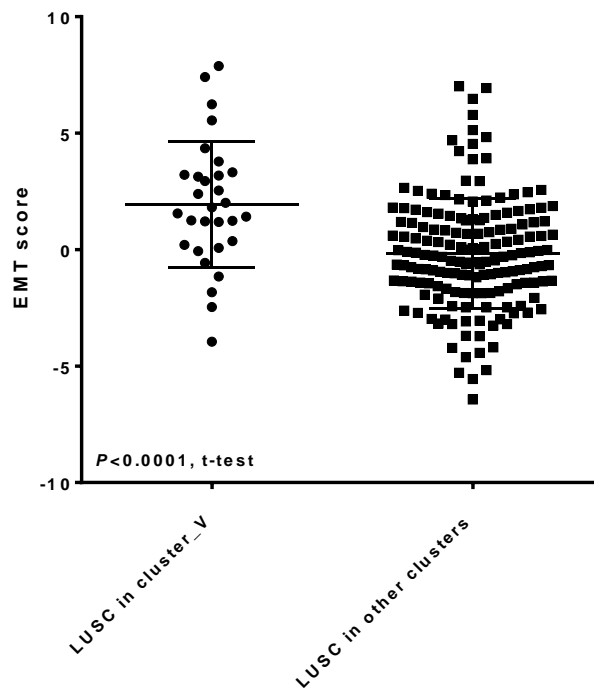

Dotplot shows the EMT score of each LUSC sample in cluster\_V and in other clusters in the MC dataset. The lines indicate the mean  $\pm$ S.D. of EMT score. t-test shows that the LUSC samples in cluster\_V have a higher EMT signature than other LUSC samples ( $P < 0.0001$ , t-test).

**Supplementary Figure 6: Heatmaps showing pathway members and associated proteins and molecular/ clinical variables with pathway scores (RBN dataset by cluster)**

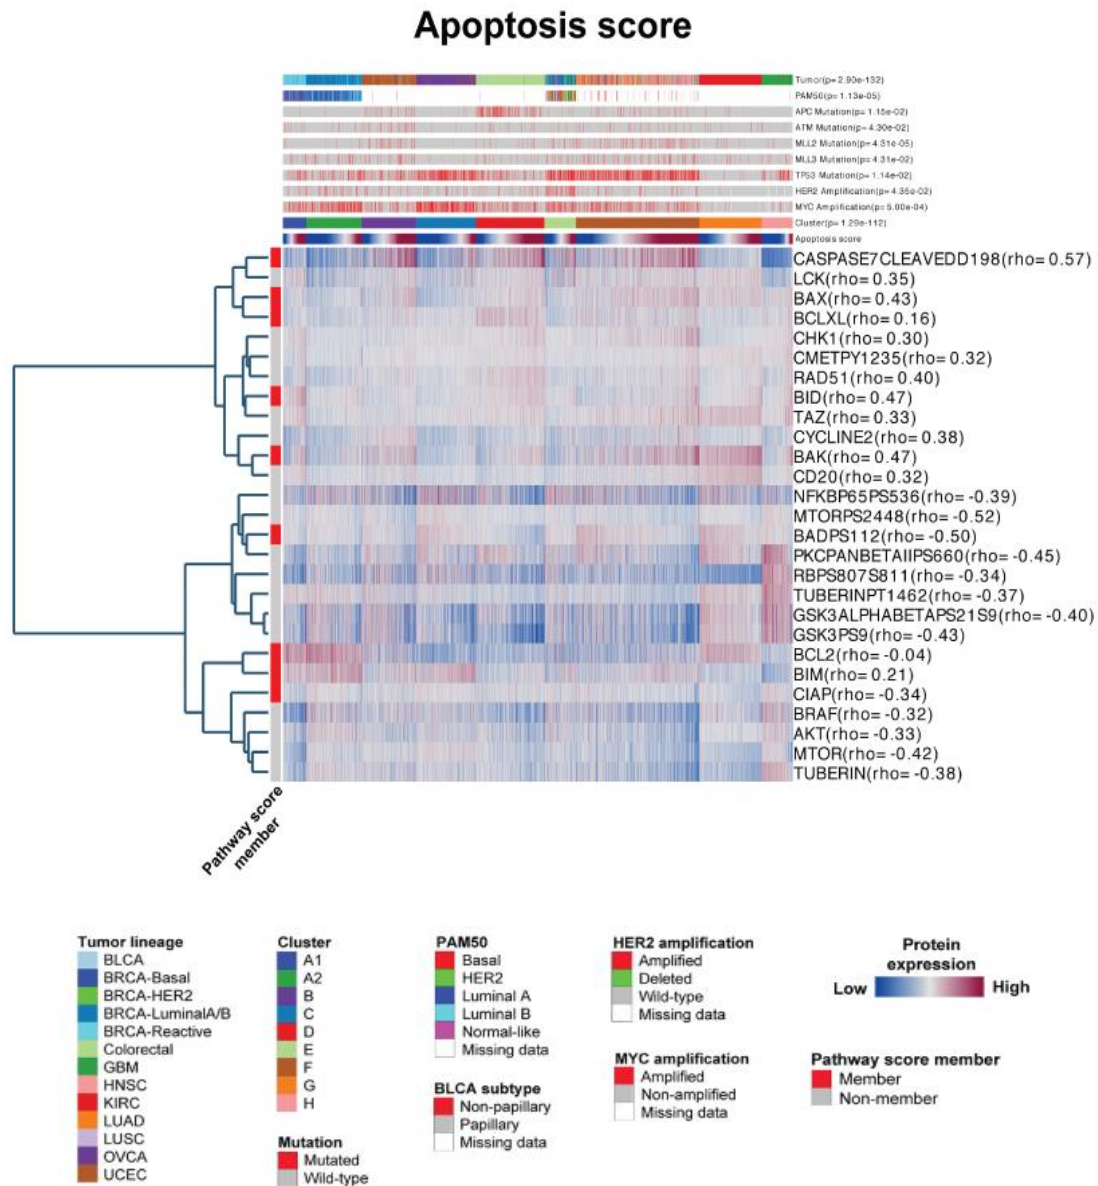

The pathways included are (in consecutive order) Apoptosis, Cell cycle, DNA damage response, EMT, Hormone\_a, Hormone\_b, PI3K/Akt, Ras/MAPK, RTK and TSC/mTOR. Heatmaps depict the protein levels of the pathway members and proteins with a high correlation ( $\rho > 0.3$  /  $\rho < -0.3$ , Spearman's correlation) to the pathway score. Annotation bars (selected from Fig. 2) are included if statistically associated with the pathway score ( $P$ -values  $< 0.05$ , Kruskal-Wallis test). Pathway members are marked in red on the left hand side. High-resolution images of the heatmap can be found online (<http://bioinformatics.mdanderson.org/main/TCGA/Pancan11/RPPA>).

# Cell cycle score

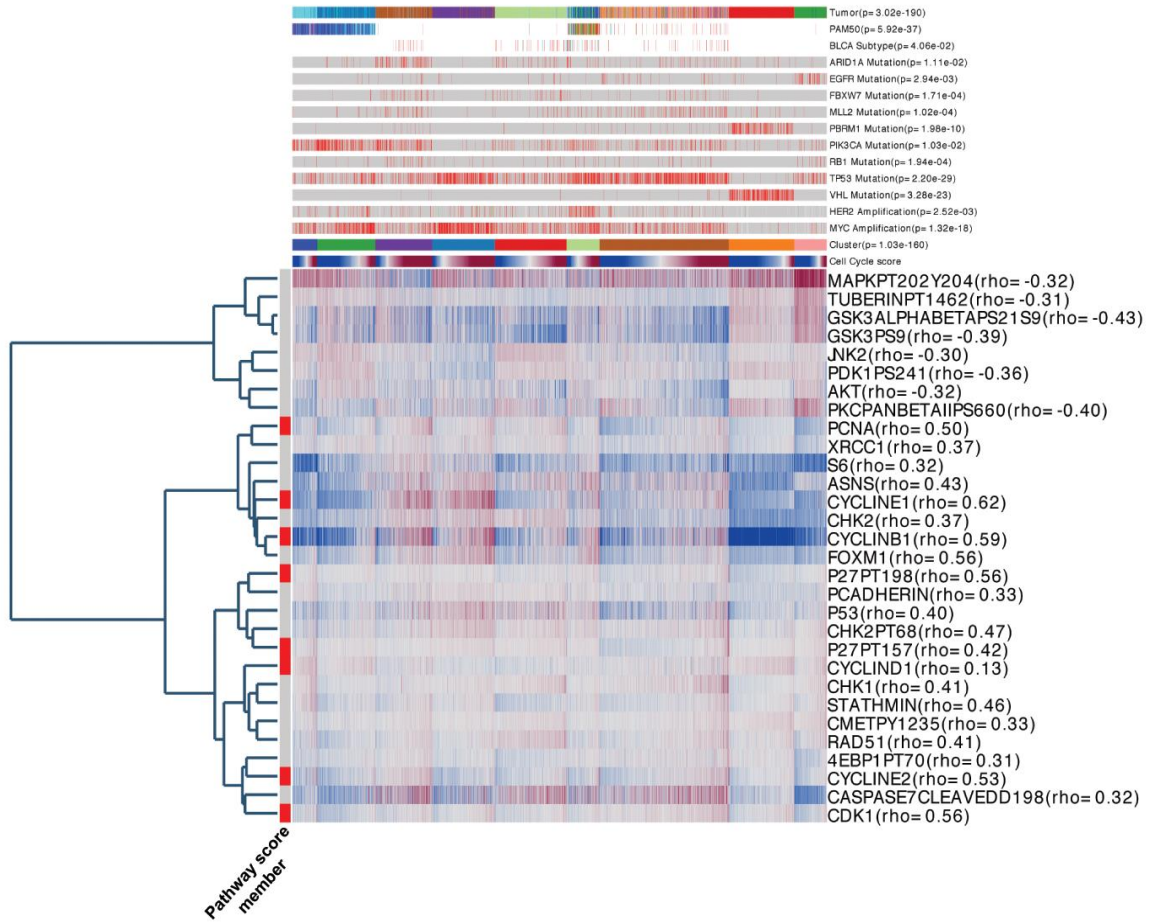

**Tumor lineage**

- BLCA
- BRCA-Basal
- BRCA-HER2
- BRCA-LuminalA/B
- BRCA-Reactive
- Colorectal
- GBM
- HNSC
- KIRC
- LUAD
- LUSC
- OVCA
- UCEC

**Cluster**

- A1
- A2
- B
- C
- D
- E
- F
- G
- H

**Mutation**

- Mutated
- Wild-type

**PAM50**

- Basal
- HER2
- Luminal A
- Luminal B
- Normal-like
- Missing data

**BLCA subtype**

- Non-papillary
- Papillary
- Missing data

**HER2 amplification**

- Amplified
- Deleted
- Wild-type
- Missing data

**MYC amplification**

- Amplified
- Non-amplified
- Missing data

**Protein expression**

Low High

**Pathway score member**

- Member
- Non-member



# DNA damage response score

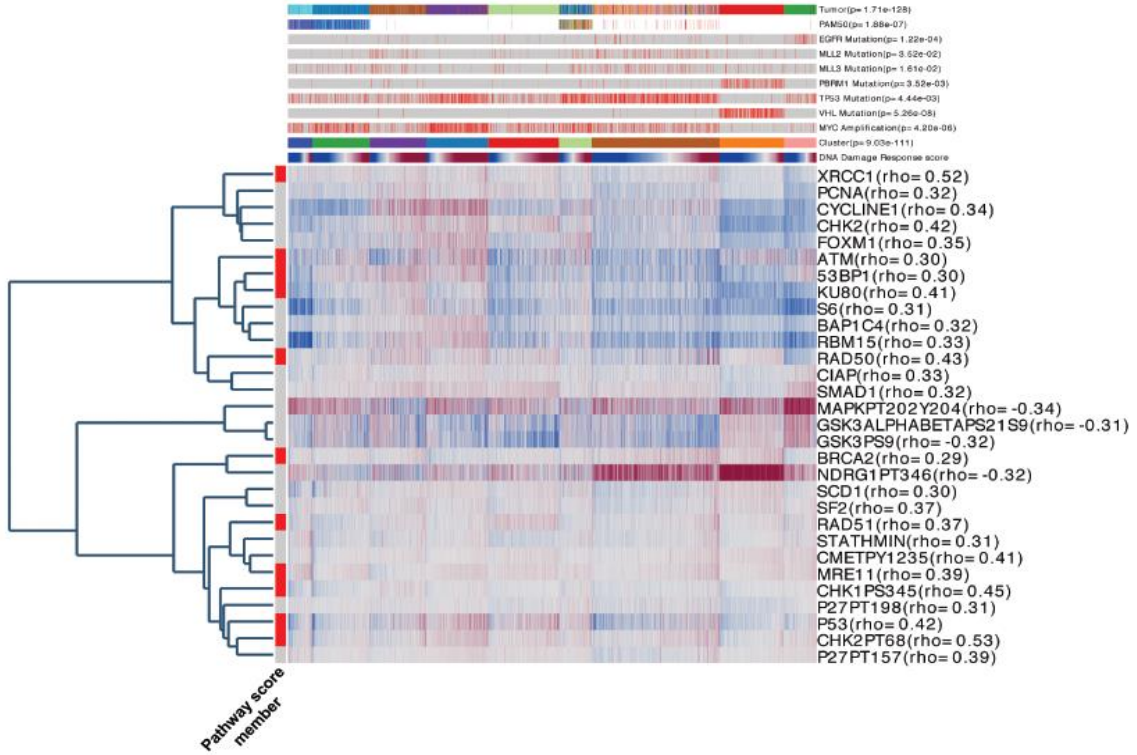

**Tumor lineage**

- BLCA
- BRCA-Basal
- BRCA-HER2
- BRCA-LuminalA/B
- BRCA-Reactive
- Colorectal
- GBM
- HNSC
- KIRC
- LUAD
- LUSC
- OVCA
- UCEC

**Cluster**

- A1
- A2
- B
- C
- D
- E
- F
- G
- H

**Mutation**

- Mutated
- Wild-type

**PAM50**

- Basal
- HER2
- Luminal A
- Luminal B
- Normal-like
- Missing data

**BLCA subtype**

- Non-papillary
- Papillary
- Missing data

**HER2 amplification**

- Amplified
- Deleted
- Wild-type
- Missing data

**MYC amplification**

- Amplified
- Non-amplified
- Missing data

**Protein expression**

Low High

**Pathway score member**

- Member
- Non-member



# EMT score

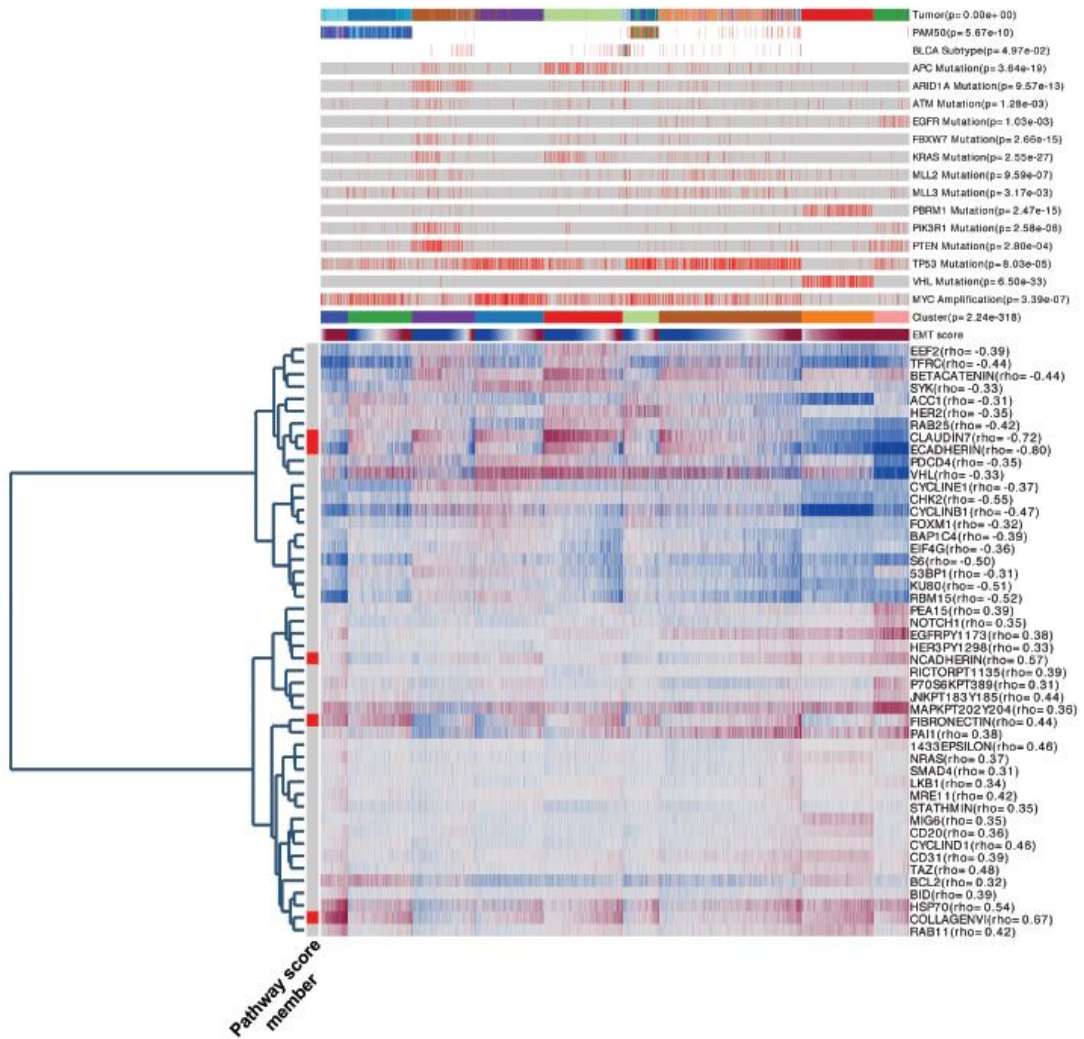

# Hormone\_a score

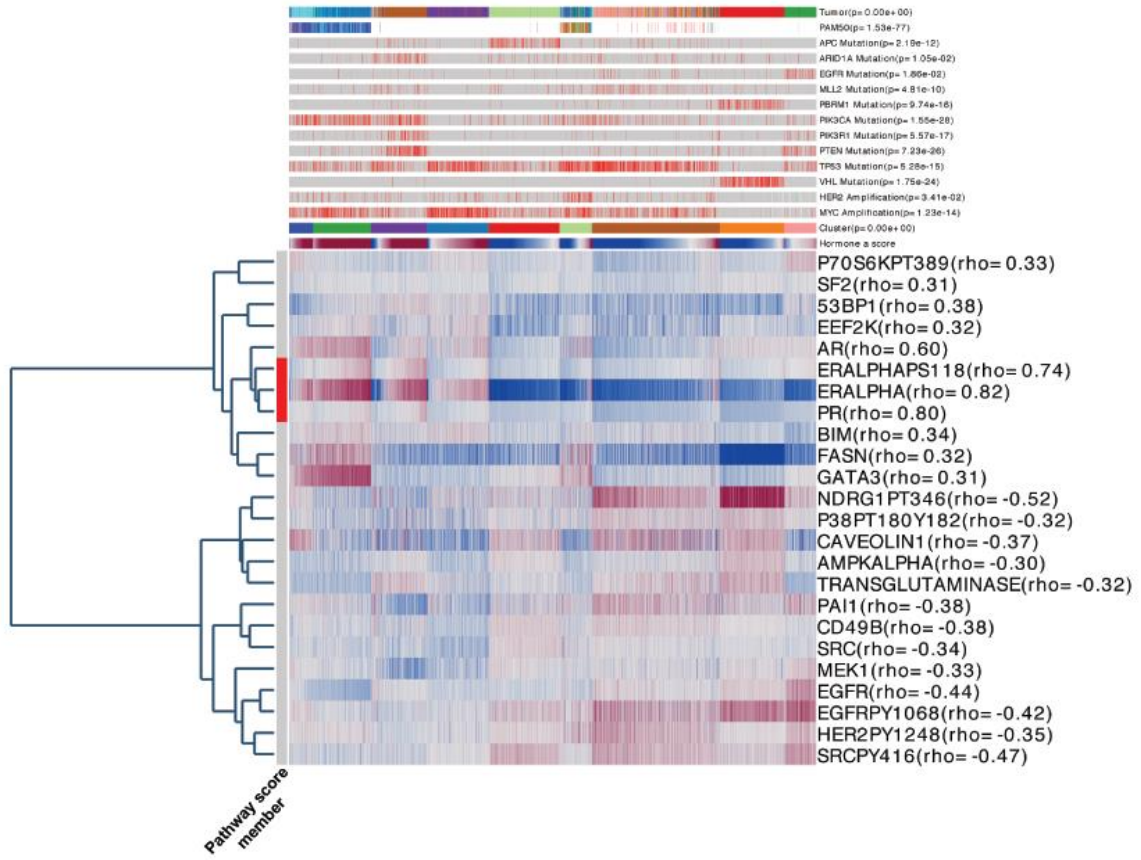

# Hormone\_b score

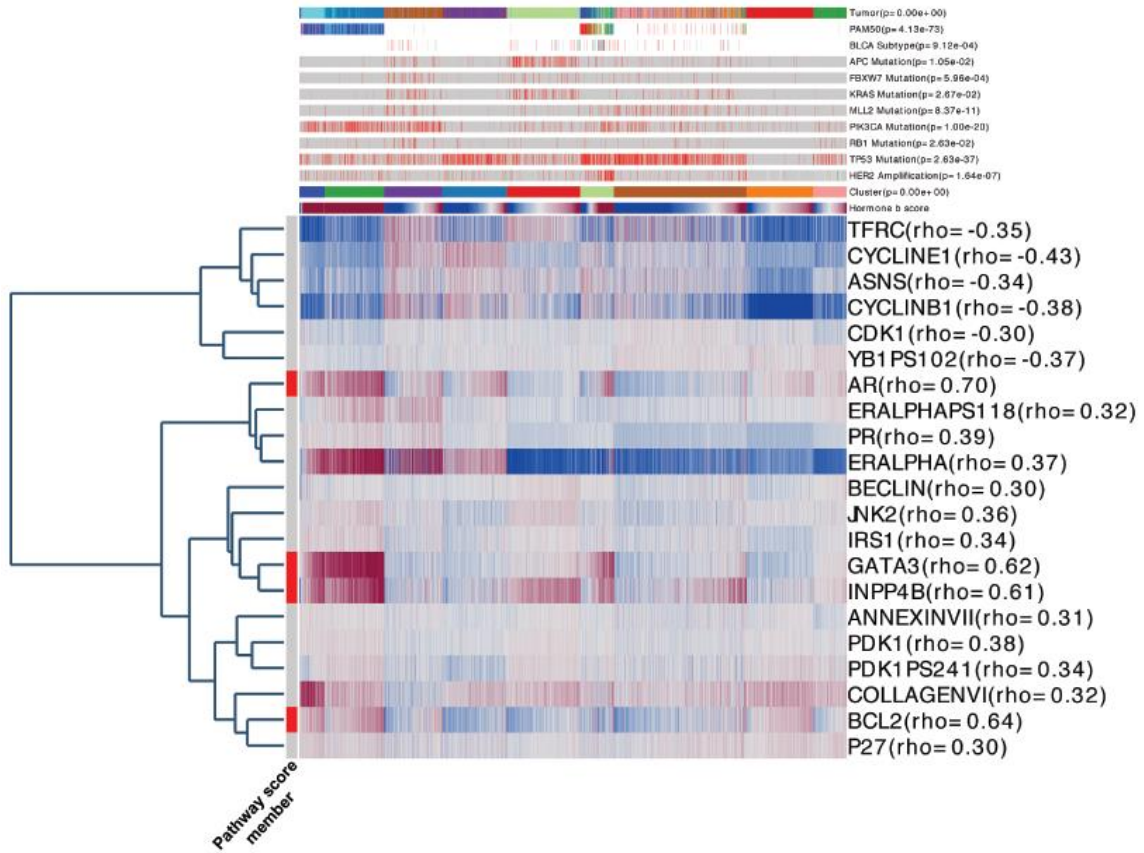

**Tumor lineage**

- BLCA
- BRCA-Basal
- BRCA-HER2
- BRCA-LuminalA/B
- BRCA-Reactive
- Colorectal
- GBM
- HNSC
- KIRC
- LUAD
- LUSC
- OVCA
- UCEC

**Cluster**

- A1
- A2
- B
- C
- D
- E
- F
- G
- H

**Mutation**

- Mutated
- Wild-type

**PAM50**

- Basal
- HER2
- Luminal A
- Luminal B
- Normal-like
- Missing data

**BLCA subtype**

- Non-papillary
- Papillary
- Missing data

**HER2 amplification**

- Amplified
- Deleted
- Wild-type
- Missing data

**MYC amplification**

- Amplified
- Non-amplified
- Missing data

**Protein expression**

Low High

**Pathway score member**

- Member
- Non-member

# PI3K/Akt score

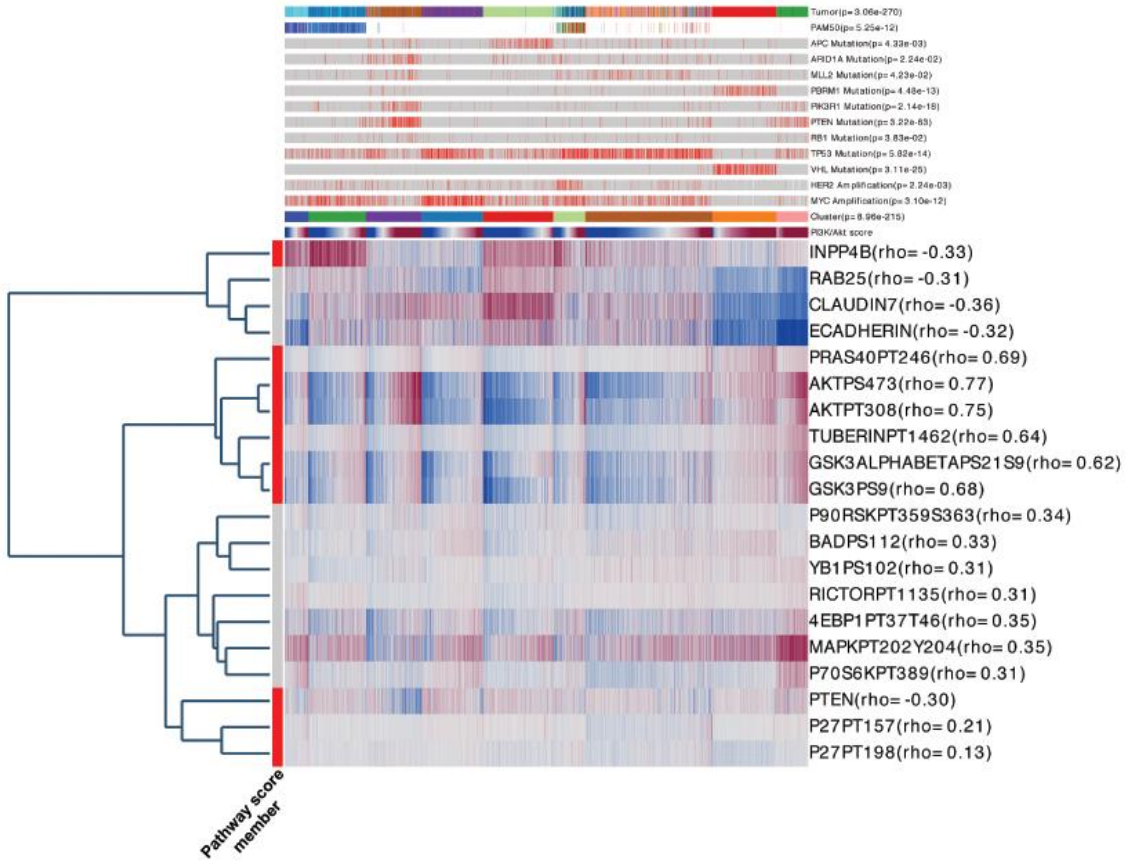

- Tumor lineage**
- BLCA
  - BRCA-Basal
  - BRCA-HER2
  - BRCA-LuminalA/B
  - BRCA-Reactive
  - Colorectal
  - GBM
  - HNSC
  - KIRC
  - LUAD
  - LUSC
  - OVCA
  - UCEC

- Cluster**
- A1
  - A2
  - B
  - C
  - D
  - E
  - F
  - G
  - H
- Mutation**
- Mutated
  - Wild-type

- PAM50**
- Basal
  - HER2
  - Luminal A
  - Luminal B
  - Normal-like
  - Missing data
- BLCA subtype**
- Non-papillary
  - Papillary
  - Missing data

- HER2 amplification**
- Amplified
  - Deleted
  - Wild-type
  - Missing data
- MYC amplification**
- Amplified
  - Non-amplified
  - Missing data

- Protein expression**
- Low High

- Pathway score member**
- Member
  - Non-member



# Ras/MAPK score

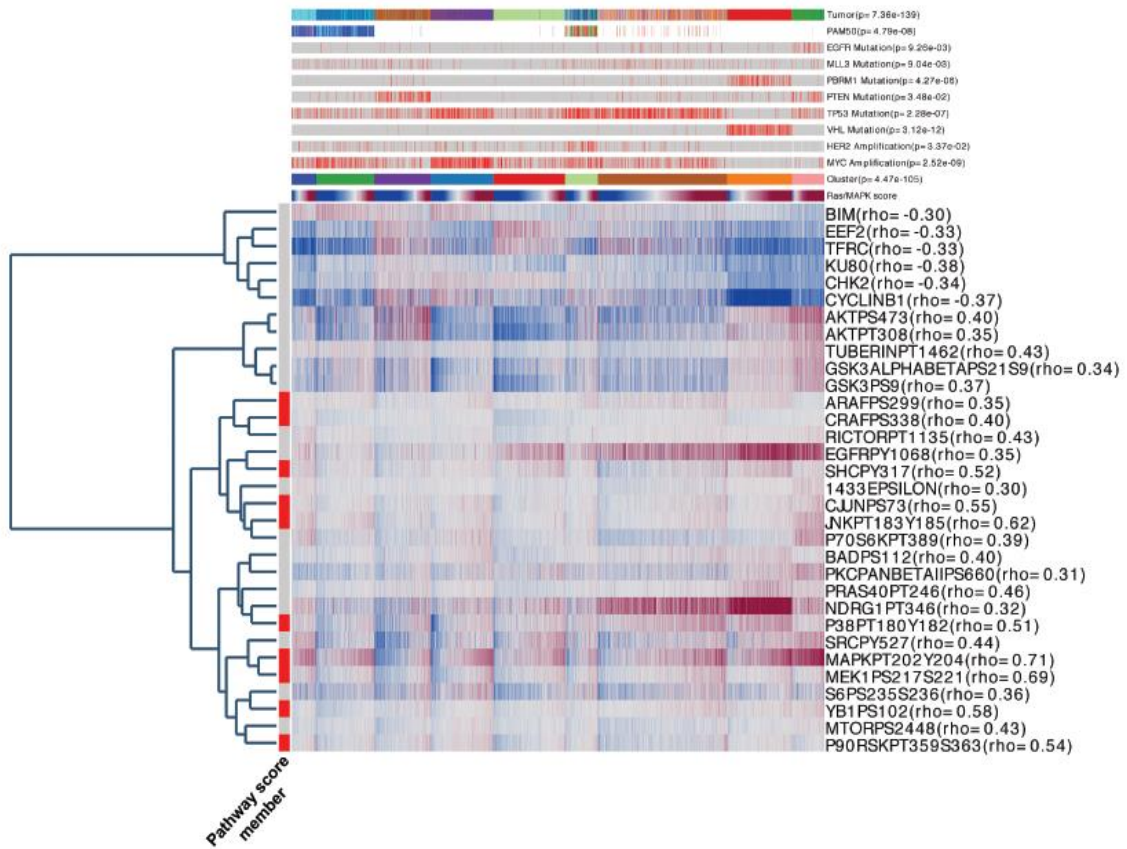

**Tumor lineage**

- BLCA
- BRCA-Basal
- BRCA-HER2
- BRCA-LuminalA/B
- BRCA-Reactive
- Colorectal
- GBM
- HNSC
- KIRC
- LUAD
- LUSC
- OVCA
- UCEC

**Cluster**

- A1
- A2
- B
- C
- D
- E
- F
- G
- H

**Mutation**

- Mutated
- Wild-type

**PAM50**

- Basal
- HER2
- Luminal A
- Luminal B
- Normal-like
- Missing data

**BLCA subtype**

- Non-papillary
- Papillary
- Missing data

**HER2 amplification**

- Amplified
- Deleted
- Wild-type
- Missing data

**MYC amplification**

- Amplified
- Non-amplified
- Missing data

**Protein expression**

Low High

**Pathway score member**

- Member
- Non-member

# RTK score

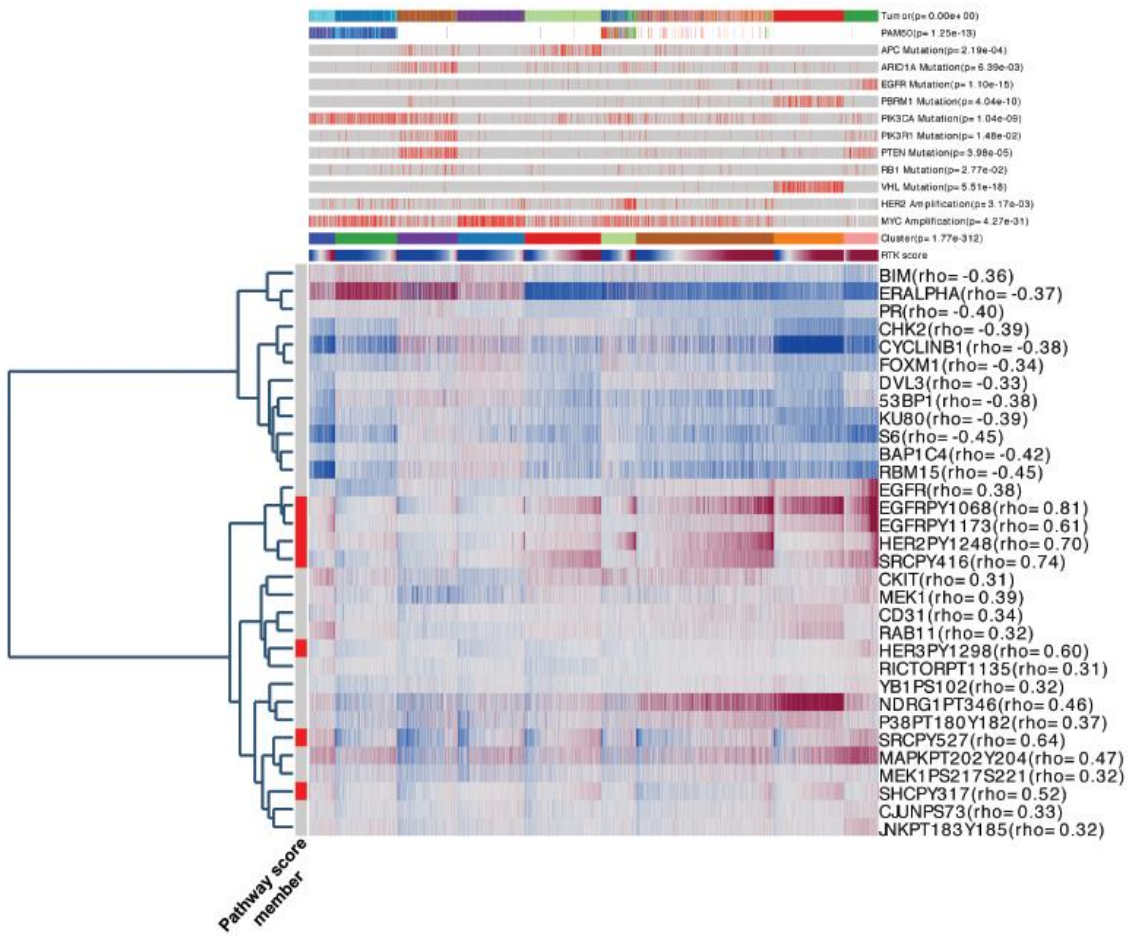

**Tumor lineage**

- BLCA
- BRCA-Basal
- BRCA-HER2
- BRCA-LuminalA/B
- BRCA-Reactive
- Colorectal
- GBM
- HNSC
- KIRC
- LUAD
- LUSC
- OVCA
- UCEC

**Cluster**

- A1
- A2
- B
- C
- D
- E
- F
- G
- H

**Mutation**

- Mutated
- Wild-type

**PAM50**

- Basal
- HER2
- Luminal A
- Luminal B
- Normal-like
- Missing data

**BLCA subtype**

- Non-papillary
- Papillary
- Missing data

**HER2 amplification**

- Amplified
- Deleted
- Wild-type
- Missing data

**MYC amplification**

- Amplified
- Non-amplified
- Missing data

**Protein expression**

Low High

**Pathway score member**

- Member
- Non-member

# TSC/mTOR score

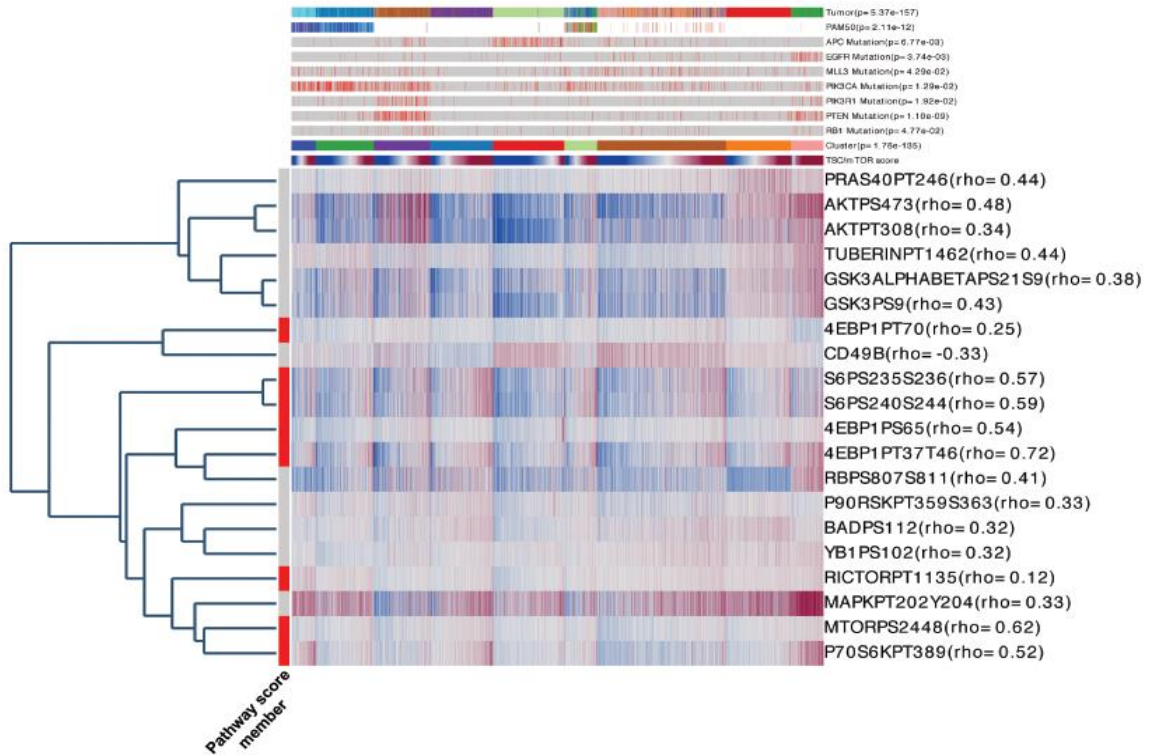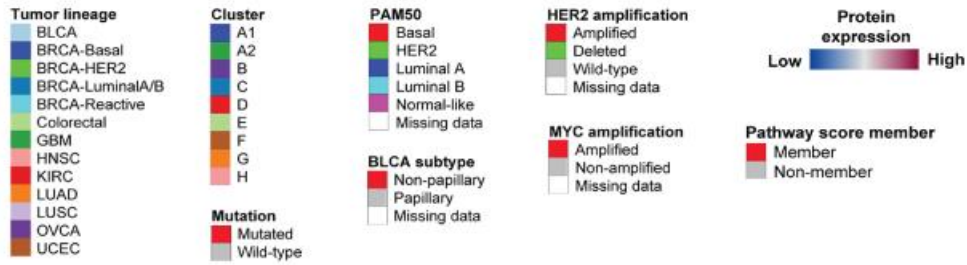



Supplementary Figure 7: Dotplots showing pathway scores across RBN clusters

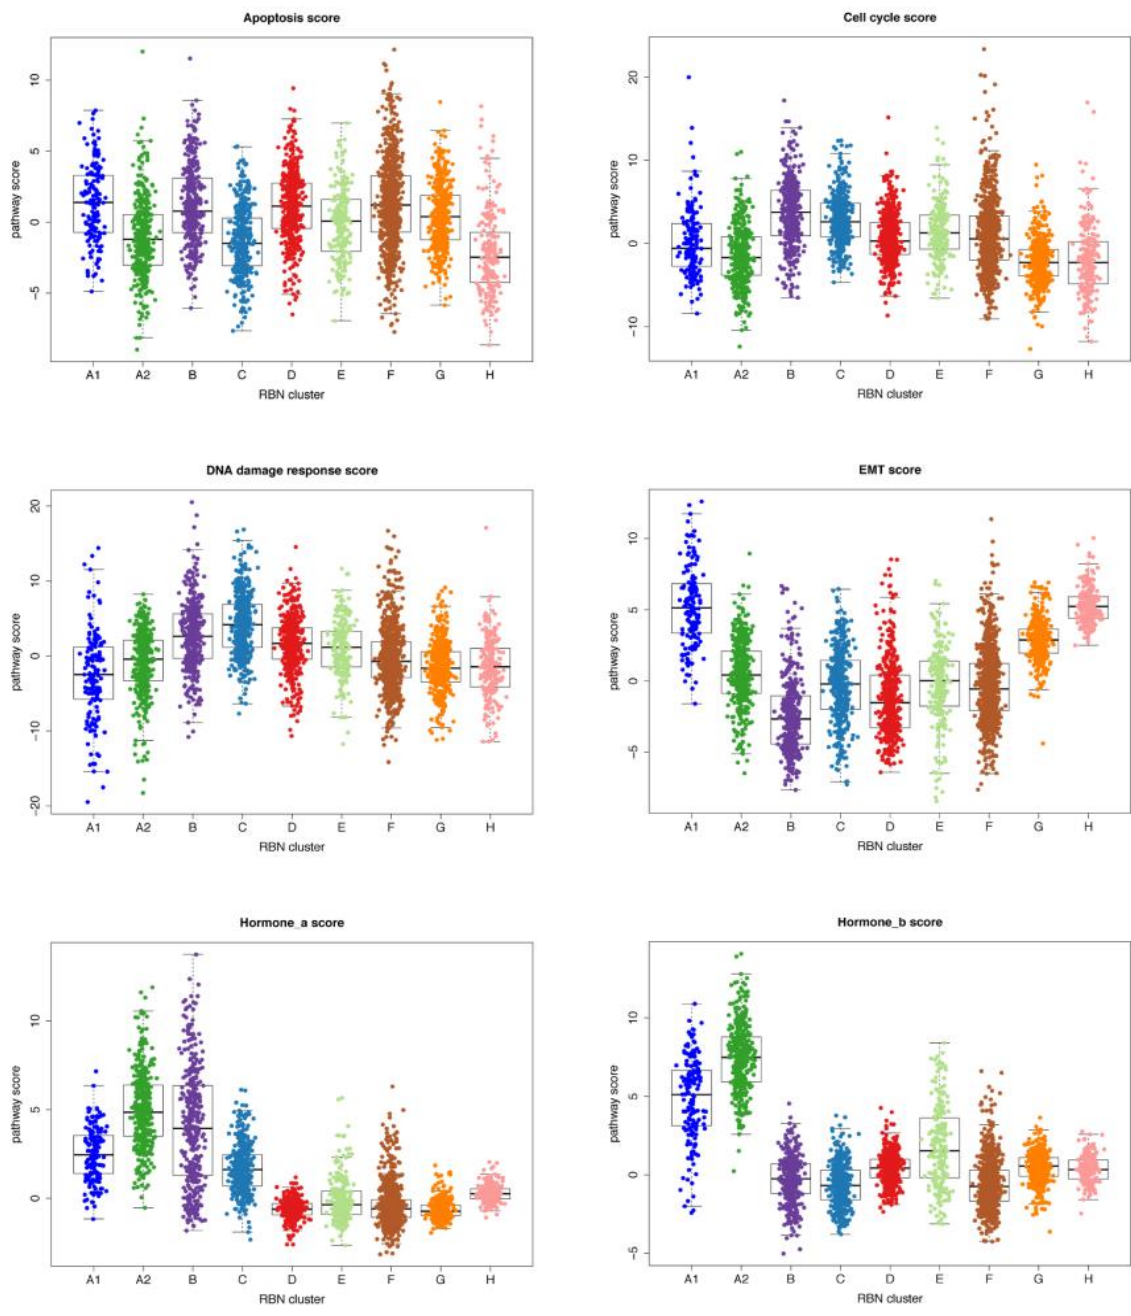

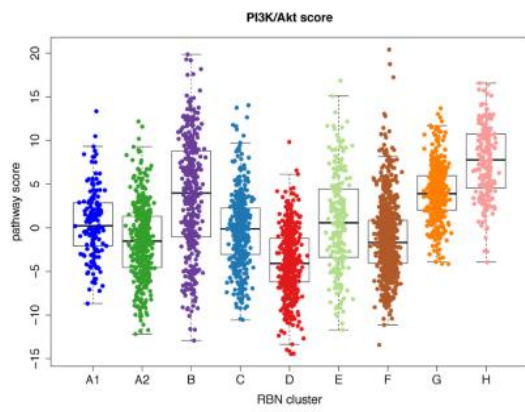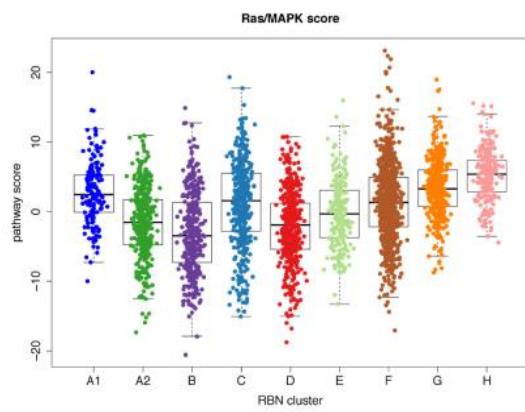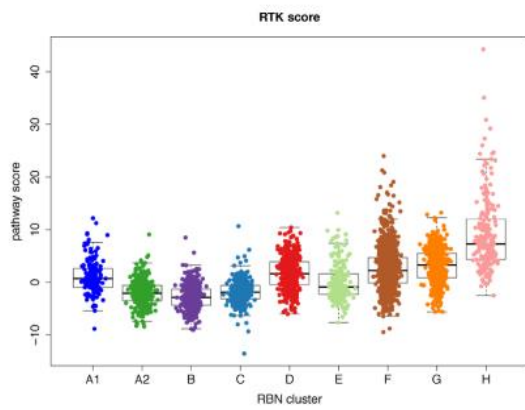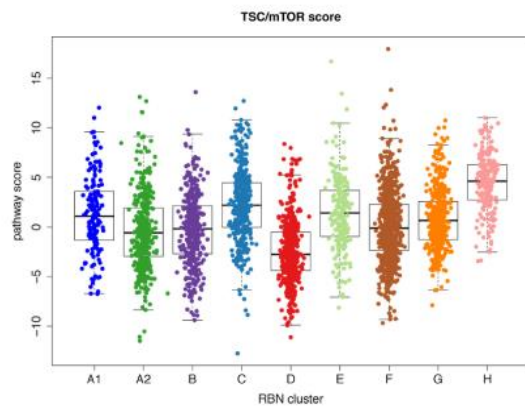

Pathway score of each sample, across RBN clusters, is shown in the dotplots. Each dot represents pathway score of a sample.

**Supplementary Figure 8: Heatmaps showing pathway members and associated proteins and molecular/ clinical variables with pathway scores (RBN dataset by tumor lineage)**

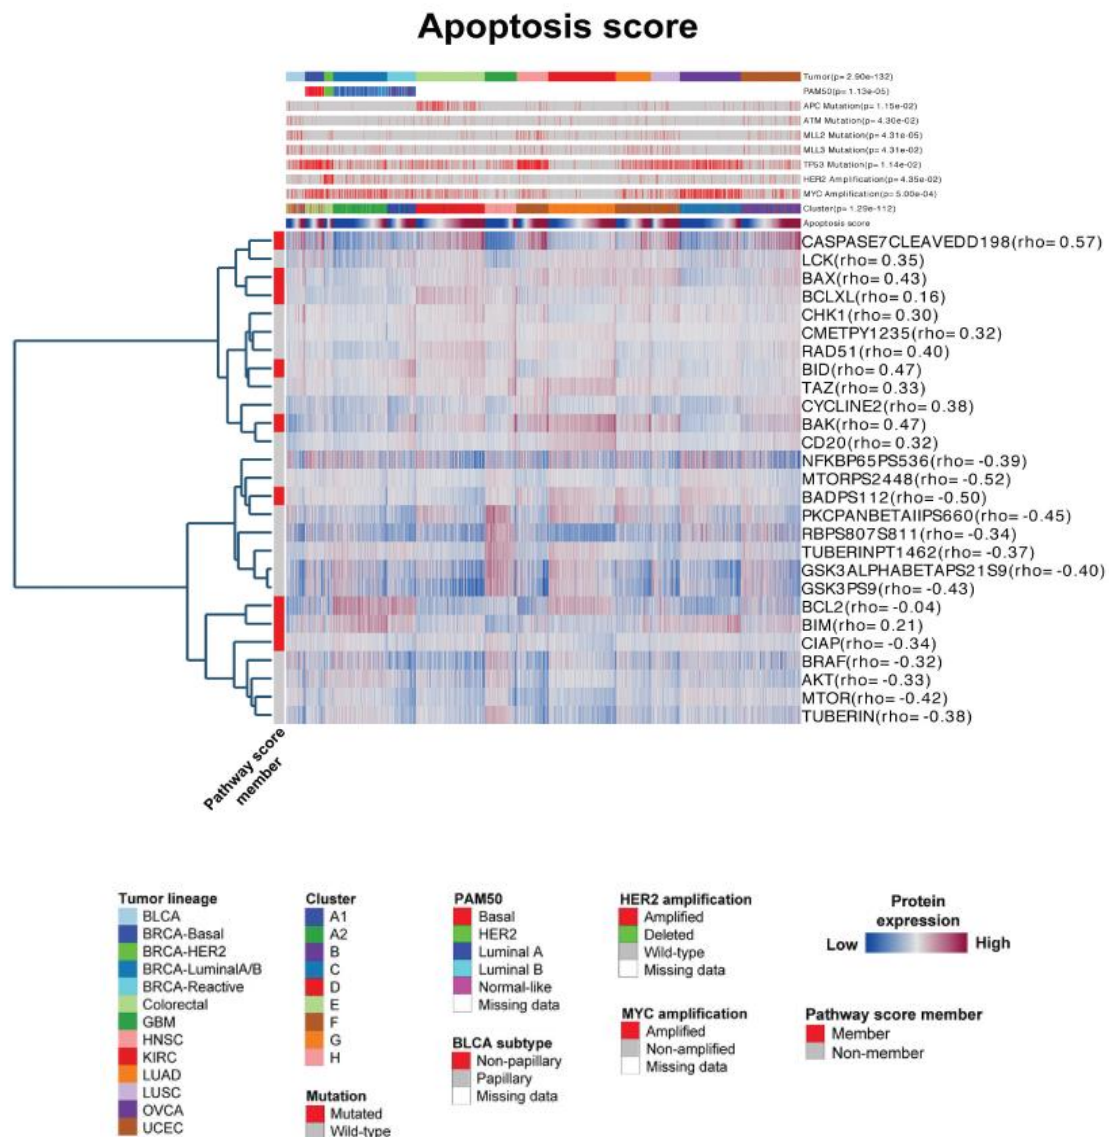

The pathways included are (in alphabetical order) Apoptosis, Cell cycle, DNA damage response, EMT, Hormone\_a, Hormone\_b, PI3K/Akt, Ras/MAPK, RTK and TSC/mTOR. Heatmaps depict the protein levels of the pathway members and proteins with a high correlation ( $\rho > 0.3$ /  $\rho < -0.3$ , Spearman's correlation) to the pathway score. Annotation bars (selected from Fig. 2) are included if statistically associated with the pathway score ( $P$ -values  $< 0.05$ , Kruskal-Wallis test). Pathway members are marked in red on the left hand side. High-resolution images of the heatmap can be found online (<http://bioinformatics.mdanderson.org/main/TCGA/Pancan11/RPPA>).

# Cell cycle score

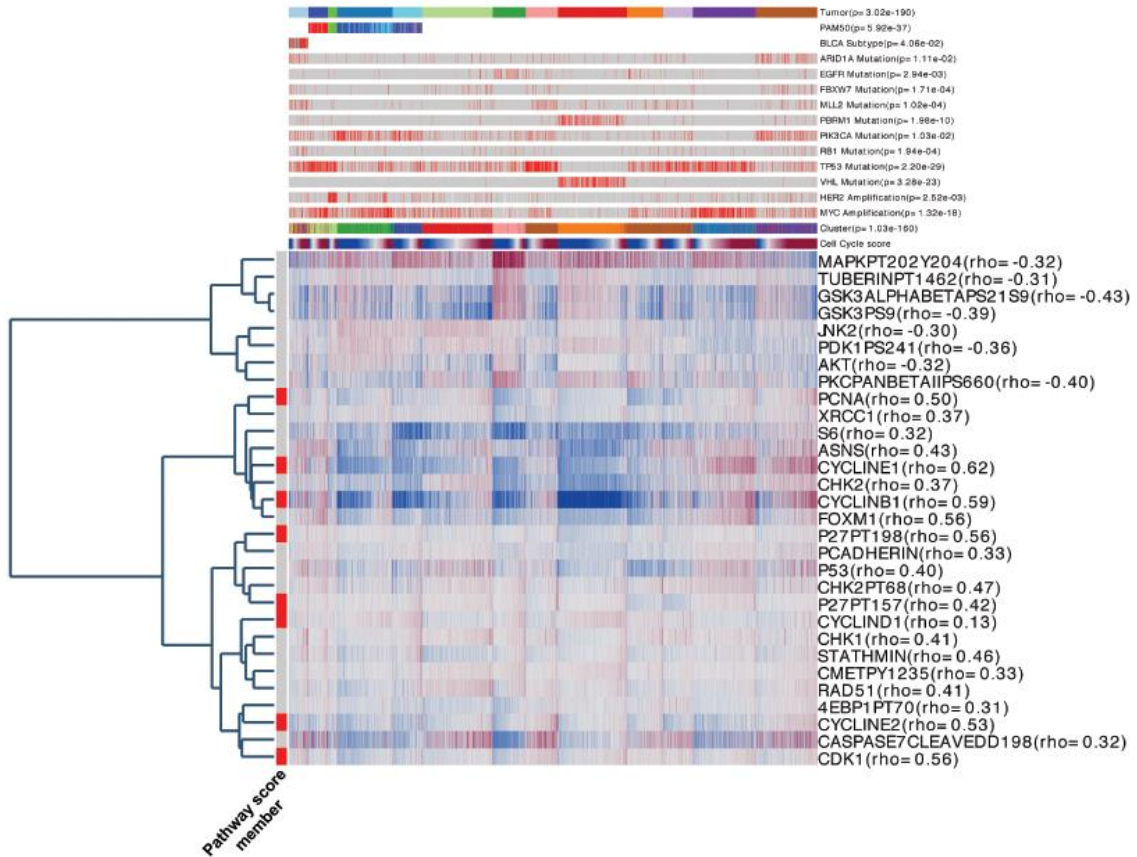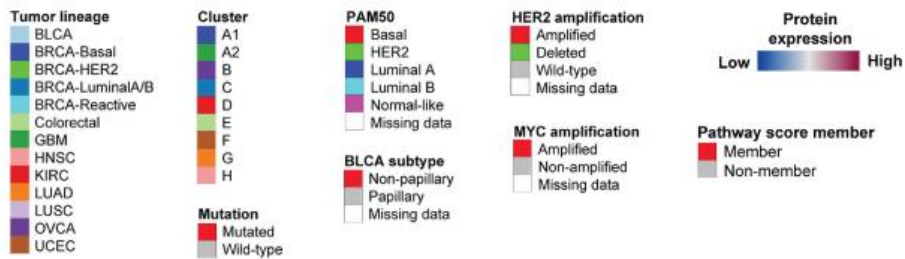



## DNA damage repair score

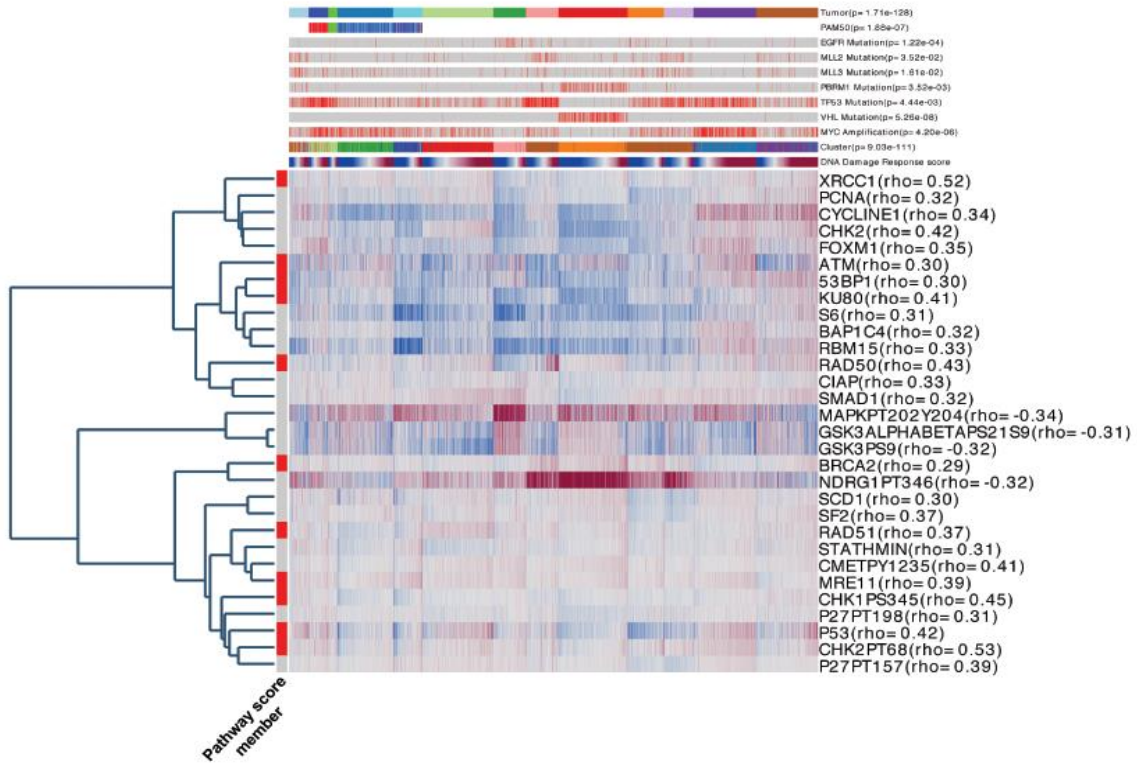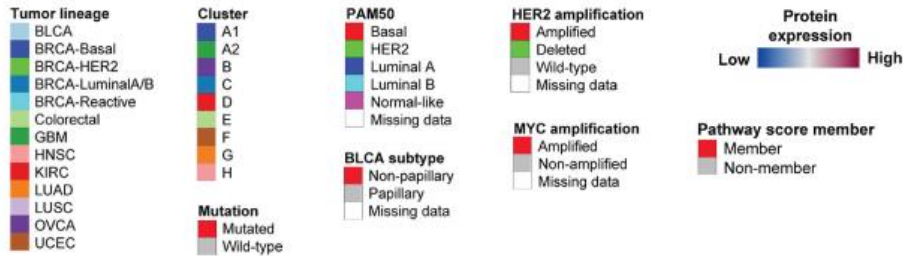

# EMT score

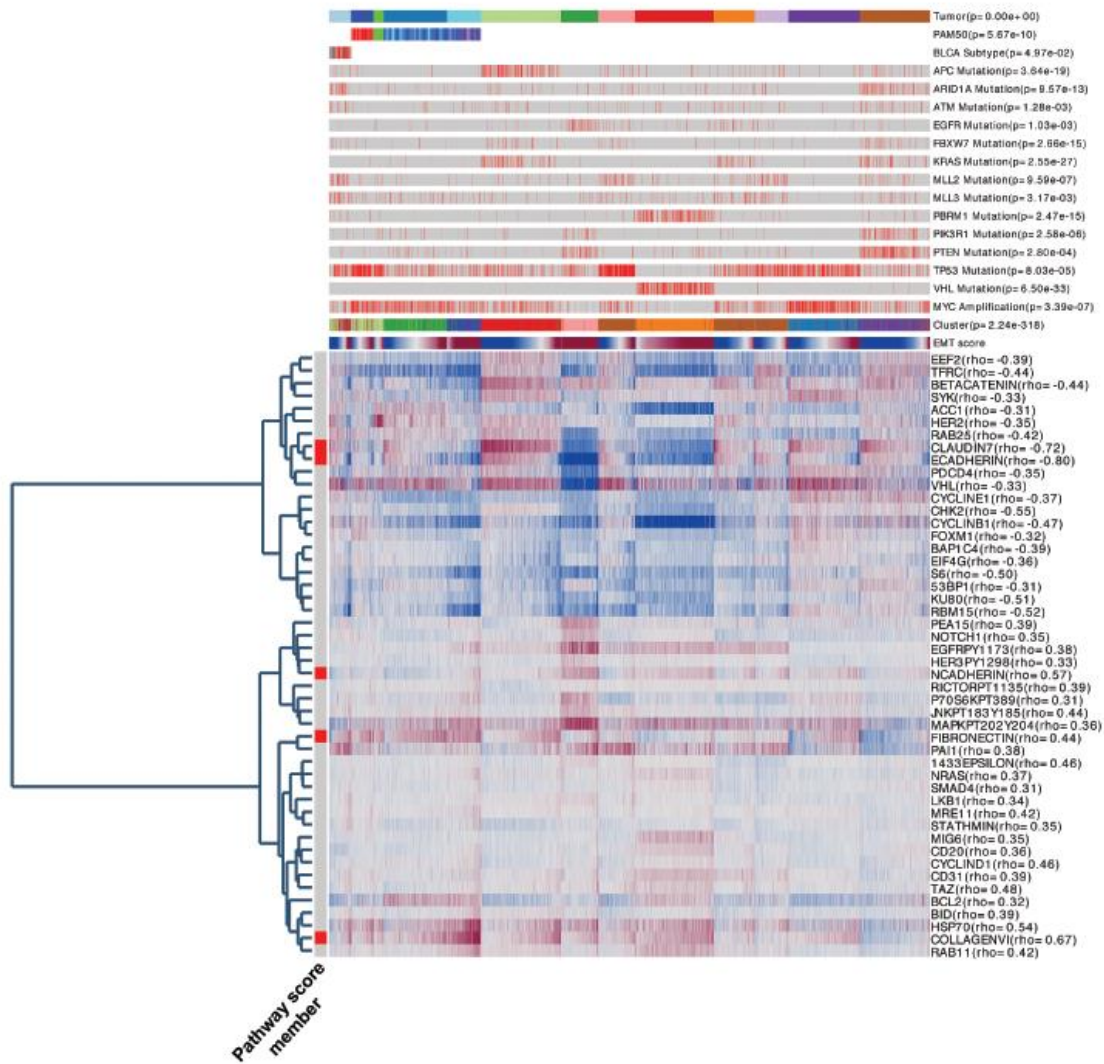

- Tumor lineage**
- BLCA
  - BRCA-Basal
  - BRCA-HER2
  - BRCA-LuminalA/B
  - BRCA-Reactive
  - Colorectal
  - GBM
  - HNSC
  - KIRC
  - LUAD
  - LUSC
  - OVCA
  - UCEC

- Cluster**
- A1
  - A2
  - B
  - C
  - D
  - E
  - F
  - G
  - H
- Mutation**
- Mutated
  - Wild-type

- PAM50**
- Basal
  - HER2
  - Luminal A
  - Luminal B
  - Normal-like
  - Missing data
- BLCA subtype**
- Non-papillary
  - Papillary
  - Missing data

- HER2 amplification**
- Amplified
  - Deleted
  - Wild-type
  - Missing data
- MYC amplification**
- Amplified
  - Non-amplified
  - Missing data

- Protein expression**
- Low High

- Pathway score member**
- Member
  - Non-member

# Hormone\_a score

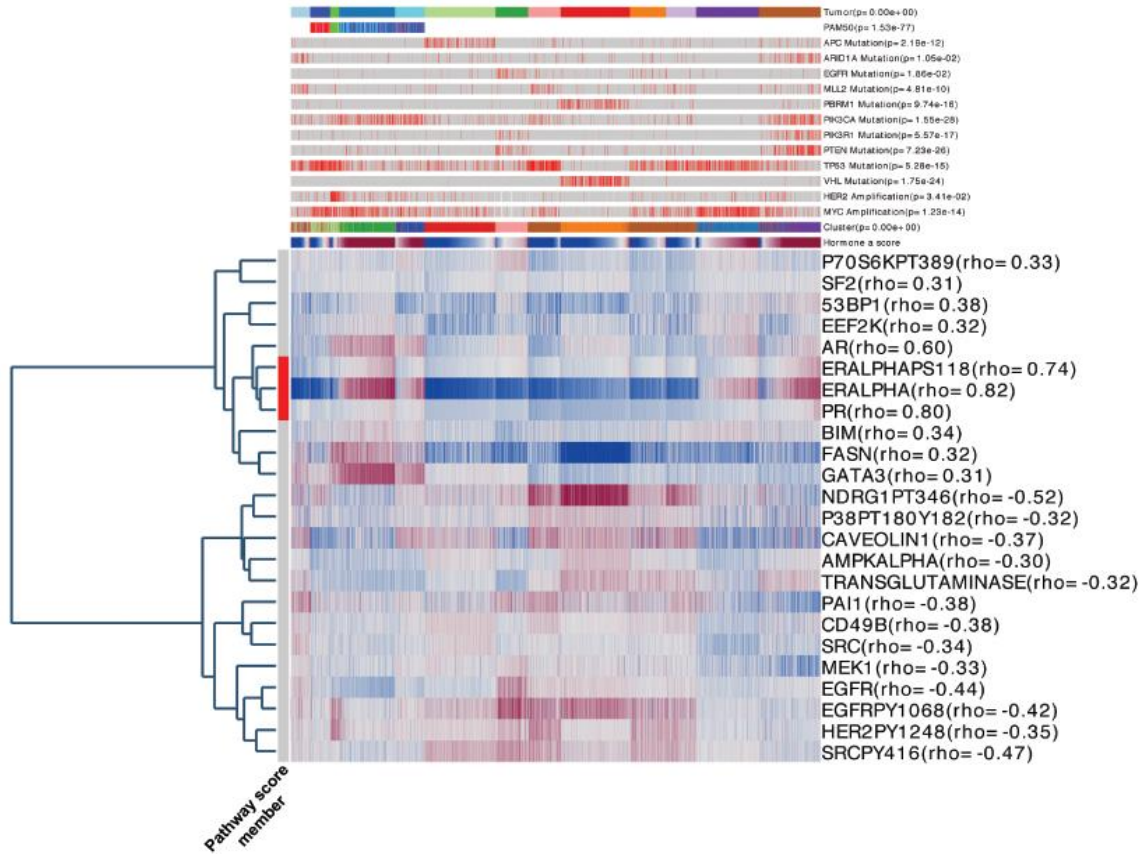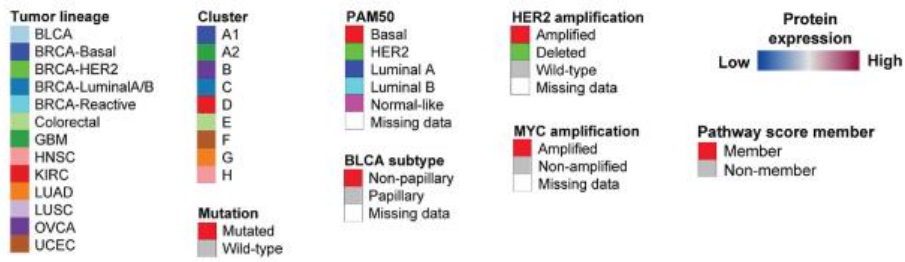



# Hormone\_b score

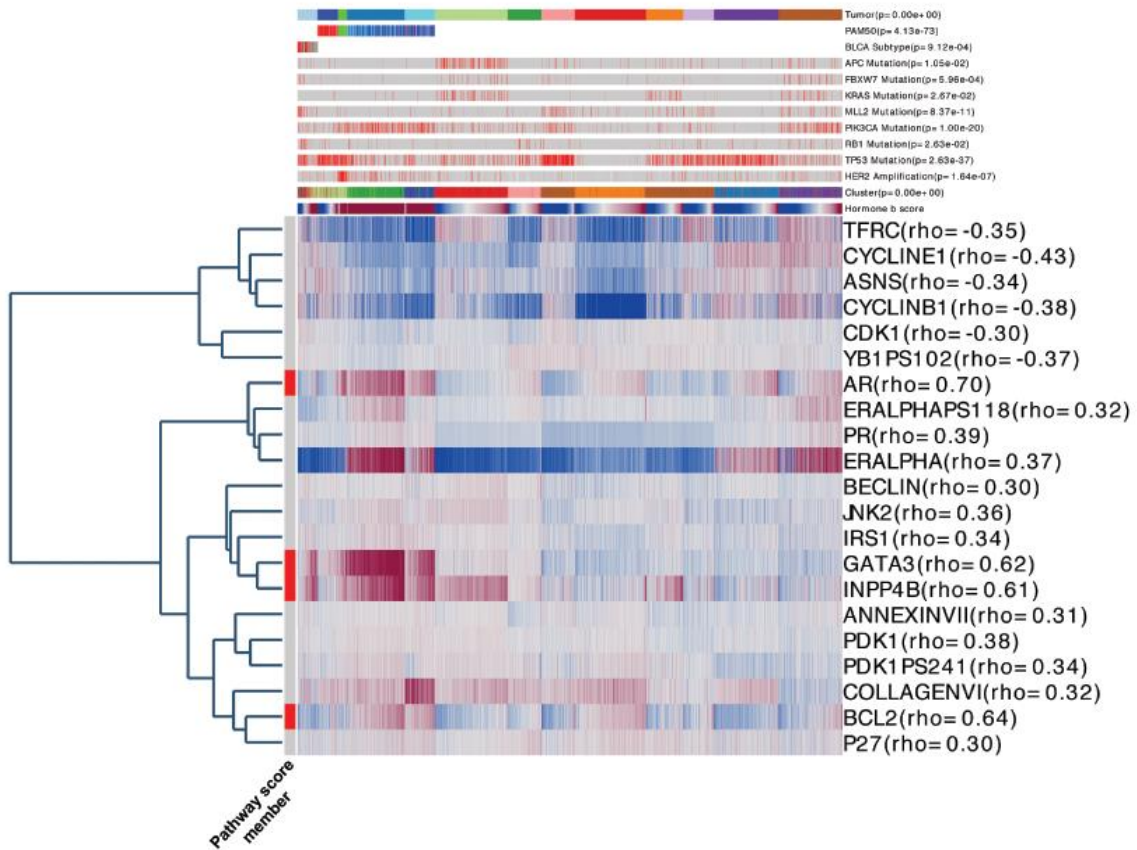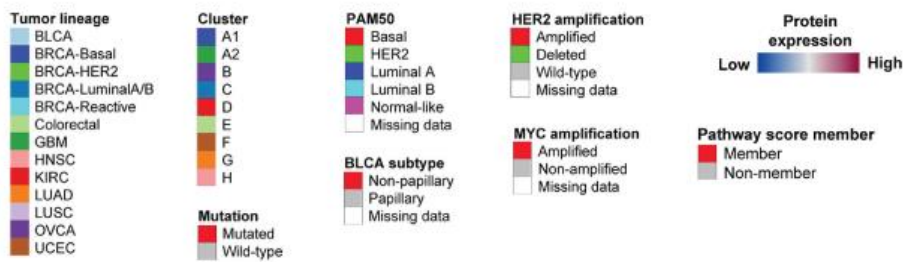

# PI3K/Akt score

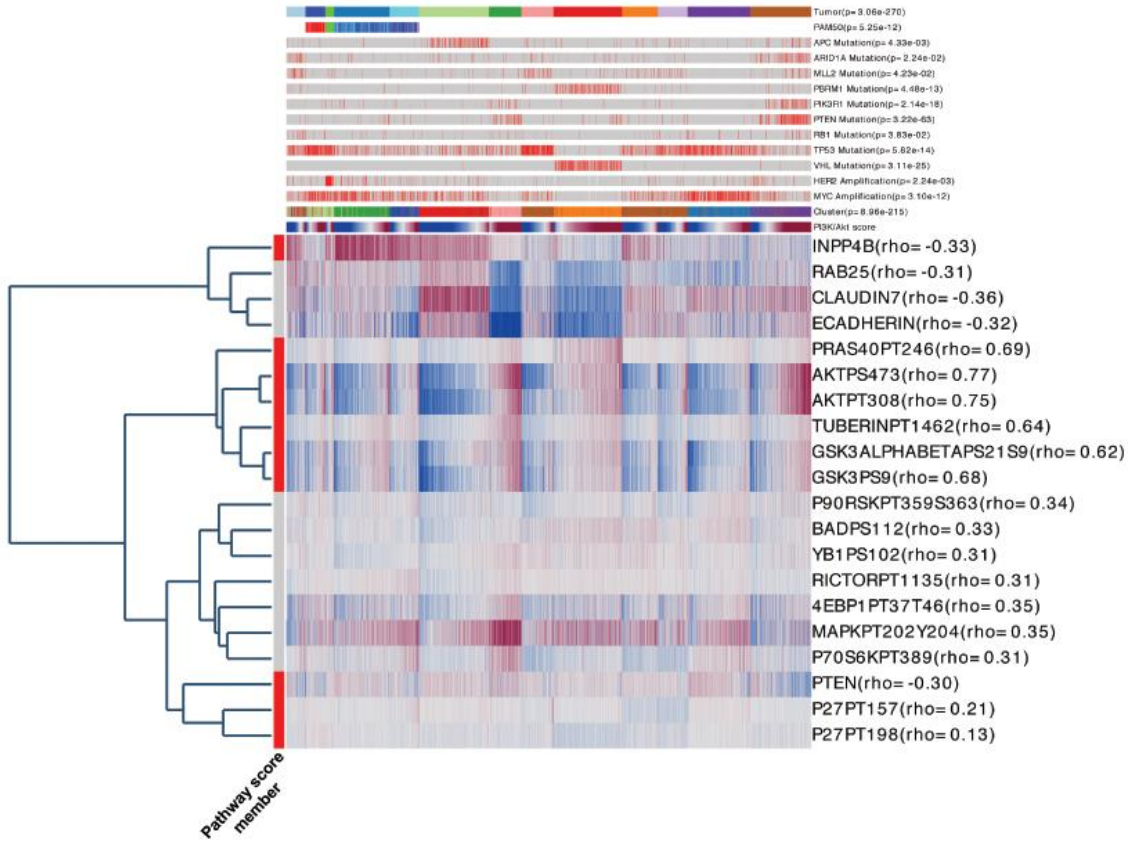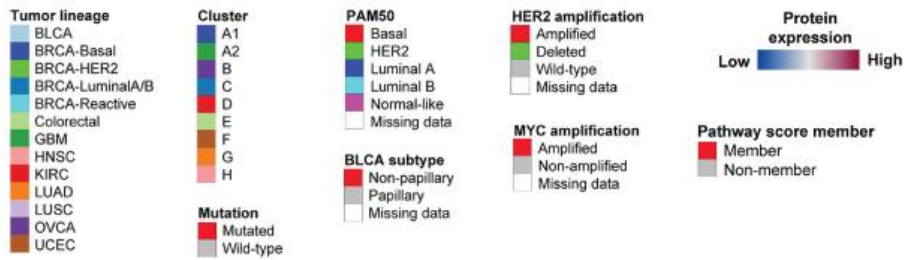

# Ras/MAPK score

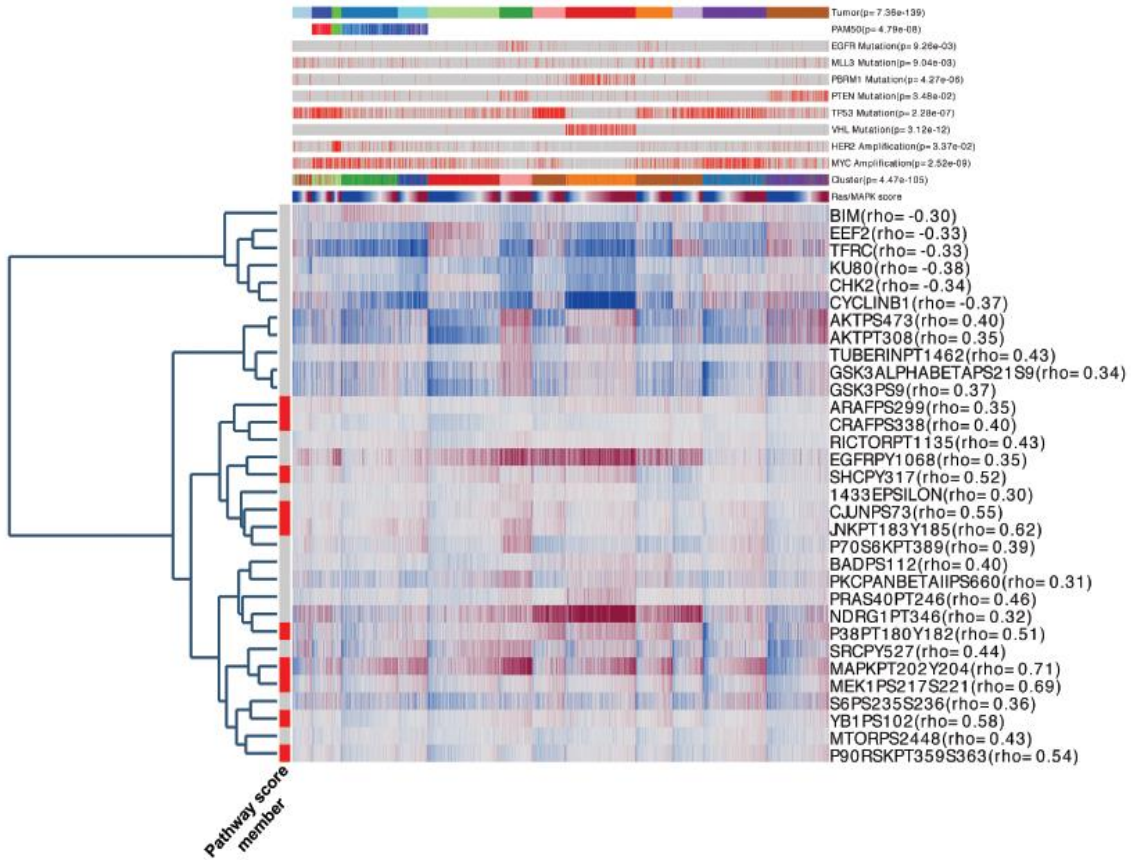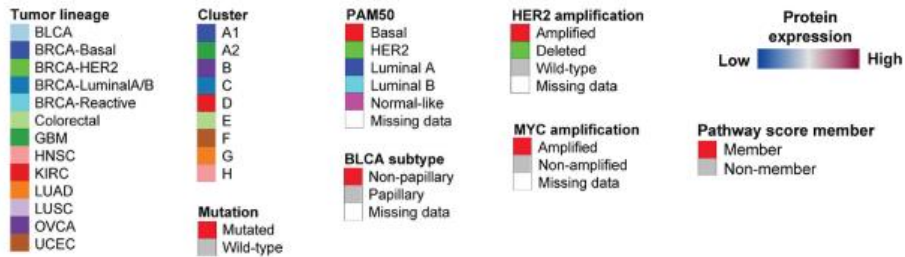

# RTK score

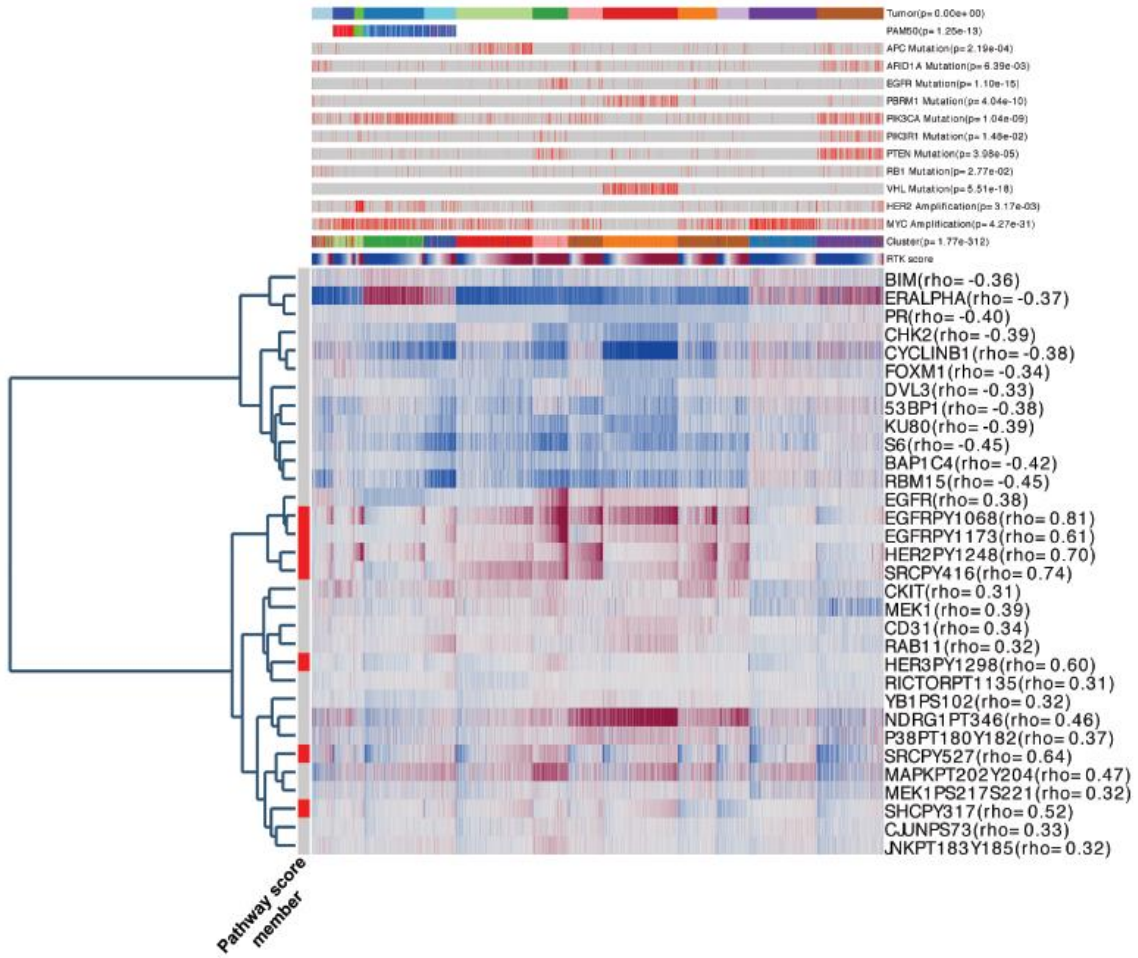



# TSC/mTOR score

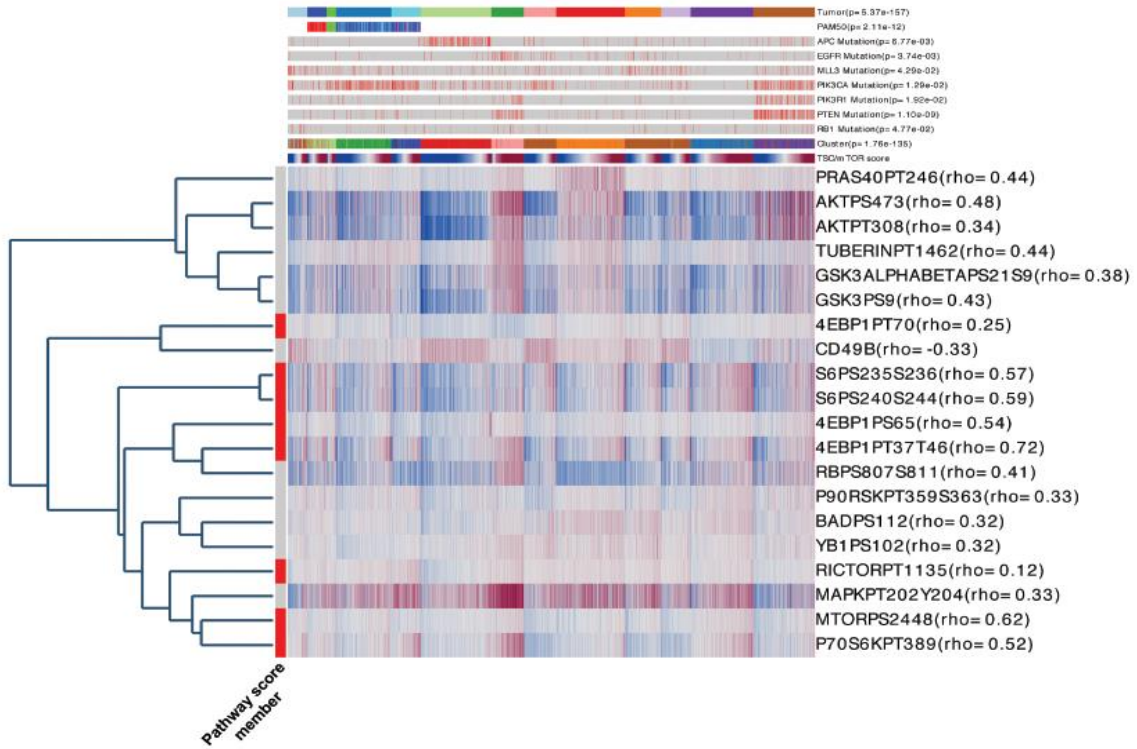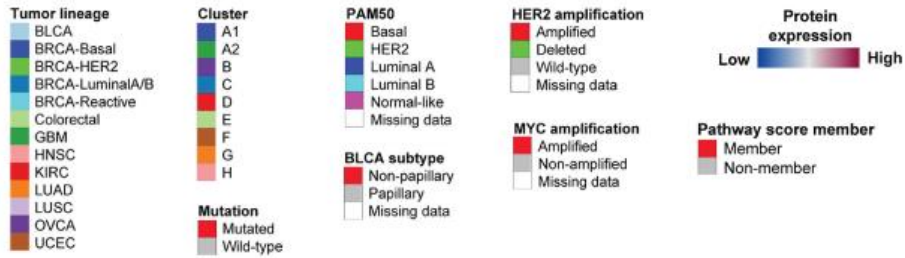

# Supplementary Figure 9: Dotplots showing pathway scores (RBN dataset) across tumor lineages

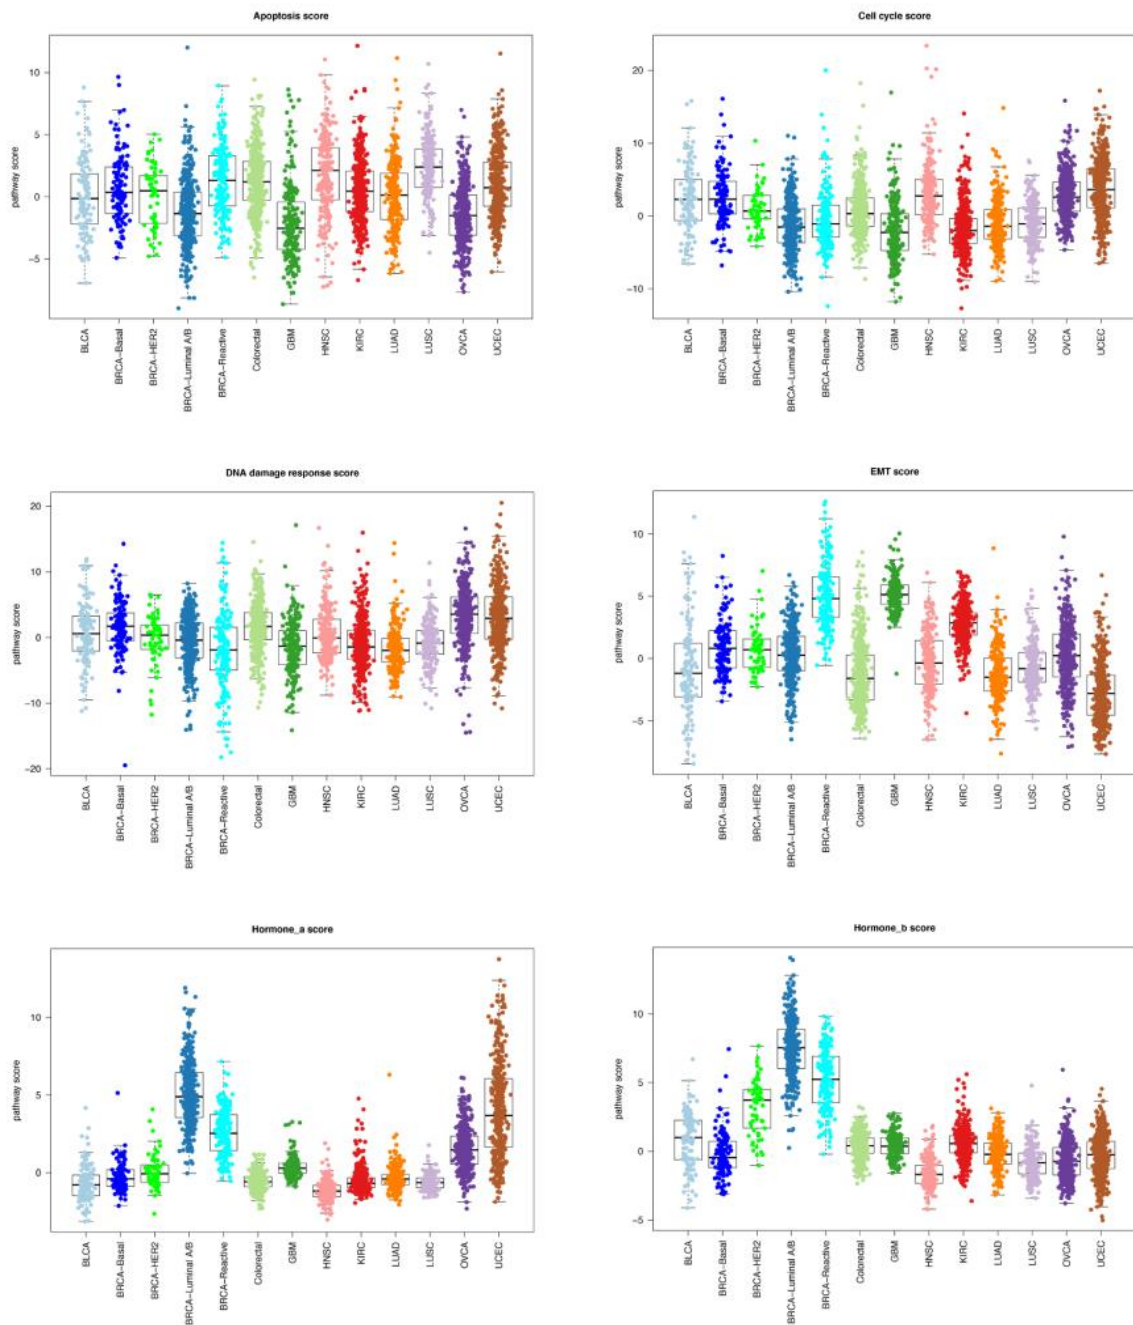

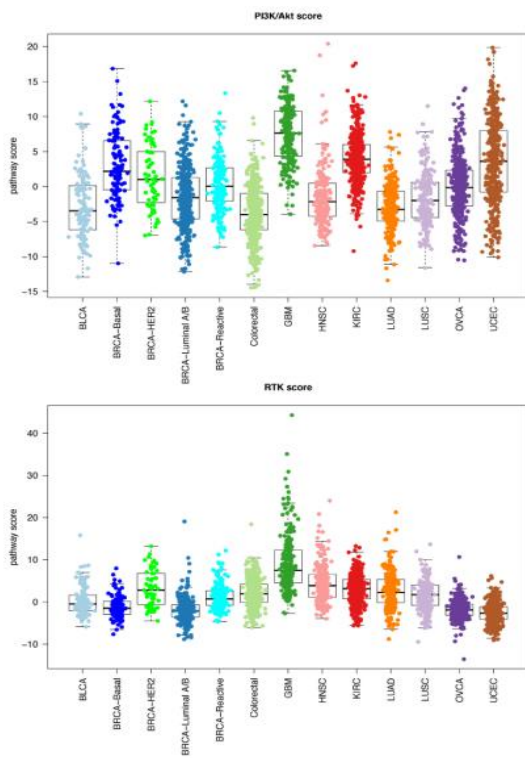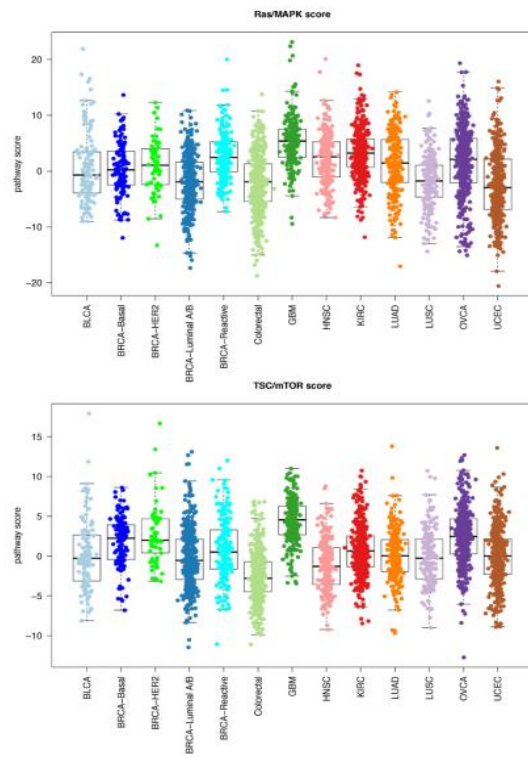

Pathway score of each sample, across RBN clusters, is shown in the dotplots. Each dot represents pathway score of a sample.



**Supplementary Figure 10: Heatmaps depicting differential pathway activity (sign independent absolute values) for tumor lineages and protein clusters based on the (a) RBN and (b) MC datasets**

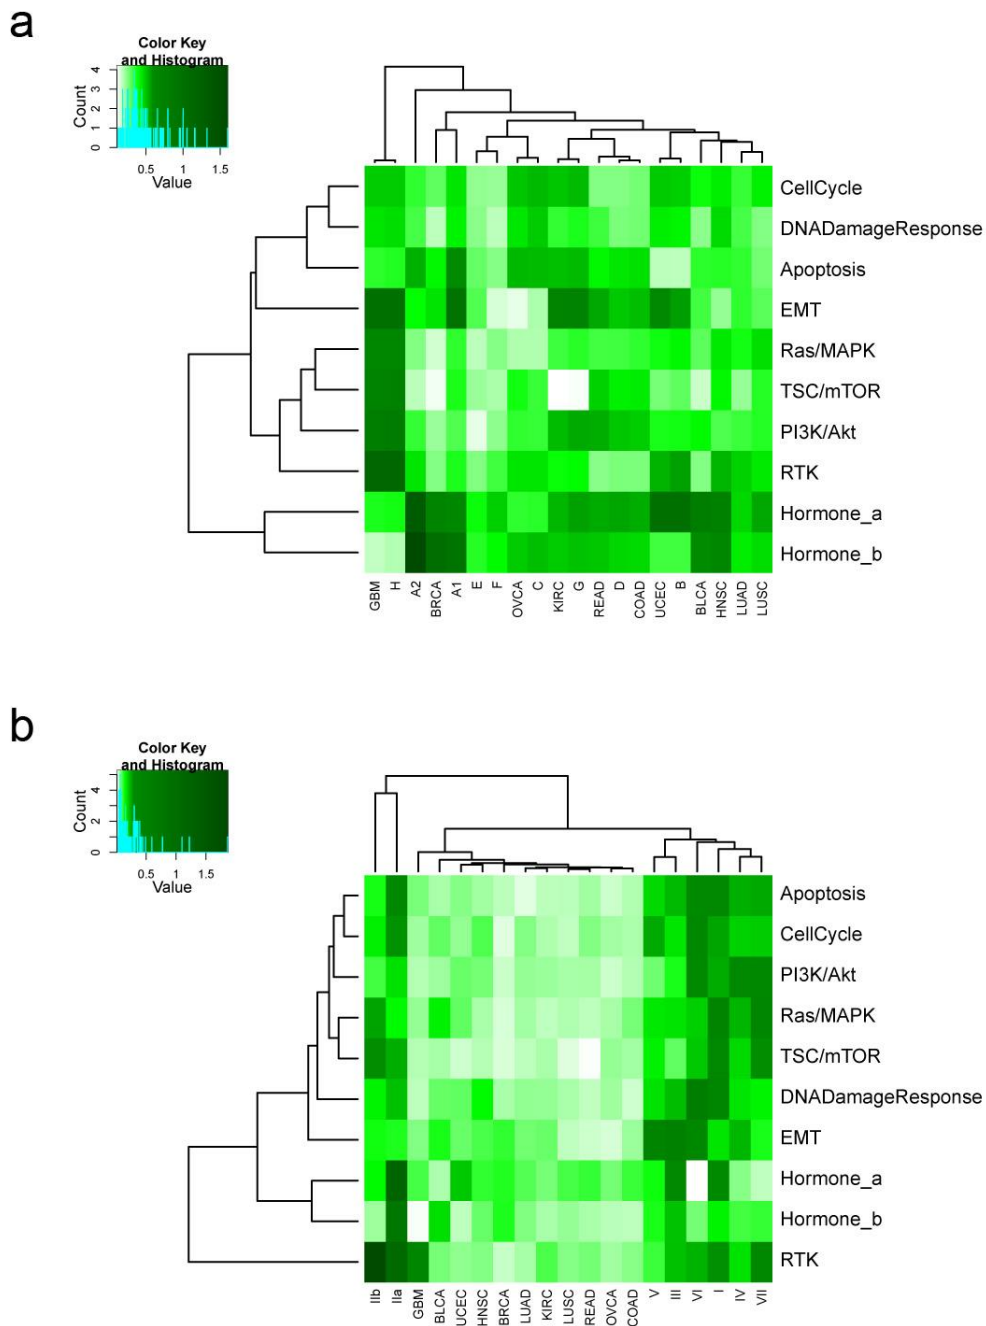

The heatmaps show unsupervised hierarchical clustering on both axes. After scaling the data to mean zero globally, for each pathway and cluster or disease type, the average absolute protein level over the pathway proteins was calculated. This differential pathway activity indicates the deviation in a given cluster or disease type of this pathway from its mean expression, irrespective of activation or suppression, and can thus be seen as a proxy for pathway differentiation. White color means no change, whereas dark green color means a large change from the mean.

Supplementary Figure 11: Zoomed-in views of RBN heatmap showing hormone\_a and hormone\_b in clusters\_A1, \_A2 and \_E

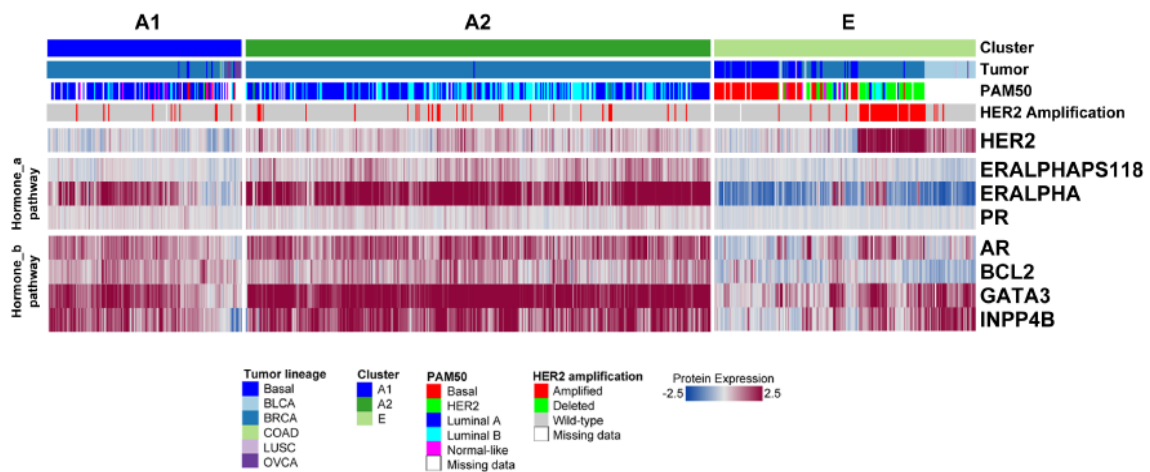

Heatmap shows the protein level of members in hormone\_a and hormone\_b in cluster\_A1, \_A2 and \_E, underscoring that HER2-positive breast cancers, whether ER-positive or -negative, demonstrated elevated levels of GATA3, INPP4B, and AR suggestive of active downstream hormonal signaling despite low levels of ER, pER and PR.

Supplementary Figure 12: Pathways related to patient outcome

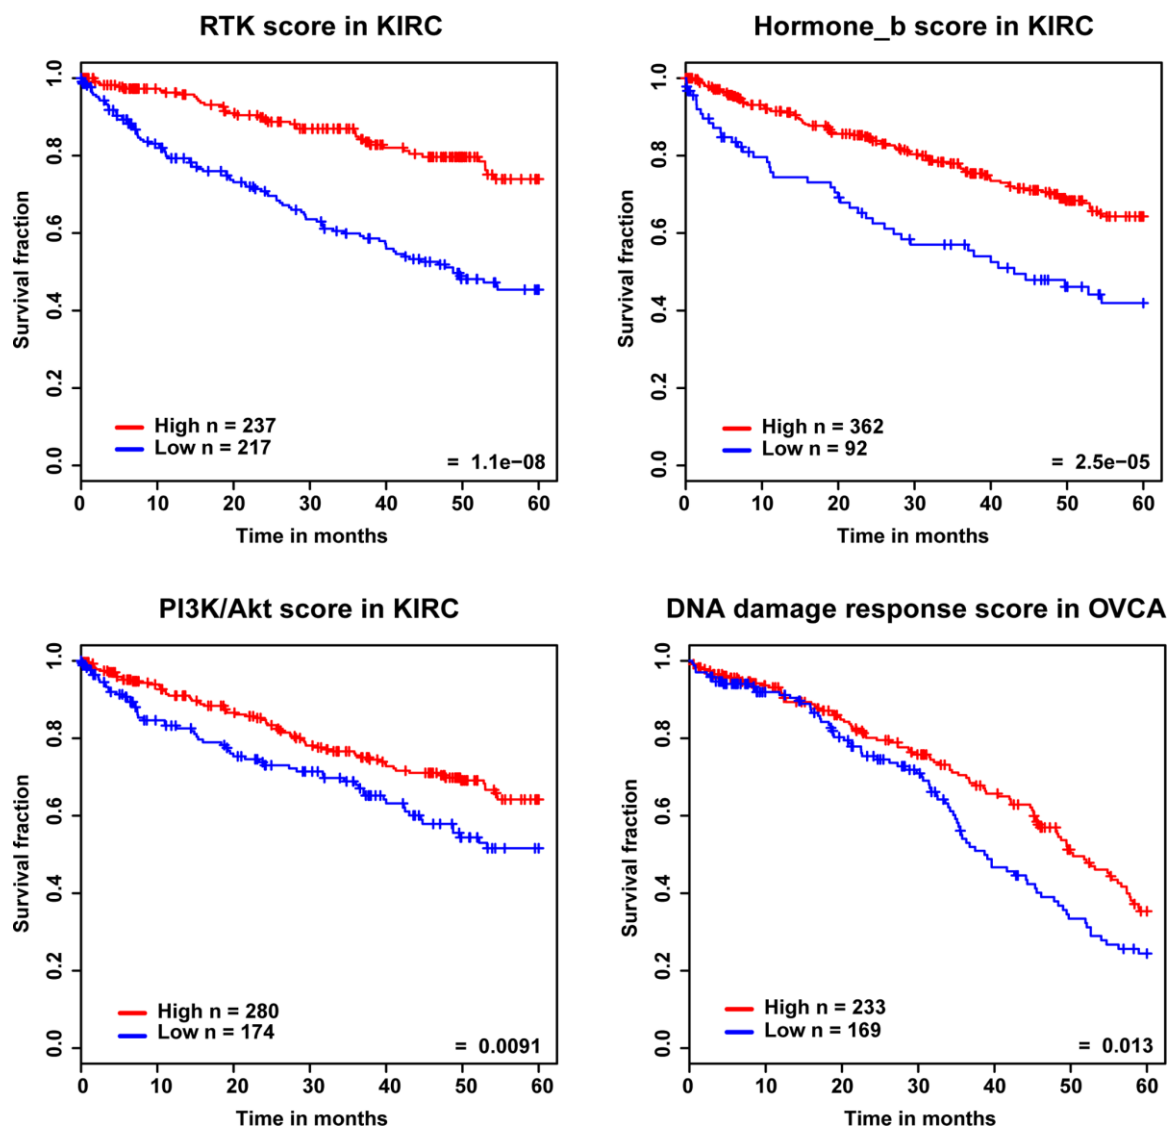

Kaplan-Meier survival curves showing overall survival per tumor lineage, based on the four pathways that validated in the test set of the formal training/test set analysis (by optimized cutoff) and showed marked associations with survival (RTK score in KIRC; hormone\_b score in KIRC; PI3K in KIRC and DNA damage response in OVCA). *P*-values are calculated by log-rank test. For pathway score members and calculation of the pathway score, Supplementary Table 13 and Method.

### Supplementary Figure 13: Visualization of the absolute partial correlation of the protein-protein links in the network

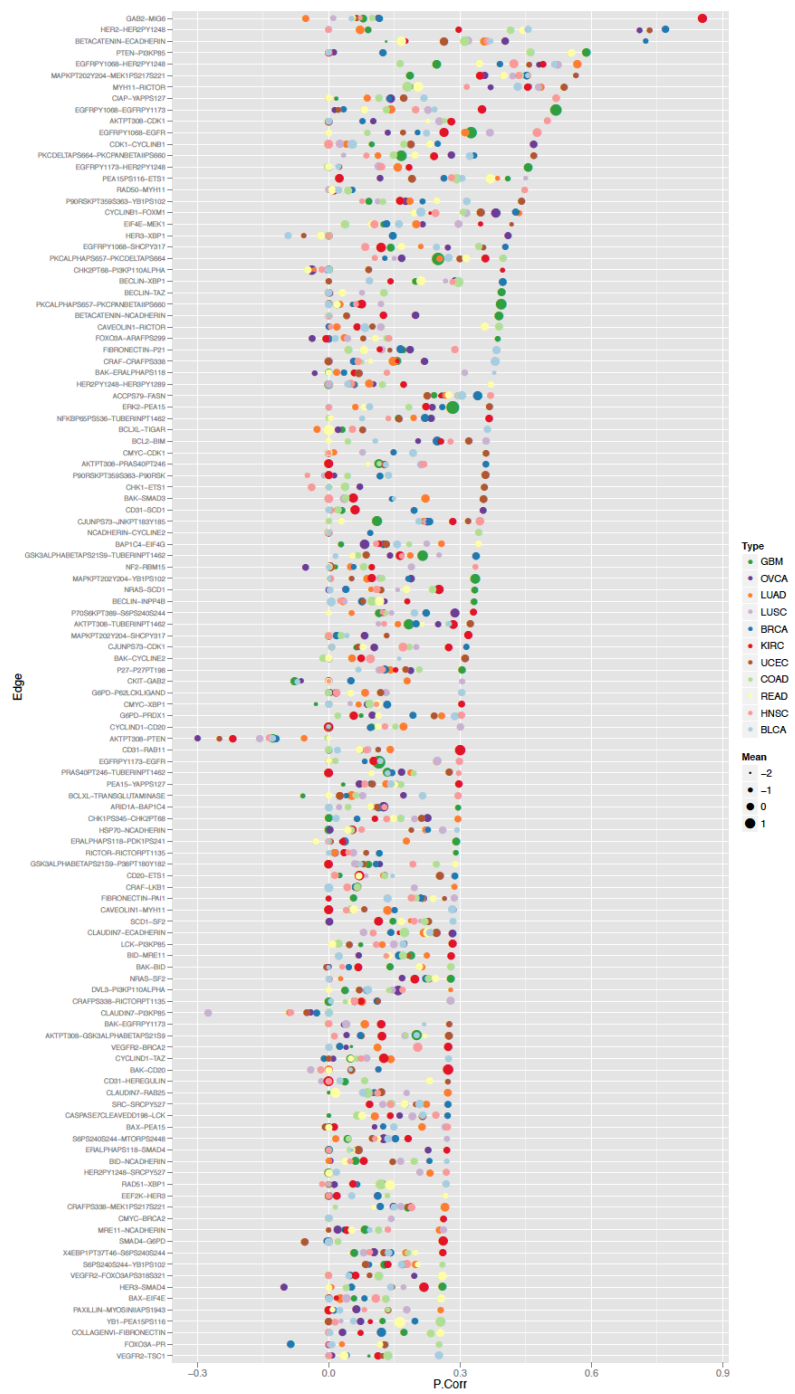

Each row represents a protein-protein link (with at least 0.25 absolute partial correlation in one tumor lineage) shown in Fig. 6. The x-axis shows the absolute partial correlation. The color and size of the circles shows the tumor lineage and mean expression (relative to the global mean) of the lowest expressed protein out of the two proteins from the link, respectively. High-resolution figure is available at <http://bioinformatics.mdanderson.org/main/TCGA/Pancan11/RPPA>.

Supplementary Figure 14: Visualization of pathways coverage by RPPA

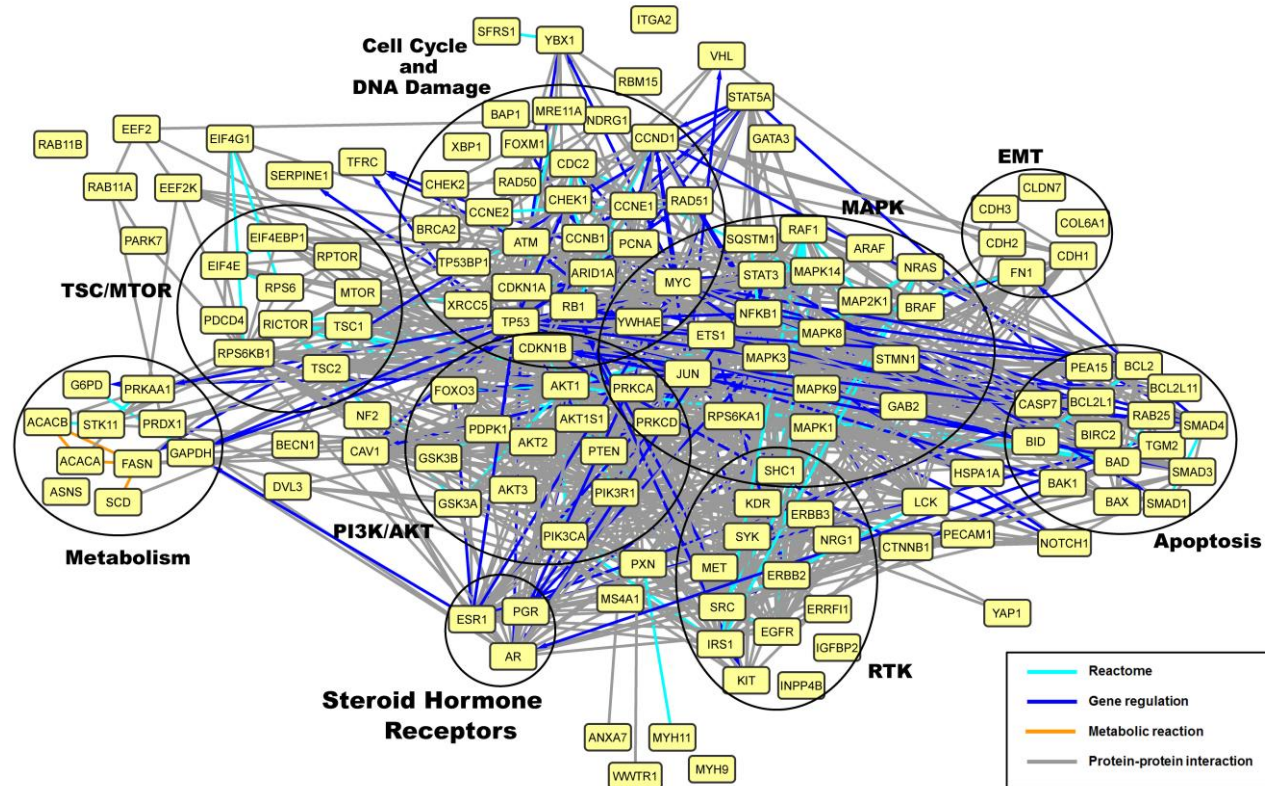

a. Antibody names were converted to gene names for input into Netwaker. Interaction information was obtained using prior knowledge from multiple databases (for detailed info, Komurov *et al*<sup>2</sup>. Nodes were assigned to specific pathways based on the KEGG pathway database. Interaction information was obtained from Netwaker as described previously<sup>2</sup>. Once generated, networks were exported for visualization in cytoscape<sup>3</sup>.

**Supplementary Figure 14: Visualization of pathways coverage by RPPA (continued)**

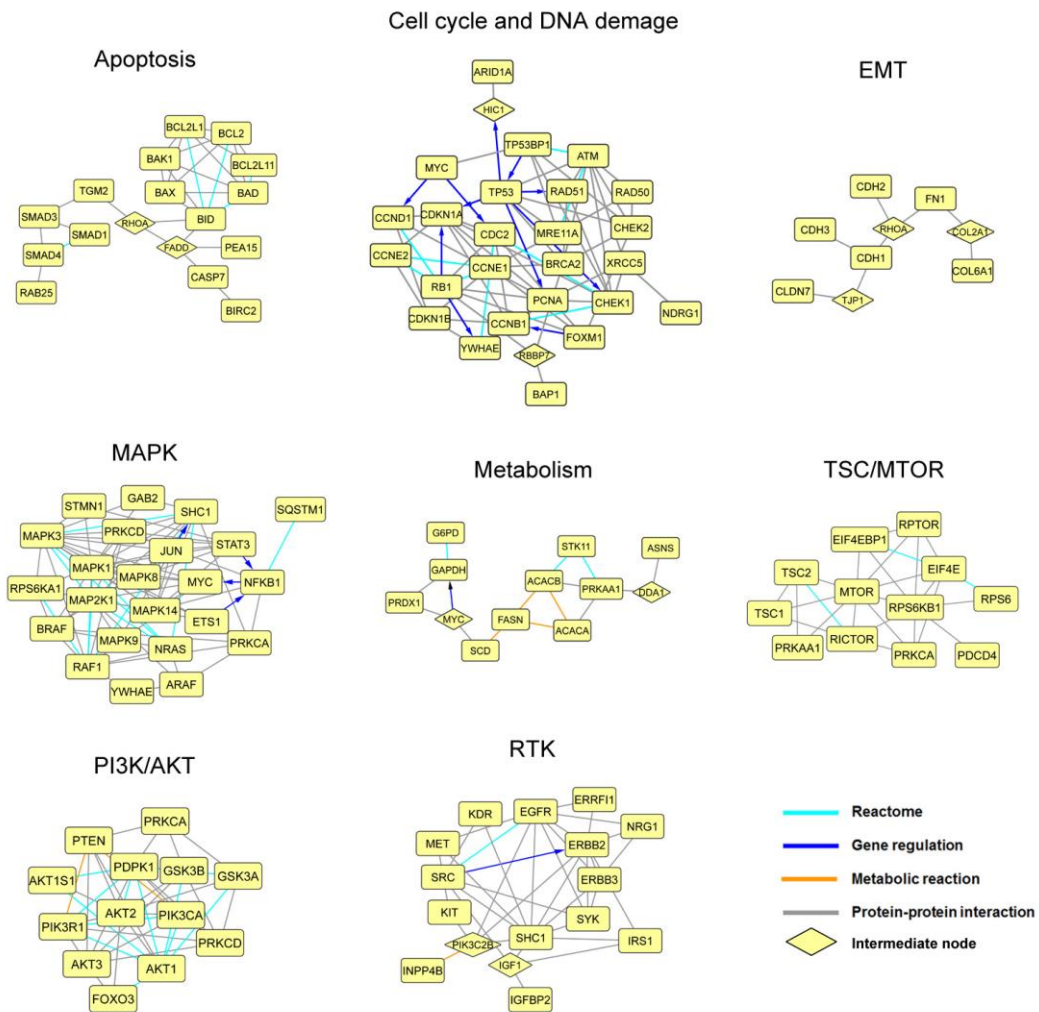

b. Zoomed-in views of pathways of interest. To visualize maximum connectivity of the pathway, intermediate nodes were added using the Netwaker gene connector function.

### Supplementary Figure 15: Redundancy in RPPA antibodies

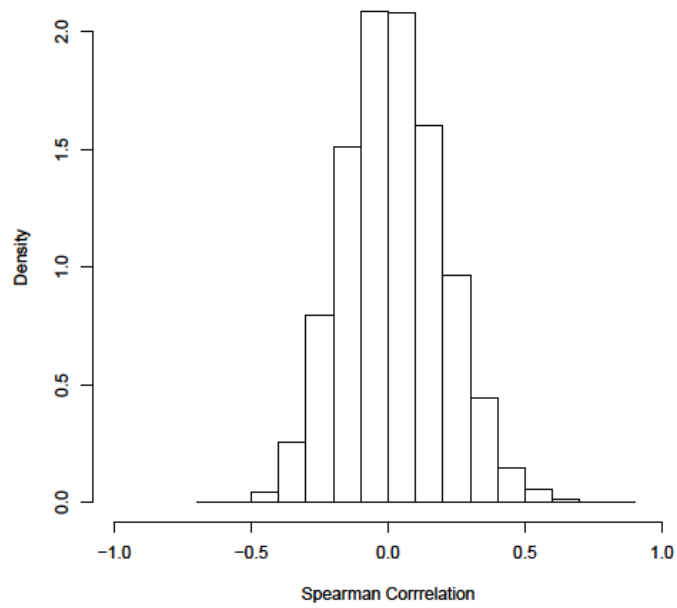

Histogram of Spearman's correlation ( $\rho$ ) of each protein with all the other proteins in the pan-cancer dataset. The mean (expected)  $\rho$  for the distribution is 0.02.



**Supplementary Figure 16: Representative image of RPPA slide**

**a**

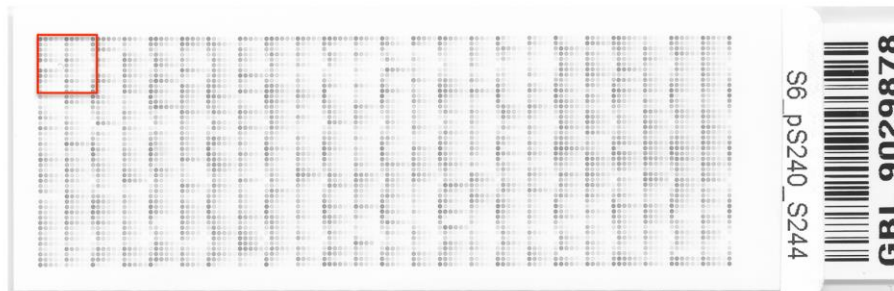

**b**

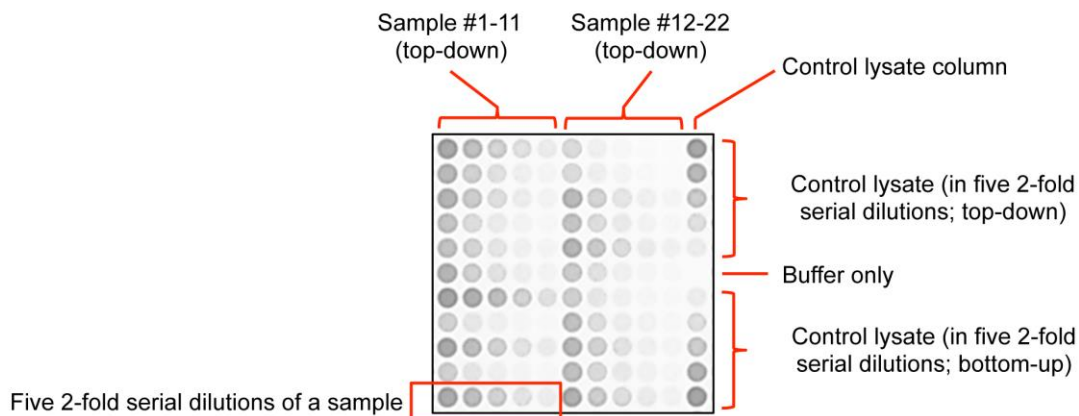

**c**

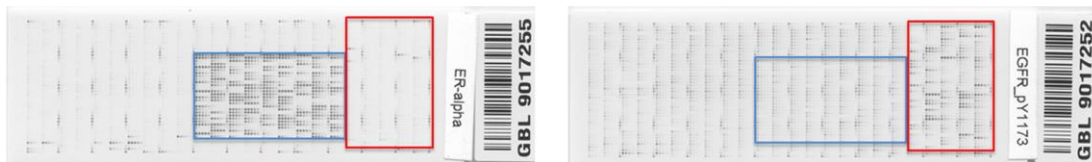

a. Image of a developed RPPA slide stained by phosphorylated S6 (S240/S244) antibody. Each spot represent a sample or control lysate (in different dilutions). An 11x11 grid is highlighted in a red box. Each slide contains 12x4 (total 48) 11x11 grids.

b. Zoomed-in view of an 11x11 grid showing the standard orientation of the samples and control lysate. Each grid contains 22 samples and 1 control lysate. Each sample is represented by 5 spots with 2-fold serial dilution as indicated. Samples are arranged, top-down, in first 10 columns. The last column contains duplicates of control lysate in 2-fold serial dilution. One spot of buffer only is printed in the center of last column.

c. Two representative RPPA images showing distant signal patterns of 2 tumor types. RPPA slides stained by ER-alpha (right) and phosphorylated EGFR (Y1137) (left) are shown. BRCA samples are highlighted by blue box, while GBM samples are highlighted by red box.

## Supplementary Tables

**Supplementary Table 1: Relative HER2 protein and ERBB2 mRNA expression levels in 26 lung adenocarcinoma (LUAD) cell lines**

| LUAD Cell Line | HER2 Protein | ERBB2 mRNA |
|----------------|--------------|------------|
| CALU3          | 3.73         | 15.87      |
| CALU6          | -0.22        | 9.63       |
| H1355          | 0.08         | 11.14      |
| H1395          | 0.05         | 11.30      |
| H1437          | 0.68         | 12.30      |
| H1648          | 0.46         | 12.05      |
| H1650          | 0.96         | 12.23      |
| H1666          | 1.36         | 11.95      |
| H1693          | 1.79         | 12.64      |
| H1819          | 3.25         | 15.51      |
| H1975          | 0.44         | 11.78      |
| H1993          | 0.68         | 11.35      |
| H2009          | 0.62         | 12.04      |
| H2073          | 0.26         | 9.59       |
| H2087          | -0.08        | 10.83      |
| H2126          | 1.07         | 12.56      |
| H2347          | 0.94         | 12.07      |
| H322           | 1.26         | 11.61      |
| H358           | 0.95         | 11.46      |
| H820           | 0.35         | 11.83      |
| HCC1833        | -0.77        | 11.59      |
| HCC193         | 0.77         | 11.39      |
| HCC2279        | 0.14         | 10.73      |
| HCC4006        | 0.18         | 11.38      |
| HCC515         | 0.76         | 11.61      |
| HCC78          | 1.07         | 12.13      |

The first column contains the cell line name. The highlighted cells contain values above the threshold of 1.0 for protein and 14.26 for mRNA (same as those used in Fig. 1). The corresponding plot is shown in Supplementary Figure 2. More cell lines are identified as HER2 positive by protein (7 cell lines) than by mRNA (2 cell lines).

**Supplementary Table 2: Top 25 Protein discriminators for RBN clusters**

| Discriminators for cluster_A1 |                   |              |
|-------------------------------|-------------------|--------------|
| Protein                       | Fold change (Log) | adj. P-value |
| COLLAGENVI                    | 1.60              | 1.26E-264    |
| GATA3                         | 1.08              | 1.11E-151    |
| RBM15                         | -1.13             | 1.57E-133    |
| RAB11                         | 0.65              | 1.88E-124    |
| BETACATENIN                   | -1.27             | 1.30E-87     |
| S6                            | -0.80             | 1.26E-86     |
| BCL2                          | 0.79              | 3.28E-76     |
| SYK                           | -0.87             | 1.48E-71     |
| HSP70                         | 1.11              | 2.98E-71     |
| GAPDH                         | -1.75             | 9.33E-67     |
| ACETYLATUBULIN.LYS40.         | -1.18             | 6.31E-64     |
| ERALPHA                       | 1.22              | 2.05E-61     |
| BID                           | 0.36              | 1.75E-60     |
| FASN                          | 1.06              | 7.85E-60     |
| NF2                           | -0.45             | 9.17E-58     |
| TRFC                          | -1.11             | 2.15E-51     |
| PR                            | 0.29              | 4.76E-48     |
| CAVEOLIN1                     | 1.17              | 8.70E-48     |
| ERK2                          | -0.53             | 5.97E-47     |
| MTOR                          | -0.34             | 1.27E-44     |
| AR                            | 0.64              | 3.02E-44     |
| GSK3ALPHABETA                 | -0.28             | 4.95E-43     |
| CYCLIND1                      | 0.27              | 8.72E-43     |
| FIBRONECTIN                   | 0.72              | 1.33E-42     |
| BRAF                          | -0.59             | 3.86E-40     |

| Discriminators for cluster_A2 |                   |              |
|-------------------------------|-------------------|--------------|
| Protein                       | Fold change (Log) | adj. P-value |
| GATA3                         | 2.46              | 0.00E+00     |
| ERALPHA                       | 2.87              | 0.00E+00     |
| FASN                          | 1.78              | 0.00E+00     |
| AR                            | 1.22              | 1.22E-291    |
| INPP4B                        | 1.48              | 5.29E-248    |
| ERALPHAPS118                  | 0.60              | 3.50E-179    |
| EGFR                          | -0.71             | 5.12E-162    |
| PKCALPHAPS657                 | -0.70             | 2.96E-159    |
| BCL2                          | 0.78              | 2.94E-151    |
| PKCALPHA                      | -0.73             | 1.09E-146    |
| PR                            | 0.34              | 1.48E-140    |
| ACC1                          | 0.73              | 9.05E-97     |
| BIM                           | 0.51              | 7.05E-92     |
| NDRG1PT346                    | -1.02             | 3.04E-90     |
| NCADHERIN                     | -0.43             | 4.27E-88     |
| CYCLINE1                      | -0.57             | 1.01E-80     |
| VEGFR2                        | 0.55              | 4.40E-79     |
| SRCPY416                      | -0.57             | 7.50E-79     |
| NOTCH1                        | -0.27             | 1.35E-71     |
| YB1PS102                      | -0.24             | 3.68E-71     |
| PKK1PS241                     | 0.30              | 9.81E-69     |
| YAP                           | -0.30             | 4.99E-66     |
| IRS1                          | 0.28              | 1.63E-62     |
| FIBRONECTIN                   | 0.58              | 3.47E-60     |
| BRAF                          | -0.59             | 3.86E-40     |

| Discriminators for cluster_B |                   |              |
|------------------------------|-------------------|--------------|
| Protein                      | Fold change (Log) | adj. P-value |
| COLLAGENVI                   | -0.93             | 1.54E-199    |
| GATA3                        | -0.85             | 1.58E-193    |
| ERALPHA                      | 1.44              | 1.07E-167    |
| S6                           | 0.73              | 4.50E-147    |
| CYCLINE1                     | 0.79              | 5.11E-143    |
| PR                           | 0.34              | 2.83E-134    |
| ERALPHAPS118                 | 0.51              | 6.87E-134    |
| TRFC                         | 1.21              | 3.45E-124    |
| KU80                         | 0.51              | 1.10E-115    |
| MEK1                         | -0.58             | 1.14E-115    |
| CYCLINB1                     | 1.01              | 1.31E-112    |
| RBM15                        | 0.68              | 1.73E-107    |
| FIBRONECTIN                  | -0.80             | 2.60E-106    |
| CHK2                         | 0.47              | 5.54E-101    |
| X53BP1                       | 0.59              | 6.48E-97     |
| MAPKPT202Y204                | -0.90             | 2.57E-87     |
| AKTPT308                     | 0.81              | 1.10E-84     |
| RAB11                        | -0.35             | 6.03E-83     |
| HSP70                        | -0.81             | 3.43E-82     |
| EEF2                         | 0.66              | 1.46E-80     |
| SRCPY527                     | -0.67             | 3.23E-76     |
| NDRG1PT346                   | -0.90             | 2.30E-70     |
| TRANSGLUTAMINASE             | 0.57              | 5.14E-70     |
| MRE11                        | -0.19             | 9.36E-68     |
| CYCLINE2                     | 0.33              | 3.39E-65     |

| Discriminators for cluster_C |                   |              |
|------------------------------|-------------------|--------------|
| Protein                      | Fold change (Log) | adj. P-value |
| CYCLINE1                     | 1.05              | 3.52E-253    |
| GATA3                        | -0.84             | 8.58E-207    |
| RBM15                        | 0.90              | 9.20E-189    |
| BAP1C4                       | 0.57              | 1.39E-186    |
| FOXMI                        | 0.61              | 2.67E-153    |
| CHK2                         | 0.52              | 8.64E-132    |
| PDK1PS241                    | -0.41             | 1.08E-130    |
| SYK                          | 0.76              | 1.97E-122    |
| GAB2                         | 0.74              | 1.86E-121    |
| CYCLINB1                     | 0.99              | 2.66E-117    |
| SRC                          | -0.46             | 1.85E-115    |
| DVL3                         | 0.41              | 3.64E-113    |
| IGFBP2                       | 1.10              | 1.54E-106    |
| CKIT                         | -0.63             | 3.63E-103    |
| CD49B                        | -0.43             | 4.39E-96     |
| BCL2                         | -0.59             | 1.67E-95     |
| RAB11                        | -0.35             | 1.18E-86     |
| ERALPHA                      | 0.95              | 2.56E-85     |
| VHL                          | 1.28              | 3.36E-85     |
| PDCD4                        | 0.71              | 2.66E-84     |
| CHK2PT68                     | 0.28              | 1.09E-76     |
| JNK2                         | -0.33             | 5.13E-76     |
| CMYC                         | 0.50              | 2.11E-75     |
| AMPKALPHA                    | -0.36             | 2.20E-75     |
| INPP4B                       | -0.74             | 1.81E-74     |

| Discriminators for cluster_D |                   |              |
|------------------------------|-------------------|--------------|
| Protein                      | Fold change (Log) | adj. P-value |
| TIGAR                        | 0.93              | 0.00E+00     |
| CLAUDIN7                     | 1.67              | 0.00E+00     |
| ERALPHA                      | -1.66             | 7.73E-255    |
| MYH11                        | 2.33              | 7.17E-199    |
| EEF2                         | 0.95              | 3.64E-185    |
| PEA15PS116                   | 1.25              | 2.00E-160    |
| RICTOR                       | 1.18              | 2.76E-160    |
| RAB25                        | 0.80              | 1.03E-151    |
| SRC                          | 0.49              | 1.56E-145    |
| AKTPT308                     | -0.99             | 1.43E-144    |
| BCLXL                        | 0.39              | 2.02E-139    |
| ECADHERIN                    | 1.15              | 1.07E-135    |
| YB1                          | 0.46              | 4.84E-120    |
| AR                           | -0.67             | 1.53E-119    |
| AMPKPT172                    | 0.68              | 2.77E-115    |
| CD49B                        | 0.44              | 4.47E-114    |
| TRFC                         | 1.03              | 6.01E-111    |
| CHK2                         | 0.44              | 4.50E-109    |
| RICTORPT1135                 | -0.22             | 4.30E-107    |
| P90RSK                       | 0.37              | 1.81E-106    |
| SYK                          | 0.66              | 8.23E-106    |
| XBP1                         | 0.33              | 1.09E-100    |
| BETACATENIN                  | 0.84              | 6.63E-100    |
| SRCPY416                     | 0.59              | 3.64E-99     |
| CRAFPS338                    | -0.18             | 6.38E-97     |

| Discriminators for cluster_E |                   |              |
|------------------------------|-------------------|--------------|
| Protein                      | Fold change (Log) | adj. P-value |
| FASN                         | 1.33              | 1.24E-117    |
| ERALPHA                      | -1.19             | 4.64E-75     |
| GATA3                        | 0.63              | 1.36E-71     |
| HER2                         | 0.80              | 1.76E-57     |
| FOXMI                        | 0.46              | 4.63E-52     |
| S6                           | 0.50              | 2.48E-46     |
| NCADHERIN                    | -0.40             | 8.95E-46     |
| ACC1                         | 0.61              | 2.10E-42     |
| CYCLINB1                     | 0.71              | 2.27E-36     |
| PEA15                        | -0.32             | 7.77E-35     |
| PKCALPHAPS657                | -0.40             | 1.29E-34     |
| IGFBP2                       | -0.81             | 1.57E-34     |
| RAB25                        | 0.51              | 2.08E-34     |
| MYH11                        | -1.25             | 4.94E-33     |
| DJ1                          | -0.29             | 2.20E-32     |
| ASNS                         | 0.48              | 9.33E-32     |
| ERALPHAPS118                 | -0.30             | 9.33E-32     |
| CAVEOLIN1                    | -0.82             | 1.26E-31     |
| ACCP579                      | 0.46              | 4.98E-31     |
| SMAD3                        | -0.24             | 7.55E-30     |
| AMPKALPHA                    | -0.29             | 1.49E-29     |
| PKCALPHA                     | -0.40             | 2.14E-29     |
| EGFRPY1173                   | -0.53             | 5.75E-27     |
| CD20                         | -0.17             | 1.03E-26     |
| MAPKPT202Y204                | -0.62             | 1.13E-26     |

| Discriminators for cluster_F |                   |              |
|------------------------------|-------------------|--------------|
| Protein                      | Fold change (Log) | adj. P-value |
| GATA3                        | -0.70             | 2.56E-244    |
| AR                           | -0.72             | 4.75E-205    |
| ERALPHA                      | -1.15             | 9.85E-202    |
| PR                           | -0.26             | 5.03E-151    |
| YAP                          | 0.34              | 4.77E-148    |
| HER2PY1248                   | 0.68              | 8.03E-144    |
| SRCPY416                     | 0.57              | 7.36E-142    |
| P70S6KPT389                  | -0.37             | 1.85E-129    |
| CD49B                        | 0.38              | 1.35E-128    |
| NDRG1PT346                   | 0.85              | 8.02E-116    |
| GAB2                         | -0.53             | 1.67E-112    |
| TUBERINPT1462                | -0.29             | 1.68E-102    |
| ERK2                         | -0.40             | 3.02E-102    |
| CDK1                         | 0.22              | 3.85E-96     |
| PAI1                         | 0.66              | 2.23E-90     |
| CAVEOLIN1                    | 0.79              | 1.47E-87     |
| TRANSGLUTAMINASE             | 0.46              | 3.50E-87     |
| RAPTOR                       | -0.26             | 3.47E-86     |
| PI3KP110ALPHA                | -0.24             | 1.89E-83     |
| SMAD3                        | 0.23              | 5.31E-82     |
| PKCDELTA664                  | -0.17             | 4.31E-77     |
| BRCA2                        | 0.20              | 2.13E-76     |
| STAT5ALPHA                   | -0.45             | 4.14E-76     |
| ECADHERIN                    | 0.66              | 8.63E-75     |
| BAX                          | 0.25              | 2.47E-74     |

| Discriminators for cluster_G |                   |              |
|------------------------------|-------------------|--------------|
| Protein                      | Fold change (Log) | adj. P-value |
| NDRG1PT346                   | 3.31              | 0.00E+00     |
| MIG6                         | 0.72              | 0.00E+00     |
| FASN                         | -2.06             | 0.00E+00     |
| CYCLINB1                     | -1.88             | 0.00E+00     |
| AMPKALPHA                    | 0.86              | 0.00E+00     |
| ACC1                         | -1.37             | 0.00E+00     |
| GATA3                        | -0.98             | 6.33E-275    |
| CD20                         | 0.44              | 1.78E-266    |
| GAPDH                        | 2.36              | 1.13E-254    |
| TRANSGLUTAMINASE             | 1.06              | 1.90E-241    |
| ACCP579                      | -0.94             | 3.43E-208    |
| CHK2                         | -0.64             | 1.31E-200    |
| PR                           | -0.39             | 1.37E-190    |
| CLAUDIN7                     | -1.19             | 2.57E-168    |
| RAB11                        | 0.49              | 2.82E-164    |
| CD31                         | 0.44              | 7.06E-161    |
| PI3KP110ALPHA                | -0.45             | 3.31E-157    |
| BAK                          | 0.66              | 9.56E-153    |
| SMAD1                        | -0.38             | 2.54E-149    |
| CRAF                         | -0.33             | 1.53E-144    |
| DVL3                         | -0.45             | 1.42E-135    |
| PRAS40PT246                  | 0.42              | 6.62E-127    |
| MYH11                        | 1.87              | 7.03E-126    |
| ASNS                         | -0.73             | 6.56E-121    |
| ERK2                         | 0.57              | 7.71E-120    |

| Discriminators for cluster_H |                   |              |
|------------------------------|-------------------|--------------|
| Protein                      | Fold change (Log) | adj. P-value |
| PKCDELTA664                  | 0.77              | 0.00E+00     |
| ERK2                         | 1.36              | 0.00E+00     |
| ACETYLATUBULIN.LYS40.        | 2.51              | 0.00E+00     |
| EGFR                         | 1.35              | 0.00E+00     |
| EGFRPY1173                   | 1.93              | 4.41E-283    |
| NOTCH1                       | 0.75              | 1.22E-280    |
| PKCALPHA657                  | 1.22              | 3.19E-266    |
| PKCALPHA                     | 1.34              | 5.12E-266    |
| PEA15                        | 0.97              | 7.44E-265    |
| ECADHERIN                    | -2.17             | 4.08E-228    |
| MYOSINIIAPS1943              | -0.84             | 1.13E-221    |
| HER3PY1298                   | 0.49              | 2.84E-186    |
| VHL                          | -2.62             | 2.42E-184    |
| P70S6KPT389                  | 0.77              | 2.30E-177    |
| NCADHERIN                    | 0.80              | 5.95E-170    |
| TUBERINPT1462                | 0.67              | 5.95E-168    |
| PDCD4                        | -1.37             | 1.60E-163    |
| JNKPT183Y185                 | 0.56              | 4.70E-159    |
| EGFRPY1068                   | 2.22              | 6.04E-159    |
| SRCPY416                     | 1.07              | 1.67E-158    |
| VEGFR2                       | -1.02             | 1.51E-155    |
| MAPKPT202Y204                | 1.56              | 1.17E-151    |
| CLAUDIN7                     | -1.50             | 7.27E-147    |
| RAB25                        | -1.06             | 1.80E-137    |
| CMYC                         | -0.89             | 1.54E-127    |

Top 25 protein discriminators (according to adjusted *P*-value (Benjamini Hochberg)) of each RBN clusters are listed. Positive values (highlighted in red) in Fold change (Log) column indicate a fold change increase, in log scale, of the protein level of particular protein comparing to that in all other clusters by LIMMA analysis, while negative values indicate fold change decrease. Full list is available at <http://bioinformatics.mdanderson.org/main/TCGA/Pancan11/RPPA>.



**Supplementary Table 3: Top 25 RNA discriminators for RBN clusters**

| RBN clusters |          |              |          |           |          |            |          |          |
|--------------|----------|--------------|----------|-----------|----------|------------|----------|----------|
| A1           | A2       | B            | C        | D         | E        | F          | G        | H        |
| ANKRD30A     | GATA3    | RPL13AP20    | EEF1A1P9 | CLCA1     | PSME4    | SCEL       | ACSM2A   | PMP2     |
| GATA3        | TBC1D9   | RPSAP9       | APOA1    | CDX1      | GRHL1    | GRIK3      | ACSM2B   | AP1M2    |
| TBC1D9       | SLC39A6  | RPS26P11     | SOX17    | NOX1      | PVRL4    | FAM83A     | SLC17A3  | KRT18    |
| SLC39A6      | ANKRD30A | HNRNPA1L2    | KLHL14   | PHGR1     | GATA3    | SFN        | AGXT2    | OLIG2    |
| RABEP1       | RABEP1   | NCRNA00182   | CLDN16   | FABP1     | TFAP2C   | FOXE1      | SLC22A2  | KRT8     |
| ZNF552       | ZNF552   | LOC100133161 | MEIS1    | MEP1A     | HKDC1    | FGFBP1     | NAT8     | HEPACAM  |
| LMX1B        | ESR1     | FTHL3        | LRRTM1   | REG4      | ESRP1    | IL1F5      | GLYAT    | PRSS8    |
| ADIPOQ       | WWP1     | RPL21        | ZNF503   | REG3A     | GRHL2    | TMPRSS11E2 | UGT2A3   | GFAP     |
| SCGB2A2      | XBP1     | SOX17        | RBM38    | CDH17     | ELF5     | B3GNT5     | SLC28A1  | ARHGEF5  |
| XBP1         | LMX1B    | LOC100132287 | PRKCI    | CDX2      | GGCT     | SERPINB3   | CUBN     | SPINT1   |
| WWP1         | NAT1     | POTEE        | BCAM     | KRT20     | GAL3ST1  | GPR87      | SLC17A4  | GRB7     |
| ABCC11       | TRPS1    | PGAM4        | NPR1     | GPA33     | SLC5A6   | MALL       | BHMT     | NCAN     |
| ESR1         | HKDC1    | LOC100133331 | PAX8     | SPINK4    | GTPBP4   | LAMP3      | ENPEP    | BAIAP2L1 |
| HKDC1        | PSAT1    | LOC100132247 | CLDN6    | ZG16      | CDC42SE1 | SFTPB      | FXYD2    | EVPL     |
| TRPS1        | KIAA1467 | MSX1         | LYPD1    | MUC17     | F11R     | LAMB3      | GRHL2    | RIPK4    |
| PIP          | C6orf211 | STX18        | WT1      | SLC26A3   | CST3     | ROS1       | SLC6A13  | C1orf61  |
| SPOPL        | GFRA1    | RPL36A       | KCNK15   | RPSAP9    | MASP1    | KLF5       | SLC22A12 | DSG2     |
| GFRA1        | FOXA1    | LIMS3        | FTHL3    | LGALS4    | KRT7     | SFTPA1     | SLC3A1   | HOOK1    |
| SCUBE2       | SPOPL    | FLJ45445     | MUC16    | DEFA6     | RAB25    | GBP6       | ESRP1    | CLDN4    |
| AMN          | GSTP1    | LOC613037    | C14orf4  | HNF4A     | ALDH3B2  | BAIAP2L1   | SLC13A1  | SPINT2   |
| PRLR         | MYB      | DLX5         | UPK3B    | RPL13AP20 | SMARCD2  | GNA15      | SLC22A11 | EPCAM    |
| CILP         | MAGED2   | RPL39        | NR2F6    | RPS26P11  | VGLL1    | KRT6A      | IGSF9    | ELF3     |
| NAT1         | PRLR     | LOC80154     | HDAC7    | QKI       | HBA1     | SPRR1B     | EPB41L4B | FAM83H   |
| TFAP2B       | AMN      | LIMS3        | HSPB1P1  | MUC2      | PAX8     | PERP       | ACAD11   | APC2     |
| PDCD4        | ABCC11   | SBDS         | C15orf39 | RPL21     | CLEC18B  | LAD1       | EPN3     | ESRP1    |

Top 25 RNA discriminators (according to adjusted *P*-value (Benjamini Hochberg)) of each RBN clusters are listed. Discriminators with positive fold change are highlighted in red, while discriminators with negative fold change are highlighted in green. Full list is available at <http://bioinformatics.mdanderson.org/main/TCGA/Pancan11/RPPA>.

**Supplementary Table 4: Top 25 miRNA discriminators for RBN clusters**

| RBN clusters |              |              |              |              |              |              |              |              |
|--------------|--------------|--------------|--------------|--------------|--------------|--------------|--------------|--------------|
| A1           | A2           | B            | C            | D            | E            | F            | G            | H            |
| hsa.mir.190b | hsa.mir.190b | hsa.mir.9    | hsa.mir.21   | hsa.mir.552  | hsa.mir.141  | hsa.mir.944  | hsa.mir.200c | hsa.mir.214  |
| hsa.mir.210  | hsa.mir.378  | hsa.mir.141  | hsa.mir.142  | hsa.mir.194  | hsa.mir.934  | hsa.mir.10b  | hsa.mir.141  | hsa.mir.574  |
| hsa.mir.505  | hsa.mir.342  | hsa.mir.139  | hsa.mir.374a | hsa.mir.192  | hsa.mir.3677 | hsa.mir.27b  | hsa.mir.122  | hsa.mir.212  |
| hsa.mir.135b | hsa.mir.141  | hsa.mir.449a | hsa.mir.101  | hsa.mir.2355 | hsa.mir.96   | hsa.mir.2355 | hsa.mir.183  | hsa.mir.766  |
| hsa.mir.502  | hsa.mir.182  | hsa.mir.429  | hsa.mir.29b  | hsa.mir.215  | hsa.mir.3613 | hsa.mir.223  | hsa.mir.204  | hsa.mir.376a |
| hsa.mir.197  | hsa.mir.135b | hsa.mir.135b | hsa.mir.542  | hsa.mir.3613 | hsa.mir.2355 | hsa.mir.191  | hsa.mir.375  | hsa.mir.132  |
| hsa.mir.501  | hsa.mir.505  | hsa.mir.200a | hsa.mir.19b  | hsa.mir.3607 | hsa.mir.182  | hsa.mir.24   | hsa.mir.30a  | hsa.mir.127  |
| hsa.mir.30a  | hsa.mir.375  | hsa.mir.196b | hsa.mir.22   | hsa.mir.205  | hsa.mir.3127 | hsa.mir.21   | hsa.mir.205  | hsa.mir.137  |
| hsa.mir.532  | hsa.mir.30a  | hsa.mir.449c | hsa.mir.126  | hsa.mir.99b  | hsa.mir.374a | hsa.mir.203  | hsa.mir.1270 | hsa.mir.134  |
| hsa.mir.182  | hsa.mir.3127 | hsa.mir.3613 | hsa.mir.32   | hsa.mir.125a | hsa.mir.200c | hsa.mir.99b  | hsa.mir.126  | hsa.mir.654  |
| hsa.mir.378  | hsa.mir.502  | hsa.mir.449b | hsa.mir.424  | hsa.mir.3065 | hsa.mir.183  | hsa.mir.27a  | hsa.mir.182  | hsa.mir.370  |
| hsa.mir.877  | hsa.mir.221  | hsa.mir.3200 | hsa.mir.197  | hsa.let.7c   | hsa.mir.19b  | hsa.mir.125a | hsa.mir.127  | hsa.mir.323  |
| hsa.mir.222  | hsa.mir.3607 | hsa.mir.96   | hsa.mir.92b  | hsa.mir.3647 | hsa.mir.205  | hsa.mir.190b | hsa.mir.194  | hsa.mir.432  |
| hsa.mir.423  | hsa.mir.532  | hsa.mir.550a | hsa.mir.15a  | hsa.mir.328  | hsa.mir.98   | hsa.mir.452  | hsa.mir.192  | hsa.mir.376b |
| hsa.mir.130b | hsa.mir.224  | hsa.mir.106b | hsa.mir.590  | hsa.mir.3127 | hsa.mir.106b | hsa.mir.22   | hsa.mir.96   | hsa.mir.744  |
| hsa.mir.1307 | hsa.mir.452  | hsa.mir.500a | hsa.mir.30e  | hsa.mir.193a | hsa.mir.32   | hsa.mir.152  | hsa.mir.149  | hsa.mir.197  |
| hsa.mir.92a  | hsa.mir.92a  | hsa.mir.500b | hsa.mir.92a  | hsa.mir.99a  | hsa.mir.590  | hsa.mir.3065 | hsa.mir.190  | hsa.mir.200a |
| hsa.mir.577  | hsa.mir.204  | hsa.mir.135a | hsa.mir.2355 | hsa.mir.3653 | hsa.mir.185  | hsa.mir.141  | hsa.mir.653  | hsa.mir.485  |
| hsa.mir.15b  | hsa.mir.29c  | hsa.let.7g   | hsa.mir.29c  | hsa.mir.1301 | hsa.mir.21   | hsa.mir.221  | hsa.mir.382  | hsa.mir.502  |
| hsa.mir.184  | hsa.mir.96   | hsa.mir.335  | hsa.mir.1226 | hsa.mir.584  | hsa.mir.429  | hsa.mir.30c  | hsa.mir.200b | hsa.mir.324  |
| hsa.mir.455  | hsa.mir.197  | hsa.mir.200b | hsa.mir.195  | hsa.mir.342  | hsa.mir.3647 | hsa.mir.328  | hsa.mir.654  | hsa.mir.221  |
| hsa.mir.188  | hsa.mir.577  | hsa.mir.130b | hsa.mir.582  | hsa.mir.3677 | hsa.mir.30e  | hsa.mir.511  | hsa.mir.203  | hsa.mir.222  |
| hsa.mir.362  | hsa.mir.27b  | hsa.mir.3615 | hsa.mir.152  | hsa.mir.365  | hsa.mir.142  | hsa.mir.3130 | hsa.mir.425  | hsa.mir.200b |
| hsa.mir.942  | hsa.mir.222  | hsa.mir.18a  | hsa.mir.200c | hsa.mir.378c | hsa.mir.204  | hsa.mir.29c  | hsa.mir.379  | hsa.mir.329  |
| hsa.mir.324  | hsa.mir.140  | hsa.mir.19b  | hsa.mir.374b | hsa.mir.7    | hsa.mir.19a  | hsa.mir.185  | hsa.mir.130b | hsa.mir.487b |

Top 25 miRNA discriminators (according to adjusted *P*-value (Benjamini Hochberg)) of each RBN clusters are listed. Discriminators with positive fold change are highlighted in red, while discriminators with negative fold change are highlighted in green. Full list is available at <http://bioinformatics.mdanderson.org/main/TCGA/Pancan11/RPPA>.

**Supplementary Table 5: Top 25 Mutation discriminators for RBN clusters**

| RBN clusters |          |         |         |          |         |         |        |         |
|--------------|----------|---------|---------|----------|---------|---------|--------|---------|
| A1           | A2       | B       | C       | D        | E       | F       | G      | H       |
| CDH1         | GATA3    | PTEN    | TP53    | APC      | TP53    | TP53    | VHL    | EGFR    |
| PIK3CA       | TP53     | CTNNB1  | PIK3CA  | KRAS     | VHL     | CSMD3   | TP53   | PTEN    |
| TP53         | PIK3CA   | PIK3R1  | VHL     | TCF7L2   | PTEN    | LRP1B   | PBRM1  | VHL     |
| VHL          | VHL      | ARID1A  | PBRM1   | SMAD4    | KRAS    | TTN     | PIK3CA | APC     |
| TTN          | CSMD3    | PIK3CA  | PTEN    | FBXW7    | CSMD3   | CDKN2A  | BAP1   | CSMD3   |
| MUC17        | TTN      | CTCF    | MUC16   | NRAS     | MAP3K1  | USH2A   | MUC4   | LRP1B   |
| ARID1A       | APC      | RPL22   | TTN     | ACVR2A   | PKHD1   | FAM135B | KRAS   | PIK3R1  |
| CSMD3        | PBRM1    | ARID5B  | ARID1A  | TGFBR2   | ZNF804A | NOTCH1  | CSMD3  | PBRM1   |
| GPR98        | LRP1B    | WDFY4   | MLL2    | EVC2     | NPAP1   | ZFHX4   | RYR2   | ODZ1    |
| PTEN         | MAP3K1   | ZFHX3   | FRG1B   | VHL      | DPP10   | MUC16   | APC    | KRAS    |
| MAP3K1       | USH2A    | CSDE1   | PCDH11X | SEC63    | COL5A1  | RYR2    | ZFHX4  | CDH10   |
| DNAH9        | DNAH5    | WDR87   | FLG     | KIAA1804 | FAT2    | VHL     | SETD2  | FMN2    |
| ANK2         | KRAS     | FBXW7   | MLL3    | PRDM2    | CDH18   | FAT1    | TTN    | FBXW7   |
| APC          | PLEC     | GIGYF2  | CDKN2A  | PTEN     | ASTN2   | CDH10   | MUC16  | FAT4    |
| PCDH15       | FBN2     | MDN1    | SDK1    | AXIN2    | CDH10   | PCLO    | FLG    | CSMD1   |
| MUC16        | CDKN2A   | LRRFIP1 | FAT4    | FAT4     | KDR     | KEAP1   | GATA3  | PIK3CA  |
| SI           | FRAS1    | TAF1    | SPTA1   | TECTA    | COL3A1  | ZNF804A | FAT1   | GPR112  |
| CSMD2        | ZNF804A  | RGPD3   | SYNE1   | FAT2     | RP1     | MLL2    | PTPRD  | BIRC6   |
| HRNR         | PCDH15   | PPIG    | CTNND2  | ATP10A   | PAPPA   | ZNF536  | PIK3R1 | GATA3   |
| FBN2         | MUC16    | NUP98   | NOTCH1  | DNMT1    | APC     | XIRP2   | BAI3   | FAT1    |
| FAT1         | SYNE1    | SMG1    | MUC4    | SACS     | N4BP2   | COL11A1 | LRP1B  | TP53    |
| SETD2        | CDH10    | MKI67   | PCLO    | GRIK3    | NLRP5   | SI      | RB1    | KEL     |
| MLL2         | FLG      | GOLGA4  | KRAS    | SMAD2    | ATP8A2  | PCDH11X | CDH10  | TNR     |
| PBRM1        | ADAMTS12 | GEN1    | TCHH    | HYDIN    | ZNFX1   | NAV3    | SPTA1  | ZNF804B |
| LRP1         | MUC17    | MUC5B   | CTNNA2  | COL6A3   | GRID1   | PAPPA2  | RELN   | BAI3    |

Top 25 mutation discriminators (according to information gain) of each RBN clusters are listed. Mutations enriched in cluster are highlighted in red, while mutations depleted in cluster are highlighted in green. Full list is available at <http://bioinformatics.mdanderson.org/main/TCGA/Pancan11/RPPA>.

**Supplementary Table 6: Top 25 co-mutations in cluster\_F specified for TP53 wild-type and mutation**

| Cases with co-mutation (n, (%)) | n=79           |              |
|---------------------------------|----------------|--------------|
|                                 | TP53 wild-type | TP53 mutated |
| CSMD3                           | 9 (11%)        | 36 (43%)     |
| LRP1B                           | 7 (9%)         | 31 (37%)     |
| TTN                             | 7 (9%)         | 51 (61%)     |
| CDKN2A                          | 0 (0%)         | 18 (22%)     |
| USH2A                           | 2 (3%)         | 15 (18%)     |
| FAM135B                         | 4 (5%)         | 15 (18%)     |
| NOTCH1                          | 5 (6%)         | 15 (18%)     |
| ZFHX4                           | 3 (4%)         | 19 (23%)     |
| MUC16                           | 8 (10%)        | 26 (31%)     |
| RYR2                            | 6 (8%)         | 25 (30%)     |
| FAT1                            | 1 (1%)         | 20 (24%)     |
| CDH10                           | 1 (1%)         | 7 (8%)       |
| PCLO                            | 5 (6%)         | 24 (29%)     |
| KEAP1                           | 3 (4%)         | 7 (8%)       |
| ZNF804A                         | 2 (3%)         | 11 (13%)     |
| MLL2                            | 7 (9%)         | 12 (14%)     |
| ZNF536                          | 3 (4%)         | 13 (16%)     |
| XIRP2                           | 2 (3%)         | 12 (14%)     |
| COL11A1                         | 0 (0%)         | 10 (12%)     |
| SI                              | 1 (1%)         | 10 (12%)     |
| PCDH11X                         | 3 (4%)         | 10 (12%)     |
| NAV3                            | 0 (0%)         | 15 (18%)     |
| PAPPA2                          | 1 (1%)         | 13 (16%)     |

Supplementary Table 7: Correspondence between RBN protein clusters and mRNA clusters

|              | RPPA RBN Cluster                                  | A1         | A2         | B                        | C                        | D                                      | E                        | F                                                                                                                        | G          | H        |
|--------------|---------------------------------------------------|------------|------------|--------------------------|--------------------------|----------------------------------------|--------------------------|--------------------------------------------------------------------------------------------------------------------------|------------|----------|
| mRNA Cluster | Dominant Tissues                                  | BRCA (130) | BRCA (359) | UCEC (252),<br>BLCA (17) | OVCA (182),<br>UCEC (23) | COAD (124),<br>READ (52),<br>BLCA (27) | BRCA (151),<br>BLCA (40) | LUAD (228),<br>HNSC (204),<br>LUSC (165),<br>BRCA (47),<br>BLCA (27), KIRC<br>(26), UCEC (25),<br>OVCA (14),<br>COAD (5) | KIRC (407) | GBM (72) |
| 1            | BLCA (65)                                         | 0          | 0          | 1                        | 0                        | 18                                     | 38                       | 11                                                                                                                       | 0          | 0        |
| 4            | HNSC (205), LUSC<br>(144), BLCA (34),<br>LUAD (6) | 0          | 0          | 14                       | 0                        | 6                                      | 3                        | 367                                                                                                                      | 0          | 0        |
| 6            | GBM (72)                                          | 0          | 1          | 8                        | 1                        | 0                                      | 2                        | 4                                                                                                                        | 0          | 72       |
| 7            | BRCA (573)                                        | 124        | 358        | 1                        | 0                        | 2                                      | 78                       | 11                                                                                                                       | 0          | 0        |
| 8            | BRCA (116)                                        | 6          | 0          | 1                        | 0                        | 1                                      | 72                       | 36                                                                                                                       | 0          | 1        |
| 9            | KIRC (432)                                        | 0          | 0          | 0                        | 0                        | 0                                      | 0                        | 25                                                                                                                       | 407        | 0        |
| 10           | LUAD (220), LUSC (13)                             | 0          | 0          | 5                        | 0                        | 0                                      | 0                        | 228                                                                                                                      | 0          | 0        |
| 11           | UCEC (291)                                        | 0          | 0          | 244                      | 23                       | 0                                      | 0                        | 24                                                                                                                       | 0          | 0        |
| 15           | COAD (131), READ<br>(55)                          | 0          | 0          | 6                        | 1                        | 176                                    | 0                        | 8                                                                                                                        | 0          | 0        |
| 16           | OVCA (200)                                        | 1          | 0          | 4                        | 180                      | 0                                      | 0                        | 14                                                                                                                       | 0          | 1        |

Contingency table showing how many samples fall in a given RBN protein cluster (columns) vs. mRNA cluster (rows). mRNA clusters were obtained from Hoadley et al (personal communication). Only samples that are common between the mRNA and protein datasets are considered. mRNA clusters with too few common samples are not shown. Numbers  $\geq 10$  are highlighted. Most of the protein clusters predominantly correspond to a single mRNA cluster, as one would expect. However, interestingly, mRNA clusters are derived from a pool of about 20,000 genes, whereas only 181 proteins and phosphoproteins are used to derive the protein clusters. Such a level of agreement seems to validate the protein data, as well as the choice of proteins. Notable exceptions are cluster\_E and F. Cluster\_E brings together breast basal and HER2 samples with some bladder samples that have high HER2. Cluster\_F has a squamous-like signature with HNSC, LUSC and LUAD being dominant tissues. LUAD is a separate cluster in mRNA.



**Supplementary Table 8: Cross-tabulation of how samples fall within RBN vs. MC clusters**

|             |     | RBN Clusters |     |     |     |     |    |     |     |    |
|-------------|-----|--------------|-----|-----|-----|-----|----|-----|-----|----|
|             |     | A1           | A2  | B   | C   | D   | E  | F   | G   | H  |
| MC Clusters | I   | 0            | 2   | 0   | 0   | 84  | 1  | 0   | 0   | 0  |
|             | IIa | 0            | 2   | 0   | 6   | 0   | 50 | 14  | 0   | 0  |
|             | IIb | 0            | 0   | 0   | 0   | 0   | 1  | 13  | 1   | 61 |
|             | III | 0            | 105 | 31  | 96  | 48  | 46 | 104 | 65  | 20 |
|             | IV  | 1            | 91  | 132 | 122 | 71  | 61 | 230 | 136 | 77 |
|             | V   | 142          | 34  | 76  | 67  | 128 | 8  | 144 | 107 | 8  |
|             | VI  | 5            | 15  | 24  | 22  | 75  | 3  | 201 | 40  | 24 |
|             | VII | 10           | 130 | 106 | 94  | 60  | 43 | 134 | 75  | 21 |

The table shows that most of the MC clusters don't correspond to a single dominant RBN cluster, but are spread out across several RBN clusters. That shows that the two clustering approaches are different and they reveal different insights, which are mentioned in the main text. Notable exceptions include: (i) MC cluster\_I, which has a dominant colorectal signature (corresponding to RBN cluster\_D) due to the proteins phospho-PEA15, YB1, and ETS1, (ii) MC cluster\_IIa, which has a dominant HER2 signature (corresponding to RBN cluster\_E), (iii) MC cluster\_IIb, which has a dominant EGFR signature, corresponding to GBM (RBN cluster\_H), and (iv) RBN cluster\_A1, which has a dominant breast reactive signature (corresponding to MC cluster\_V). However, even in those exceptions, a one-to-one correspondence doesn't quite exist because the reverse relationship doesn't hold; e.g. even though MC cluster\_I predominantly has COAD/READ samples from RBN cluster\_D, RBN cluster\_D does not predominantly have samples from MC cluster\_I. It has many more samples in common with MC cluster\_V.

**Supplementary Table 9: Top 25 Protein discriminators for MC clusters**

| Discriminators for cluster_I |                   |              |
|------------------------------|-------------------|--------------|
| Protein                      | Fold change (Log) | adj. P-value |
| PEA15PS116                   | 3.42              | 0.00E+00     |
| YB1                          | 0.88              | 5.63E-112    |
| EEF2                         | 1.11              | 1.67E-74     |
| ETS1                         | 0.93              | 3.95E-68     |
| EGFRPY1173                   | -0.66             | 8.18E-34     |
| NRAS                         | -0.29             | 5.65E-25     |
| CMETPY1235                   | -0.18             | 5.72E-22     |
| X1433EPSILON                 | -0.19             | 9.12E-22     |
| SF2                          | -0.23             | 4.11E-20     |
| STATHMIN                     | -0.23             | 2.24E-19     |
| SMAD4                        | -0.20             | 1.94E-18     |
| ARAFPS299                    | -0.24             | 1.37E-17     |
| SCD1                         | -0.26             | 1.68E-16     |
| FOXO3A                       | -0.20             | 2.27E-15     |
| EGFRPY1068                   | -0.75             | 6.43E-15     |
| CRAFPS338                    | -0.13             | 9.86E-15     |
| ERK2                         | 0.38              | 6.94E-14     |
| BETACATENIN                  | 0.57              | 6.94E-14     |
| CD31                         | -0.24             | 6.94E-14     |
| HER2PY1248                   | -0.39             | 6.94E-14     |
| HER3PY1298                   | -0.18             | 1.09E-13     |
| RBM15                        | 0.42              | 2.09E-13     |
| RICTORPT1135                 | -0.15             | 4.65E-13     |
| P53                          | -0.39             | 6.82E-13     |
| MRE11                        | -0.15             | 1.16E-12     |

| Discriminators for cluster_Ila |                   |              |
|--------------------------------|-------------------|--------------|
| Protein                        | Fold change (Log) | adj. P-value |
| HER2                           | 2.59              | 1.72E-289    |
| HER2PY1248                     | 2.04              | 2.52E-251    |
| ERALPHA                        | -1.76             | 1.64E-58     |
| EGFRPY1068                     | 1.25              | 6.04E-33     |
| BCL2                           | -0.73             | 6.33E-32     |
| GATA3                          | -0.63             | 2.02E-23     |
| HER3PY1298                     | 0.24              | 1.14E-19     |
| EGFRPY1173                     | -0.49             | 2.87E-16     |
| PR                             | -0.22             | 6.23E-15     |
| FASN                           | 0.69              | 8.08E-14     |
| DJ1                            | -0.31             | 6.93E-13     |
| PEA15PS116                     | -0.54             | 9.07E-11     |
| P70S6K                         | 0.28              | 5.69E-10     |
| P27                            | -0.23             | 2.01E-09     |
| ERALPHAPS118                   | -0.27             | 7.23E-09     |
| BIM                            | -0.31             | 2.12E-08     |
| CYCLINB1                       | 0.51              | 3.14E-08     |
| SHCPY317                       | 0.21              | 3.64E-07     |
| ASNS                           | 0.35              | 8.53E-07     |
| ACCP579                        | 0.32              | 3.34E-06     |
| COLLAGENVI                     | -0.29             | 7.97E-06     |
| S6PS240S244                    | 0.34              | 8.41E-06     |
| SCD1                           | 0.16              | 8.41E-06     |
| CAVEOLIN1                      | -0.50             | 1.31E-05     |
| XRCC1                          | -0.14             | 2.58E-05     |

| Discriminators for cluster_Ilb |                   |              |
|--------------------------------|-------------------|--------------|
| Protein                        | Fold change (Log) | adj. P-value |
| EGFRPY1173                     | 3.54              | 0.00E+00     |
| EGFRPY1068                     | 4.24              | 0.00E+00     |
| EGFR                           | 1.55              | 3.53E-236    |
| HER2PY1248                     | 1.07              | 4.27E-81     |
| SRCPY416                       | 0.57              | 4.99E-22     |
| PEA15PS116                     | -0.60             | 7.60E-14     |
| HER2                           | -0.44             | 4.21E-11     |
| P70S6KPT389                    | -0.24             | 2.59E-08     |
| SHCPY317                       | 0.19              | 3.63E-06     |
| NOTCH1                         | 0.16              | 7.16E-06     |
| SMAD1                          | 0.15              | 1.10E-05     |
| ETS1                           | -0.26             | 3.40E-05     |
| MEK1PS217S221                  | -0.19             | 6.34E-04     |
| CDK1                           | 0.10              | 8.93E-03     |
| NDRG1PT346                     | -0.31             | 1.27E-02     |
| PKCDELTA664                    | 0.08              | 1.27E-02     |
| PCADHERIN                      | 0.08              | 1.30E-02     |
| SYK                            | -0.21             | 1.47E-02     |
| BETACATENIN                    | 0.24              | 1.69E-02     |
| AKT                            | 0.14              | 1.89E-02     |
| IRS1                           | -0.10             | 2.39E-02     |
| MTORPS2448                     | -0.07             | 2.56E-02     |
| RAD51                          | -0.08             | 2.56E-02     |
| S6PS240S244                    | -0.20             | 2.90E-02     |
| PTEN                           | -0.15             | 3.17E-02     |

| Discriminators for cluster_III |                   |              |
|--------------------------------|-------------------|--------------|
| Protein                        | Fold change (Log) | adj. P-value |
| HER2PY1248                     | -0.61             | 9.67E-125    |
| EGFRPY1173                     | -0.60             | 4.14E-112    |
| EGFRPY1068                     | -0.98             | 1.88E-99     |
| PEA15PS116                     | -0.64             | 1.00E-72     |
| BRAF                           | 0.45              | 4.72E-62     |
| ETS1                           | -0.39             | 1.18E-51     |
| BAP1C4                         | 0.25              | 1.01E-47     |
| EGFR                           | -0.29             | 7.38E-46     |
| MTOR                           | 0.20              | 2.65E-43     |
| ERALPHAPS118                   | 0.26              | 1.10E-38     |
| ERALPHA                        | 0.60              | 7.74E-36     |
| FIBRONECTIN                    | -0.38             | 1.85E-33     |
| MYH11                          | -0.78             | 9.78E-32     |
| ECADHERIN                      | 0.52              | 9.56E-31     |
| RBM15                          | 0.32              | 1.03E-30     |
| PAI1                           | -0.45             | 1.91E-30     |
| CAVEOLIN1                      | -0.54             | 1.06E-29     |
| COLLAGENVI                     | -0.30             | 3.00E-29     |
| HSP70                          | -0.43             | 3.28E-29     |
| SRCPY416                       | -0.29             | 3.70E-29     |
| X53BP1                         | 0.28              | 1.80E-27     |
| TAZ                            | -0.15             | 6.80E-27     |
| YB1                            | -0.20             | 3.05E-26     |
| LCK                            | -0.20             | 1.08E-25     |
| CHK2                           | 0.20              | 1.46E-25     |

| Discriminators for cluster_IV |                   |              |
|-------------------------------|-------------------|--------------|
| Protein                       | Fold change (Log) | adj. P-value |
| EGFRPY1173                    | -0.58             | 2.98E-145    |
| PEA15PS116                    | -0.60             | 8.22E-89     |
| HER2PY1248                    | -0.40             | 8.28E-80     |
| GSK3PS9                       | 0.43              | 8.24E-64     |
| GSK3ALPHABETAPS21S9           | 0.44              | 2.41E-63     |
| AKTPS473                      | 0.54              | 1.96E-58     |
| EGFRPY1068                    | -0.59             | 4.17E-52     |
| TUBERINPT1462                 | 0.21              | 1.59E-51     |
| HER2                          | -0.37             | 3.12E-51     |
| NDRG1PT346                    | 0.54              | 2.73E-46     |
| PKCPANBETAIIIPS660            | 0.28              | 9.67E-45     |
| EGFR                          | -0.22             | 4.99E-37     |
| AKTPT308                      | 0.39              | 1.38E-34     |
| MAPKPT202Y204                 | 0.40              | 1.44E-33     |
| ETS1                          | -0.25             | 8.64E-32     |
| YB1                           | -0.18             | 8.09E-30     |
| P90RSKPT359S363               | 0.15              | 8.73E-30     |
| VHL                           | 0.57              | 2.42E-27     |
| PDCD4                         | 0.29              | 4.59E-25     |
| TAZ                           | -0.12             | 2.03E-24     |
| MTORPS2448                    | 0.09              | 4.20E-24     |
| MEK1PS217S221                 | 0.18              | 2.38E-23     |
| BADPS112                      | 0.12              | 5.86E-23     |
| S6PS235S236                   | 0.26              | 1.25E-22     |
| P38PT180Y182                  | 0.23              | 1.33E-22     |

| Discriminators for cluster_V |                   |              |
|------------------------------|-------------------|--------------|
| Protein                      | Fold change (Log) | adj. P-value |
| MYH11                        | 1.97              | 2.84E-211    |
| RICTOR                       | 0.94              | 1.27E-139    |
| CAVEOLIN1                    | 1.02              | 8.18E-122    |
| HER2                         | -0.62             | 4.63E-117    |
| HER2PY1248                   | -0.52             | 3.29E-112    |
| COLLAGENVI                   | 0.55              | 2.41E-108    |
| EGFRPY1068                   | -0.88             | 2.62E-98     |
| RBM15                        | -0.49             | 1.41E-86     |
| EEF2                         | -0.46             | 4.47E-67     |
| CYCLINB1                     | -0.60             | 2.74E-64     |
| S6                           | -0.37             | 6.82E-56     |
| EGFRPY1173                   | -0.36             | 9.39E-54     |
| GAPDH                        | -0.78             | 1.79E-48     |
| STAT3PY705                   | 0.25              | 2.77E-46     |
| CHK2                         | -0.24             | 5.41E-41     |
| FOXM1                        | -0.25             | 6.08E-41     |
| PEA15PS116                   | -0.42             | 7.89E-40     |
| PKCALPHAPS657                | 0.27              | 9.00E-38     |
| ECADHERIN                    | -0.51             | 1.77E-36     |
| P70S6K                       | -0.22             | 1.16E-35     |
| RAB11                        | 0.20              | 1.35E-35     |
| EGFR                         | -0.22             | 4.20E-34     |
| MAPKPT202Y204                | 0.42              | 2.68E-32     |
| HSP70                        | 0.41              | 9.01E-32     |
| ASNS                         | -0.31             | 1.40E-31     |

| Discriminators for cluster_VI |                   |              |
|-------------------------------|-------------------|--------------|
| Protein                       | Fold change (Log) | adj. P-value |
| CHK1                          | 0.38              | 9.64E-154    |
| EIF4G                         | -0.60             | 1.65E-142    |
| HER2                          | -0.78             | 3.54E-129    |
| AKT                           | -0.53             | 5.12E-120    |
| BETACATENIN                   | -0.89             | 3.99E-112    |
| EGFRPY1068                    | -1.05             | 1.82E-97     |
| TUBERIN                       | -0.45             | 4.80E-97     |
| X53BP1                        | -0.55             | 7.17E-86     |
| TSC1                          | -0.40             | 9.64E-83     |
| RBM15                         | -0.56             | 1.08E-77     |
| BRAF                          | -0.55             | 1.08E-77     |
| STAT5ALPHA                    | -0.61             | 1.51E-77     |
| MTOR                          | -0.29             | 7.63E-74     |
| HER2PY1248                    | -0.49             | 3.42E-71     |
| KU80                          | -0.38             | 3.77E-71     |
| STATHMIN                      | 0.24              | 3.78E-71     |
| BAP1C4                        | -0.33             | 3.99E-71     |
| MRE11                         | 0.18              | 8.37E-67     |
| CMETPY1235                    | 0.17              | 1.21E-66     |
| X1433EPSILON                  | 0.17              | 1.27E-63     |
| PAI1                          | 0.71              | 6.86E-63     |
| P70S6K                        | -0.34             | 1.82E-60     |
| TAZ                           | 0.25              | 2.93E-60     |
| AMPKPT172                     | -0.52             | 3.29E-60     |
| ERK2                          | -0.43             | 5.54E-59     |

| Discriminators for cluster_VII |                   |              |
|--------------------------------|-------------------|--------------|
| Protein                        | Fold change (Log) | adj. P-value |
| HER2PY1248                     | -0.69             | 2.12E-182    |
| EGFRPY1068                     | -1.23             | 1.23E-175    |
| EGFRPY1173                     | -0.52             | 4.69E-101    |
| HER2                           | -0.54             | 1.41E-86     |
| SRCPY527                       | -0.55             | 9.35E-76     |
| P38PT180Y182                   | -0.43             | 1.74E-62     |
| GSK3PS9                        | -0.46             | 2.12E-61     |
| GSK3ALPHABETAPS21S9            | -0.45             | 2.86E-57     |
| SRCPY416                       | -0.38             | 9.66E-56     |
| MAPKPT202Y204                  | -0.56             | 4.20E-54     |
| RBPS807S811                    | -0.35             | 2.14E-40     |
| PEA15PS116                     | -0.41             | 3.66E-37     |
| EGFR                           | -0.23             | 3.74E-36     |
| NDRG1PT346                     | -0.49             | 4.85E-33     |
| AKTPS473                       | -0.43             | 1.75E-32     |
| BADPS112                       | -0.16             | 3.88E-32     |
| X4EBP1PT37T46                  | -0.32             | 3.98E-31     |
| NFKBP65PS536                   | -0.37             | 3.30E-29     |
| BIM                            | 0.24              | 3.17E-28     |
| PRAS40PT246                    | -0.17             | 3.95E-28     |
| SHCPY317                       | -0.17             | 8.23E-26     |
| MEK1PS217S221                  | -0.21             | 8.23E-26     |
| PI3KP85                        | 0.15              | 2.80E-24     |
| GATA3                          | 0.24              | 7.58E-22     |
| RAPTOR                         | 0.15              | 7.67E-22     |

Top 25 protein discriminators (according to adjusted *P*-value (Benjamini Hochberg)) of each MC clusters are listed. Positive values (highlighted in red) in Fold change (Log) column indicate a fold change increase, in log scale, of the protein level of particular protein comparing to that in all other clusters by LIMMA analysis, while negative values indicate fold change decrease. Full list is available at <http://bioinformatics.mdanderson.org/main/TCGA/Pancan11/RPPA>.

**Supplementary Table 10: Top 25 RNA discriminators for MC clusters**

| MC clusters |          |          |          |          |          |          |          |
|-------------|----------|----------|----------|----------|----------|----------|----------|
| I           | Ila      | Ilb      | III      | IV       | V        | VI       | VII      |
| CLCA1       | ERBB2    | SEC61G   | STAR3D3  | STAR3D3  | MYH11    | PGAP3    | PGAP3    |
| REG4        | STAR3D3  | LANCL2   | C13orf18 | C17orf37 | SYNPO2   | SOCS3    | ZG16     |
| ZG16        | PGAP3    | PMP2     | VOPP1    | PSMD3    | C17orf37 | SERPINB4 | ERBB2    |
| GPA33       | C17orf37 | KRT18    | FEZ1     | GBAS     | SLIT3    | IMPA2    | CLCA1    |
| NOX1        | ORMDL3   | KRT8     | SLC38A5  | CHCHD2   | CNN1     | CYP24A1  | REG4     |
| CDX1        | PSMD3    | ARHGEF5  | GAP43    | PGAP3    | COL14A1  | RAB38    | STAR3D3  |
| PHGR1       | MED1     | OLIG2    | SEC61G   | PPP2R3A  | LMOD1    | SERPINB3 | KRT20    |
| MEP1A       | CDK12    | GRB7     | NT5E     | C1orf186 | AOC3     | ORMDL3   | FABP1    |
| FABP1       | MSL1     | HEPACAM  | PSMD3    | ERBB2    | PSMD3    | FOSL2    | NOS2     |
| CDX2        | GRB7     | DSG2     | TNC      | RIPK4    | ACTA2    | AHNAK2   | ESR1     |
| CDH17       | PNMT     | C1orf61  | DSE      | ORMDL3   | MYLK     | GNA15    | LANCL2   |
| SPINK4      | CASC3    | GFAP     | F3       | WDR91    | IGF1     | RIPK4    | PSMD3    |
| REG3A       | MED24    | NCAN     | GNA12    | STAT6    | TAGLN    | DUSP7    | MEP1A    |
| SLC26A3     | ABCC11   | HOOK1    | HEPH     | SLC26A9  | PPP1R12B | LTBR     | SLC26A3  |
| KRT20       | MUCL1    | PRSS8    | S100B    | MPZL2    | HSPG2    | CTSC     | FAM3D    |
| MUC17       | SEC16A   | SPINT1   | PLA2G2A  | LANCL2   | SEC61G   | SPRR2D   | CEACAM7  |
| LGALS4      | ZNF652   | SPINT2   | ACTB     | FAIM2    | CPXM2    | RHBDF2   | NOX1     |
| ITLN1       | CYB561   | AP1M2    | HGSNAT   | KIAA1217 | ADH1B    | A4GALT   | C17orf37 |
| DEFA6       | WIPF2    | GBAS     | EMILIN1  | HOOK1    | PGR      | TYMP     | SPINK4   |
| RIMKLB      | SCGB2A2  | FEZ1     | PMEP1A   | IL1R1    | GPR124   | CXCL5    | REG3A    |
| MUC2        | SERHL2   | KIAA1217 | CD99     | CCT6A    | TNXXB    | CXCL1    | C12orf35 |
| EPS8L3      | CLTC     | GAP43    | PDGFRA   | CASC3    | IL1R1    | GBAS     | PHGR1    |
| C2orf89     | CREB3L4  | TMEM184A | PARD6B   | DCTPP1   | GJA5     | S100A8   | LGALS4   |
| MUC12       | MIA3     | CLDN4    | CALM1    | LFNG     | COL15A1  | SPRR1B   | IGF1     |
| RPS3A       | NUFIP2   | ELF3     | ZBTB44   | ALPL     | HMCN1    | EHBP1L1  | CCL5     |

Top 25 RNA discriminators (according to adjusted *P*-value (Benjamini Hochberg)) of each MC clusters are listed. Discriminators with positive fold change are highlighted in red, while discriminators with negative fold change are highlighted in green. Full list is available at <http://bioinformatics.mdanderson.org/main/TCGA/Pancan11/RPPA>.



**Supplementary Table 11: Top 25 miRNA discriminators for MC clusters**

| MC clusters  |               |              |              |               |               |              |              |
|--------------|---------------|--------------|--------------|---------------|---------------|--------------|--------------|
| I            | Ila           | Ilb          | III          | IV            | V             | VI           | VII          |
| hsa.mir.552  | hsa.mir.3150b | hsa.mir.944  | hsa.mir.379  | hsa.mir.369   | hsa.mir.145   | hsa.mir.223  | hsa.mir.584  |
| hsa.mir.192  | hsa.mir.184   | hsa.mir.3917 | hsa.mir.369  | hsa.mir.889   | hsa.mir.130b  | hsa.mir.190b | hsa.mir.342  |
| hsa.mir.215  | hsa.mir.3677  | hsa.mir.2355 | hsa.mir.381  | hsa.mir.552   | hsa.mir.133a  | hsa.mir.486  | hsa.mir.552  |
| hsa.mir.194  | hsa.mir.4326  | hsa.mir.3648 | hsa.mir.223  | hsa.mir.885   | hsa.mir.17    | hsa.mir.144  | hsa.mir.192  |
| hsa.mir.2355 | hsa.mir.3127  | hsa.mir.3199 | hsa.mir.134  | hsa.mir.411   | hsa.mir.99a   | hsa.mir.31   | hsa.mir.1301 |
| hsa.mir.3613 | hsa.mir.190b  | hsa.mir.205  | hsa.mir.889  | hsa.mir.379   | hsa.mir.33b   | hsa.mir.29a  | hsa.mir.203  |
| hsa.mir.577  | hsa.mir.577   | hsa.mir.2115 | hsa.mir.337  | hsa.mir.382   | hsa.mir.210   | hsa.mir.212  | hsa.mir.215  |
| hsa.mir.3065 | hsa.mir.135b  | hsa.mir.421  | hsa.mir.199a | hsa.mir.134   | hsa.mir.148b  | hsa.mir.140  | hsa.mir.194  |
| hsa.mir.3607 | hsa.mir.223   | hsa.mir.451  | hsa.mir.382  | hsa.mir.381   | hsa.mir.33a   | hsa.mir.184  | hsa.mir.320a |
| hsa.mir.3647 | hsa.mir.486   | hsa.mir.185  | hsa.mir.199b | hsa.mir.500b  | hsa.mir.629   | hsa.mir.451  | hsa.mir.429  |
| hsa.mir.95   | hsa.mir.193a  | hsa.mir.3613 | hsa.mir.758  | hsa.mir.500a  | hsa.let.7c    | hsa.mir.24   | hsa.mir.125b |
| hsa.let.7e   | hsa.mir.191   | hsa.mir.3615 | hsa.mir.654  | hsa.mir.3150b | hsa.mir.140   | hsa.mir.221  | hsa.mir.760  |
| hsa.mir.3127 | hsa.mir.27b   | hsa.mir.3687 | hsa.mir.411  | hsa.mir.539   | hsa.mir.139   | hsa.mir.99a  | hsa.mir.200a |
| hsa.mir.147b | hsa.mir.2115  | hsa.mir.144  | hsa.mir.495  | hsa.mir.494   | hsa.mir.7     | hsa.mir.504  | hsa.mir.125a |
| hsa.mir.3677 | hsa.mir.615   | hsa.mir.223  | hsa.mir.409  | hsa.mir.34b   | hsa.mir.3934  | hsa.mir.3127 | hsa.mir.361  |
| hsa.mir.365  | hsa.mir.642a  | hsa.mir.541  | hsa.mir.30c  | hsa.mir.655   | hsa.mir.125b  | hsa.mir.27a  | hsa.mir.99b  |
| hsa.mir.205  | hsa.mir.323b  | hsa.mir.3676 | hsa.mir.493  | hsa.mir.378c  | hsa.mir.1     | hsa.mir.376b | hsa.mir.452  |
| hsa.mir.181b | hsa.mir.144   | hsa.mir.340  | hsa.mir.664  | hsa.mir.320a  | hsa.mir.93    | hsa.mir.182  | hsa.mir.484  |
| hsa.mir.3653 | hsa.mir.199a  | hsa.mir.3065 | hsa.mir.143  | hsa.mir.135a  | hsa.mir.18a   | hsa.mir.132  | hsa.mir.19a  |
| hsa.mir.1301 | hsa.mir.1287  | hsa.mir.130b | hsa.mir.496  | hsa.mir.493   | hsa.mir.3150b | hsa.mir.375  | hsa.mir.193a |
| hsa.let.7c   | hsa.mir.425   | hsa.mir.24   | hsa.mir.127  | hsa.mir.664   | hsa.mir.942   | hsa.mir.1246 | hsa.let.7a   |
| hsa.mir.584  | hsa.mir.149   | hsa.mir.18b  | hsa.mir.136  | hsa.mir.376c  | hsa.mir.100   | hsa.mir.196a | hsa.mir.92b  |
| hsa.mir.3130 | hsa.mir.199b  | hsa.mir.550a | hsa.mir.30d  | hsa.mir.758   | hsa.mir.3648  | hsa.mir.1287 | hsa.mir.223  |
| hsa.mir.99a  | hsa.mir.20b   | hsa.mir.145  | hsa.mir.299  | hsa.mir.125a  | hsa.mir.345   | hsa.mir.584  | hsa.let.7e   |
| hsa.mir.378c | hsa.mir.365   | hsa.mir.3158 | hsa.mir.152  | hsa.mir.215   | hsa.mir.497   | hsa.mir.191  | hsa.mir.33a  |

Top 25 miRNA discriminators (according to adjusted *P*-value (Benjamini Hochberg)) of each RBN clusters are listed. Discriminators with positive fold change are highlighted in red, while discriminators with negative fold change are highlighted in green. Full list is available at <http://bioinformatics.mdanderson.org/main/TCGA/Pancan11/RPPA>.

**Supplementary Table 12: Top 25 Mutation discriminators for MC clusters**

| MC clusters |          |          |          |         |             |          |         |
|-------------|----------|----------|----------|---------|-------------|----------|---------|
| I           | Ila      | Iib      | III      | IV      | V           | VI       | VII     |
| APC         | PTEN     | EGFR     | PTEN     | PTEN    | NALCN       | DNMT3A   | GATA3   |
| KRAS        | VHL      | VHL      | OR56A1   | TRIM23  | ERBB4       | HACE1    | SLC9A2  |
| TCF7L2      | TP53     | ARID1A   | DOCK5    | ARID1A  | PCDH11X     | LRP1B    | DCAF8L1 |
| EDNRB       | APC      | PBRM1    | PRF1     | ZNF429  | ROBO4       | EP300    | MAGEB6  |
| HYDIN       | ZNF384   | HMCN1    | MAP2     | FAM135B | PREX2       | CDH8     | MET     |
| KIRREL3     | KRAS     | KRAS     | ZNF835   | CDH4    | FAT3        | KIAA1429 | KRAS    |
| EVC         | DST      | PIK3CA   | EGFR     | TRPM6   | BRCA2       | IQGAP1   | DNAJC6  |
| RUVBL1      | NAV3     | WNT2     | NLRP4    | DOPEY2  | SEMA5B      | TPO      | HNRNPU  |
| REV3L       | DNAH9    | OR9G1    | ATXN2    | TTC3    | USP6        | ADAMTSL3 | EML4    |
| MARCH10     | ANK2     | PCSK6    | OR1C1    | CHST9   | CHRM3       | MST1P9   | APC     |
| FBXW7       | RYR1     | CDKN2A   | KHDRBS2  | DOCK5   | VCAN        | MAP3K1   | SLC4A3  |
| IQCB1       | MAP3K10  | OBSCN    | GALNT14  | PVRL4   | TRPA1       | TRHR     | ZNF425  |
| TBC1D22A    | CUBN     | SLCO6A1  | TGFBR2   | TNRC6A  | FAM171B     | ATP10A   | ARMC5   |
| GPC6        | LRP1B    | SERPINI1 | TRIM71   | ZFAT    | LPPR4       | APPBP2   | ZNF282  |
| TGFBR2      | EPB41    | CUBN     | FASN     | MAN2C1  | PCDHGA6     | CNST     | POLK    |
| ROBO1       | CSMD2    | MYSM1    | PPP1R13B | EIF2C3  | ZDBF2       | AHI1     | THSD1   |
| KRIT1       | ARHGFE25 | RBBP8    | NLRP13   | COL27A1 | C10orf90    | ANKIB1   | SLC6A14 |
| BCR         | RUNX1    | HCK      | TOP3A    | ZFYVE1  | PRDM14      | IL1RAPL1 | BRD8    |
| THBS1       | NF1      | LGSN     | WDR78    | SCN8A   | KCND3       | ZCCHC6   | C3orf30 |
| EVC2        | ZC3H7A   | SCNN1G   | ZNF546   | CMYA5   | ASPM        | PCDH11X  | SLITRK4 |
| ISL1        | FRAS1    | MDN1     | PPARGC1B | SIPA1L2 | FPGT.TNNI3K | OR4A5    | RGPD3   |
| AIM2        | DNAH10   | SETD2    | SLC6A4   | UGT2A1  | SLC17A8     | CSMD3    | ZNF257  |
| CAP2        | HERC2    | DNAH10   | ZNF235   | TTC16   | TPO         | ALMS1    | WDR70   |
| FAM22F      | TRRAP    | KIAA1109 | PITPNM1  | ARMC9   | SGIP1       | HINFP    | TMC7    |
| VHL         | RIMS2    | CACNA1E  | CWH43    | ZNF749  | ZIM3        | NOTCH1   | ITGA7   |

Top 25 mutation discriminators (according to information gain) of each RBN clusters are listed. Mutations enriched in cluster are highlighted in red, while mutations depleted in cluster are highlighted in green. Full list is available at <http://bioinformatics.mdanderson.org/main/TCGA/Pancan11/RPPA>.

**Supplementary Table 13: Pathway score members**

| <b>Apoptosis score<sup>4</sup></b>            | <b>Direction</b> | <b>EMT score<sup>5,6</sup></b>              | <b>Direction</b> | <b>Ras/MAPK score<sup>7,8,9,10,11</sup></b> | <b>Direction</b> |
|-----------------------------------------------|------------------|---------------------------------------------|------------------|---------------------------------------------|------------------|
| BAK                                           | +                | FIBRONECTIN                                 | +                | ARAFPS299                                   | +                |
| BAX                                           | +                | NCADHERIN                                   | +                | CJUNPS73                                    | +                |
| BID                                           | +                | COLLAGENVI                                  | +                | CRAFPS338                                   | +                |
| BIM                                           | +                | CLAUDIN7                                    | -                | JNKPT183Y185                                | +                |
| CASPASE7CLEAVEDD198                           | +                | ECADHERIN                                   | -                | MAPKPT202Y204                               | +                |
| BADPS112                                      | -                |                                             |                  | MEK1PS217S221                               | +                |
| BCL2                                          | -                | <b>Hormone_a score<sup>12</sup></b>         | <b>Direction</b> | P38PT180Y182                                | +                |
| BCLXL                                         | -                | ERALPHA                                     | +                | P90RSKPT359S363                             | +                |
| CIAP                                          | -                | ERALPHAPS118                                | +                | SHCPY317                                    | +                |
|                                               |                  | PR                                          | +                | YB1PS102                                    | +                |
| <b>Cell cycle score<sup>13</sup></b>          | <b>Direction</b> |                                             |                  |                                             |                  |
| CDK1                                          | +                | <b>Hormone_b score<sup>14,15,16</sup></b>   | <b>Direction</b> | <b>RTK score<sup>17,18</sup></b>            | <b>Direction</b> |
| CYCLINB1                                      | +                | AR                                          | +                | EGFRPY1068                                  | +                |
| CYCLIND1                                      | +                | INPP4B                                      | +                | EGFRPY1173                                  | +                |
| CYCLINE1                                      | +                | GATA3                                       | +                | HER2PY1248                                  | +                |
| CYCLINE2                                      | +                | BCL2                                        | +                | HER3PY1298                                  | +                |
| P27PT157                                      | +                |                                             |                  | SHCPY317                                    | +                |
| P27PT198                                      | +                | <b>PI3K/Akt score<sup>19,20,21,22</sup></b> | <b>Direction</b> | SRCPY416                                    | +                |
| PCNA                                          | +                | AKTPS473                                    | +                | SRCPY527                                    | +                |
|                                               |                  | AKTPT308                                    | +                |                                             |                  |
| <b>DNA damage response score<sup>23</sup></b> | <b>Direction</b> | <b>GSK3ALPHABETAPS21S9</b>                  | <b>+</b>         | <b>TSC/mTOR score<sup>19,22,24</sup></b>    | <b>Direction</b> |
| 53BP1                                         | +                | GSK3PS9                                     | +                | 4EBP1PS65                                   | +                |
| ATM                                           | +                | P27PT157                                    | +                | 4EBP1PT37T46                                | +                |
| BRCA2                                         | +                | P27PT198                                    | +                | 4EBP1PT70                                   | +                |
| CHK1PS345                                     | +                | PRAS40PT246                                 | +                | P70S6KPT389                                 | +                |
| CHK2PT68                                      | +                | TUBERINPT1462                               | +                | MTORPS2448                                  | +                |
| KU80                                          | +                | INPP4B                                      | -                | S6PS235S236                                 | +                |
| MRE11                                         | +                | PTEN                                        | -                | S6PS240S244                                 | +                |
| P53                                           | +                |                                             |                  | RICTORPT1135                                | +                |
| RAD50                                         | +                |                                             |                  |                                             |                  |
| RAD51                                         | +                |                                             |                  |                                             |                  |
| XRCC1                                         | +                |                                             |                  |                                             |                  |

**Supplementary Table 14: Outcome prediction by pathways and actionable proteins**

| Tumor | Predictor           | Training set |              |         | Test set                        |              |         |                            |              |         |        |
|-------|---------------------|--------------|--------------|---------|---------------------------------|--------------|---------|----------------------------|--------------|---------|--------|
|       |                     | n            | Hazard ratio | P-value | Optimized percentage as cut-off |              |         | Optimized value as cut-off |              |         |        |
|       |                     |              |              |         | High/Low                        | Hazard ratio | P-value | High/Low                   | Hazard ratio | P-value |        |
| BRCA  | BCL2                | 338/139      | 0.38         | 0.0005  |                                 |              |         |                            |              |         |        |
| BRCA  | BRAF                | 350/127      | 2.31         | 0.0250  | 174/63                          | 3.60         | 0.0390  | 162/75                     | 0.40         |         | 0.0250 |
| BRCA  | SRCPY416            | 130/347      | 2.22         | 0.0070  | 65/172                          | 2.54         | 0.0230  | 71/166                     | 2.86         |         | 0.0100 |
| COAD  | FASN                | 58/163       | 0.37         | 0.0420  | 29/81                           | 0.19         | 0.0160  | 40/70                      | 0.11         |         | 0.0070 |
| HNSC  | PTEN                | 62/80        | 0.60         | 0.0400  | 31/39                           | 0.43         | 0.0270  |                            |              |         |        |
| HNSC  | SRCPY416            | 101/41       | 0.54         | 0.0180  | 50/20                           | 0.25         | 0.0001  | 55/15                      | 0.32         |         | 0.0021 |
| KIRC  | ACC1                | 64/239       | 3.27         | 0.0000  | 32/119                          | 2.29         | 0.0140  | 29/122                     | 2.46         |         | 0.0100 |
| KIRC  | AR                  | 203/100      | 0.39         | 0.0000  | 102/49                          | 0.33         | 0.0001  | 97/54                      | 0.32         |         | 0.0001 |
| KIRC  | HER2                | 242/61       | 0.51         | 0.0016  | 121/30                          | 0.38         | 0.0016  | 123/28                     | 0.40         |         | 0.0033 |
| KIRC  | HER3                | 216/87       | 0.32         | 0.0000  | 108/43                          | 0.52         | 0.0330  | 108/43                     | 0.52         |         | 0.0330 |
| KIRC  | HER3PY1298          | 150/153      | 0.43         | 0.0001  | 75/75                           | 0.56         | 0.0470  | 81/70                      | 0.44         |         | 0.0049 |
| KIRC  | Hormone_b           | 236/67       | 0.51         | 0.0019  | 118/33                          | 0.41         | 0.0045  | 116/35                     | 0.44         |         | 0.0079 |
| KIRC  | PI3K/Akt            | 185/118      | 0.67         | 0.0430  | 93/58                           | 0.53         | 0.0260  | 95/56                      | 0.52         |         | 0.0220 |
| KIRC  | RTK                 | 242/61       | 0.29         | 0.0000  | 121/30                          | 0.53         | 0.0470  | 133/18                     | 0.32         |         | 0.0019 |
| KIRC  | SRCPY416            | 237/66       | 0.36         | 0.0000  |                                 |              |         | 136/15                     | 0.38         |         | 0.0072 |
| KIRC  | TFRC                | 117/186      | 2.62         | 0.0000  | 59/92                           | 1.85         | 0.0310  | 58/93                      | 1.87         |         | 0.0280 |
| LUAD  | TFRC                | 96/44        | 2.75         | 0.0110  | 49/22                           | 3.60         | 0.0440  | 50/21                      | 3.60         |         | 0.0440 |
| LUSC  | TFRC                | 75/47        | 0.44         | 0.0066  | 37/23                           | 0.37         | 0.0150  | 30/30                      | 0.44         |         | 0.0490 |
| OVCA  | AR                  | 212/57       | 0.64         | 0.0230  |                                 |              |         | 114/19                     | 0.49         |         | 0.0260 |
| OVCA  | DNA Damage Response | 167/102      | 0.69         | 0.0300  | 83/50                           | 0.57         | 0.0250  |                            |              |         |        |
| OVCA  | EGFRPY1173          | 108/161      | 0.59         | 0.0029  | 54/79                           | 0.58         | 0.0340  | 66/67                      | 0.56         |         | 0.0150 |

| Tumor | Predictor           | Test set          |              |         |                        |              |         |                         |              |         |
|-------|---------------------|-------------------|--------------|---------|------------------------|--------------|---------|-------------------------|--------------|---------|
|       |                     | Median as cut-off |              |         | Top vs. bottom tertile |              |         | Top vs. bottom quartile |              |         |
|       |                     | n                 | Hazard ratio | P-value | n                      | Hazard ratio | P-value | n                       | Hazard ratio | P-value |
| BRCA  | BCL2                | 118/119           | 0.47         | 0.0780  | 79/79                  | 0.45         | 0.1000  | 59/60                   | 0.47         | 0.1700  |
| BRCA  | BRAF                | 118/119           | 1.01         | 0.9800  | 79/79                  | 1.46         | 0.4900  | 59/60                   | 2.87         | 0.1200  |
| BRCA  | SRCPY416            | 118/119           | 1.68         | 0.2100  | 79/79                  | 2.00         | 0.1200  | 59/60                   | 1.56         | 0.4400  |
| COAD  | FASN                | 55/55             | 0.14         | 0.0050  | 37/37                  | 0.17         | 0.0510  | 28/28                   | 0.11         | 0.0550  |
| HNSC  | PTEN                | 35/35             | 0.60         | 0.1500  | 23/23                  | 0.61         | 0.2600  | 18/18                   | 0.75         | 0.5500  |
| HNSC  | SRCPY416            | 35/35             | 0.51         | 0.0660  | 23/23                  | 0.29         | 0.0096  | 18/18                   | 0.25         | 0.0140  |
| KIRC  | ACC1                | 75/76             | 1.87         | 0.0340  | 50/50                  | 1.92         | 0.0990  | 38/38                   | 4.08         | 0.0130  |
| KIRC  | AR                  | 75/76             | 0.34         | 0.0005  | 50/50                  | 0.29         | 0.0011  | 38/38                   | 0.20         | 0.0003  |
| KIRC  | HER2                | 75/76             | 0.62         | 0.1000  | 50/50                  | 0.30         | 0.0042  | 38/38                   | 0.27         | 0.0025  |
| KIRC  | HER3                | 75/76             | 0.50         | 0.0200  | 50/50                  | 0.37         | 0.0054  | 38/38                   | 0.45         | 0.0540  |
| KIRC  | HER3PY1298          | 75/76             | 0.56         | 0.0470  | 50/50                  | 0.47         | 0.0300  | 38/38                   | 0.57         | 0.1500  |
| KIRC  | Hormone_b           | 75/76             | 0.53         | 0.0390  | 50/50                  | 0.41         | 0.0310  | 38/38                   | 0.34         | 0.0160  |
| KIRC  | PI3K/Akt            | 75/76             | 0.65         | 0.1300  | 50/50                  | 0.44         | 0.0260  | 38/38                   | 0.50         | 0.1100  |
| KIRC  | RTK                 | 75/76             | 0.35         | 0.0007  | 50/50                  | 0.25         | 0.0012  | 38/38                   | 0.29         | 0.0096  |
| KIRC  | SRCPY416            | 75/76             | 0.68         | 0.1900  | 50/50                  | 0.75         | 0.4000  | 38/38                   | 0.61         | 0.2000  |
| KIRC  | TFRC                | 75/76             | 1.78         | 0.0490  | 50/50                  | 1.46         | 0.2500  | 38/38                   | 1.41         | 0.3300  |
| LUAD  | TFRC                | 35/36             | 2.28         | 0.0840  | 24/24                  | 2.35         | 0.1400  | 18/18                   | 2.28         | 0.2400  |
| LUSC  | TFRC                | 30/30             | 0.44         | 0.0490  | 20/20                  | 0.32         | 0.0240  | 15/15                   | 0.54         | 0.2800  |
| OVCA  | AR                  | 66/67             | 0.70         | 0.1500  | 44/44                  | 0.68         | 0.2100  | 33/34                   | 0.55         | 0.0940  |
| OVCA  | DNA Damage Response | 66/67             | 0.77         | 0.2800  | 44/44                  | 0.76         | 0.3600  | 33/34                   | 0.91         | 0.8000  |
| OVCA  | EGFRPY1173          | 66/67             | 0.56         | 0.0150  | 44/44                  | 0.53         | 0.0320  | 33/34                   | 0.58         | 0.1100  |

Upper table shows the outcome prediction results in 11 individual diseases by pathways (listed in Supplementary Table 13) and actionable proteins (shown in Fig. 5) using a training-and-test-set approach finding the optimized cutoff. Only the pathways and actionable proteins confirmed in test set are shown. Bottom table shows the results using median as cutoff, top vs. bottom tertile and top vs. bottom quartile in the same test sets. Hazard ratios >1.00 (highlighted in red) indicate higher pathway score or protein expression predicting poor overall survival, while hazard ratios <1.00 (highlighted in green) indicate higher score or expression predicting better survival. Significant P-values (<0.05) are in red. The smallest P-value for each pathway or actionable protein is highlighted in yellow.

**Supplementary Table 15: Literature reference and independent validation of top 25 links shown in Supplementary Figure 13**

| Rank | Protein-protein link        | Literature | Validated in Independent BRCA, OVCA and UCEC sets (0.25 as cutoff) |
|------|-----------------------------|------------|--------------------------------------------------------------------|
| 1    | GAB2-MIG6                   |            | N/A                                                                |
| 2    | HER2-HER2PY1248             |            | BRCA, UCEC                                                         |
| 3    | BETACATENIN-ECADHERIN       | 25         | BRCA                                                               |
| 4    | PTEN-PI3KP85                | 26         | N/A                                                                |
| 5    | EGFRPY1068-HER2PY1248       | 27         | OVCA-1                                                             |
| 6    | MAPKPT202Y204-MEK1PS217S221 | 28         | OVCA-1, UCEC                                                       |
| 7    | MYH11-RICTOR                |            | BRCA                                                               |
| 8    | CIAP-YAPPS127               | 29, 30     | N/A                                                                |
| 9    | EGFRPY1068-EGFRPY1173       |            | N/A                                                                |
| 10   | AKTPT308-CDK1               | 31         | N/A                                                                |
| 11   | EGFRPY1068-EGFR             |            | N/A                                                                |
| 12   | CDK1-CYCLINB1               | 32         | OVCA-1                                                             |
| 13   | PKCDELTA664-PKCPANBETAII660 | 32, 33, 34 |                                                                    |
| 14   | EGFRPY1173-HER2PY1248       |            | N/A                                                                |
| 15   | PEA15PS116-ETS1             |            | N/A                                                                |
| 16   | RAD50-MYH11                 |            | N/A                                                                |
| 17   | P90RSKPT359S363-YB1PS102    | 10         |                                                                    |
| 18   | CYCLINB1-FOX1               | 35         | BRCA, UCEC                                                         |
| 19   | EIF4E-MEK1                  | 36         | UCEC                                                               |
| 20   | HER3-XBP1                   |            |                                                                    |
| 21   | EGFRPY1068-SHCPY317         | 37         |                                                                    |
| 22   | PKCALPHAPS657-PKCDELTA664   | 38         |                                                                    |
| 23   | CHK2PT68-PI3KP110ALPHA      | 39         | N/A                                                                |
| 24   | BECLIN-XBP1                 | 40         | OVCA-2                                                             |
| 25   | BECLIN-TAZ                  |            | N/A                                                                |

Four independent datasets were used for the validation of the protein links; 2 ovarian cancer sets (OVCA-1; Japanese set and OVCA-2; Philadelphia set<sup>41</sup>), a breast cancer set<sup>42</sup> and an endometrial cancer set<sup>43</sup>. Additionally a Pubmed search was performed to confirm links. In cases where strong correlation for a link was only found in tumor lineages for which no external dataset could be retrieved, this has been indicated with N/A (not available). 10 of the 25 links were validated using literature search, and 9 out of 14 links (without NA's) were validated in the independent datasets. Overall, 17 out of 25 links were validated using either approach.



**Supplementary Table 16: Key clinical variables in pan-cancer dataset**

| Clinical variable                 | Number of cases (n (%)) |                        |                       |                  |                       |                   |                       |                       |                        |                       |                      |
|-----------------------------------|-------------------------|------------------------|-----------------------|------------------|-----------------------|-------------------|-----------------------|-----------------------|------------------------|-----------------------|----------------------|
|                                   | BLCA <sup>1</sup>       | BRCA <sup>2</sup>      | COAD <sup>3</sup>     | GBM <sup>4</sup> | HNSC <sup>5</sup>     | KIRC <sup>6</sup> | LUAD <sup>7</sup>     | LUSC <sup>8</sup>     | OVCA <sup>9</sup>      | READ <sup>10</sup>    | UCEC <sup>11</sup>   |
| <b>Tumor lineage</b>              |                         |                        |                       |                  |                       |                   |                       |                       |                        |                       |                      |
| <b>Age (median)</b>               | 68 <sup>12</sup>        | 58                     | 69                    | 60               | 62                    | 61                | 66                    | 69                    | 58                     | 66                    | 64                   |
| <b>Stage</b>                      |                         |                        |                       |                  |                       |                   |                       |                       |                        |                       |                      |
| 1                                 | 1 (1) <sup>15</sup>     | 112 (15) <sup>19</sup> | 50 (16)               |                  | 9 (5) <sup>20</sup>   | 219 (48)          | 125 (53)              | 98 (51) <sup>14</sup> | 14 (3) <sup>15</sup>   | 21 (17) <sup>16</sup> | 230 (62)             |
| 2                                 | 35 (29)                 | 423 (59)               | 135 (44)              |                  | 39 (20)               | 44 (10)           | 50 (21)               | 57 (30)               | 20 (5)                 | 40 (32)               | 32 (9)               |
| 3                                 | 40 (34)                 | 173 (24)               | 79 (26)               | NA               | 31 (16)               | 115 (25)          | 49 (21)               | 37(19)                | 320 (79)               | 43 (35)               | 88 (24)              |
| 4                                 | 43 (36)                 | 15 (2)                 | 42 (14)               |                  | 121 (61)              | 76 (17)           | 13 (5)                | 0 (0)                 | 51 (13)                | 20 (15)               | 21 (6)               |
| <b>Adjuvant treatment</b>         |                         |                        |                       |                  |                       |                   |                       |                       |                        |                       |                      |
| Chemo- /Hormonal                  | 2 (2)                   | 272 (37)               | 48 (15)               | 122 (58)         | 35 (17)               | 4 (1)             | 30 (13)               | 22 (11)               | 238 (58)               | 16 (12)               | 82 (22)              |
| Radio-                            | 0(0)                    | 183 (25)               | 3 (1)                 | 144 (68)         | 55 (26)               | 0 (0)             | 12 (5)                | 9 (5)                 | 2 (0)                  | 5 (4)                 | 119 (32)             |
| <b>Smoking status</b>             |                         |                        |                       |                  |                       |                   |                       |                       |                        |                       |                      |
| Current                           | 23 (20) <sup>16</sup>   |                        |                       |                  | 67 (33) <sup>17</sup> |                   | 52 (23) <sup>18</sup> | 39 (21) <sup>16</sup> |                        |                       |                      |
| Reformed                          | 66 (56)                 | NA                     | NA                    | NA               | 100 (49)              | NA                | 144 (63)              | 142 (75)              | NA                     | NA                    | NA                   |
| Never                             | 28 (24)                 |                        |                       |                  | 37 (18)               |                   | 32 (14)               | 8 (4)                 |                        |                       |                      |
| <b>Death events</b>               | 34 (28) <sup>13</sup>   | 81 (11)                | 45 (14) <sup>14</sup> | 137 (65)         | 107 (51)              | 151 (33)          | 72 (30) <sup>21</sup> | 75 (39) <sup>17</sup> | 213 (52) <sup>16</sup> | 11 (9)                | 32 (9) <sup>12</sup> |
| <b>Median survival (months)</b>   | 7                       | 15                     | 5                     | 8                | 13                    | 35                | 12                    | 16                    | 29                     | 1                     | 14                   |
| <b>Range of survival (months)</b> | 0-120                   | 0-191                  | 137                   | 0-1              | 0-214                 | 0-113             | 0-227                 | 0-176                 | 0-183                  | 0-123                 | 0-176                |

<sup>1</sup>BLCA: data available for 123 patients; <sup>2</sup>BRCA: data available for 733 patients; <sup>3</sup>COAD: data available for 331 patients; <sup>4</sup>GBM: data available for 211 patients; <sup>5</sup>HNSC: data available for 212 patients; <sup>6</sup>KIRC: data available for 454 patients; <sup>7</sup>LUAD: data available for 237 patients; <sup>8</sup>LUSC: data available for 195 patients; <sup>9</sup>OVCA: data available for 410 patients; <sup>10</sup>READ: data available for 130 patients; <sup>11</sup>UCEC: data available for 371 patients; <sup>12</sup>data missing for 1 patient; <sup>13</sup>data missing for 2 patients; <sup>14</sup>data missing for 3 patients; <sup>15</sup>data missing for 4 patients; <sup>16</sup>data missing for 6 patients; <sup>17</sup>data missing for 8 patients; <sup>18</sup>data missing for 9 patients; <sup>19</sup>data missing for 10 patients; <sup>20</sup>data missing for 12 patients; <sup>21</sup>data missing for 16 patients

**Supplementary Table 17: Histological subtypes of BRCA, COAD, READ and UCEC**

| <b>Clinical variable</b>    | <b>Number of cases (n (%))</b> |                                 |                                      |                       |
|-----------------------------|--------------------------------|---------------------------------|--------------------------------------|-----------------------|
| <b>Tumor lineage</b>        | <b>BRCA</b>                    | <b>COAD</b>                     | <b>READ</b>                          | <b>UCEC</b>           |
| <b>Histological subtype</b> | Ductal 578 (79)                | Adenocarcinoma 292 (88)         | Adenocarcinoma 117 (92) <sup>a</sup> | Endometrioid 289 (78) |
|                             | Lobular 89 (12)                | Mucinous adenocarcinoma 39 (12) | Mucinous adenocarcinoma 10 (8)       | Serous 69 (19)        |
|                             | Medullary 4 (1)                |                                 |                                      | Mixed 13 (4)          |
|                             | Mixed 22 (3)                   |                                 |                                      |                       |
|                             | Mucinous 9 (1)                 |                                 |                                      |                       |
|                             | Other 31 (4)                   |                                 |                                      |                       |

<sup>a</sup>Data missing for 3 patients

## Supplementary Method 1: Literature and clinical trials targeting actionable proteins

Potentially actionable proteins (n = 25, Fig. 5) were selected based on a literature review<sup>44, 45, 46, 47, 48</sup> for associations with proteomic and genomic events as well as for potential ability of proteomics to identify patients likely to benefit from targeted therapies (Fig. 5a,b). There are registered phase 1 and 2 trials (clinicaltrials.gov) targeting many of the actionable proteins or their related pathways (examples in parentheses), such as pTEN<sup>49, 50</sup> (NCT01458067), HER3<sup>51</sup> (NCT01918254, NCT01482377, NCT00730470); Notch1<sup>52, 53, 54</sup> (NCT01208441, NCT01158274), TFRC67 (NCT00003082), HER2<sup>55, 56, 57, 58, 59</sup> (NCT00679341, NCT00943670, NCT00875979, NCT00005831, NCT00006089); BCL2<sup>60, 61</sup> (NCT00005032, NCT00039481, NCT00059813, NCT00063934); pSTAT3<sup>62</sup> (NCT00955812: NCT01563302, NCT01839604); cMET<sup>63</sup> (NCT01324479, NCT01523340, NCT01121575, NCT01610336; AR (NCT01889238, NCT01918306, NCT01616758); AMPK<sup>50</sup> (NCT01477060, NCT01210911, NCT01266486); BRAF (NCT00095459, NCT01266967). Some proteins have been suggested as targets in only preclinical studies so far: MYC<sup>46</sup>, FASN<sup>64, 65, 66</sup> and XRCC1<sup>67, 68, 69</sup>. ARID1A has been linked to the PI3K pathway, suggesting tumors with loss of ARID1A could potentially be sensitive to drugs targeting this pathway<sup>43</sup>. Yap<sup>70</sup>, lastly has been suggested as an interesting potential target due to its links with the WNT pathway and the EMT process.

## Supplementary Method 2: RPPA methodology

All TCGA samples were evaluated by a board-certified pathologist (H&E stained slide) for confirmation of histological diagnosis and included only if tumor purity passed a predefined threshold (that varied by tissue type) but in general greater than 70%. For TCGA inclusion, no further specific requirements were specified regarding tumor heterogeneity. To prepare the lysate, protein was extracted using RPPA lysis buffer (1% Triton X-100, 50 mmol/L Hepes (pH 7.4), 150 mmol/L NaCl, 1.5 mmol/L MgCl<sub>2</sub>, 1 mmol/L EGTA, 100 mmol/L NaF, 10 mmol/L NaPPi, 10% glycerol, 1 mmol/L phenylmethylsulfonyl fluoride, 1 mmol/L Na<sub>3</sub>VO<sub>4</sub>, and aprotinin 10 ug/mL) and Precellys homogenization from fresh frozen tumor tissue and RPPA was performed as described previously<sup>45, 71, 72, 73, 74</sup>. Concentration of the lysates was adjusted to 1 µg/µL (assessed by bicinchoninic acid assay) and boiled with 1% SDS. Tumor lysates were then serially diluted in two-fold of 5 dilutions with lysis buffer and printed on nitrocellulose-coated slides fitting 1056 samples (Grace Bio-Labs) using an Aushon Biosystems 2470 arrayer (Burlington, MA) (Supplementary Fig. S6.3). The RPPA antibody validation process, including assessment for specificity, quantification and dynamic range, was previously described<sup>75</sup> and includes the presence and density of a single and appropriately sized band on immunoblots. We use labels 'validated' and 'use with caution', based on the degree of validation by the above-mentioned criteria<sup>45</sup>. Signal was captured using a DakoCytomation-catalyzed system and DAB colorimetric reaction. Slides were scanned in CanoScan 9000F and spot intensities analyzed and quantified using Microvigene software (VigeneTech Inc., Carlisle, MA) (Level 1 data). The software SuperCurveGUI<sup>45, 71, 72</sup>, available at <http://bioinformatics.mdanderson.org/Software/supercurve/>, was used to estimate the protein EC50 values in each dilution series (log<sub>2</sub> scale). Briefly, a fitted curve ("supercurve") was plotted with the signal intensities on the Y-axis and the relative log<sub>2</sub> concentration of each protein on the X-axis using the non-parametric, monotone increasing B-spline model<sup>74</sup>. During the process, the raw spot intensity data were adjusted to correct spatial bias before model fitting. A quality control metric<sup>71</sup> was generated for each slide and the slide was discarded when the score was <0.8 (scale 0-1), followed in most cases by a new staining procedure to obtain a high quality score. The slide with the highest QC score was used for analysis (Level 2 data), if multiple slides were stained for an antibody. Protein measurements were corrected for loading as described<sup>71, 72, 76</sup> using median centering across antibodies (level 3 data). Finally, median centering across all the antibodies for each sample was used to correct for sample loading differences, which arise because protein concentrations are not uniformly distributed per unit volume, due to differences in protein concentrations of large and small cells, differences in the amount of proteins per cell, or heterogeneity of the cells comprising the samples f.e.. Differences in the total amount of protein in that sample vs. other samples can be estimated observing the expression levels across a large number of proteins from a sample. Subtracting the median protein expression level forces the median value to become zero, allowing protein expression comparison across samples<sup>77</sup>. More extensive information can be found in various articles<sup>78</sup>.

## Supplementary References

1. Cardnell RJ, *et al.* Proteomic markers of DNA repair and PI3K pathway activation predict response to the PARP inhibitor BMN 673 in small cell lung cancer. *Clinical cancer research : an official journal of the American Association for Cancer Research* **19**, 6322-6328 (2013).
2. Komurov K, White MA, Ram PT. Use of data-biased random walks on graphs for the retrieval of context-specific networks from genomic data. *PLoS computational biology* **6**, (2010).
3. Shannon P, *et al.* Cytoscape: a software environment for integrated models of biomolecular interaction networks. *Genome research* **13**, 2498-2504 (2003).
4. Igney FH, Krammer PH. Death and anti-death: tumour resistance to apoptosis. *Nature reviews Cancer* **2**, 277-288 (2002).
5. De Craene B, Berx G. Regulatory networks defining EMT during cancer initiation and progression. *Nature reviews Cancer* **13**, 97-110 (2013).
6. Katsuno Y, Lamouille S, Derynck R. TGF-beta signaling and epithelial-mesenchymal transition in cancer progression. *Current opinion in oncology* **25**, 76-84 (2013).
7. Dhillon AS, Hagan S, Rath O, Kolch W. MAP kinase signalling pathways in cancer. *Oncogene* **26**, 3279-3290 (2007).
8. Hauge C, Frodin M. RSK and MSK in MAP kinase signalling. *Journal of cell science* **119**, 3021-3023 (2006).
9. Ravichandran KS. Signaling via Shc family adapter proteins. *Oncogene* **20**, 6322-6330 (2001).
10. Stratford AL, *et al.* Y-box binding protein-1 serine 102 is a downstream target of p90 ribosomal S6 kinase in basal-like breast cancer cells. *Breast cancer research : BCR* **10**, R99 (2008).
11. Wagner EF, Nebreda AR. Signal integration by JNK and p38 MAPK pathways in cancer development. *Nature reviews Cancer* **9**, 537-549 (2009).
12. Sommer S, Fuqua SA. Estrogen receptor and breast cancer. *Seminars in cancer biology* **11**, 339-352 (2001).
13. Vermeulen K, Van Bockstaele DR, Berneman ZN. The cell cycle: a review of regulation, deregulation and therapeutic targets in cancer. *Cell proliferation* **36**, 131-149 (2003).

14. Hodgson MC, *et al.* Decreased expression and androgen regulation of the tumor suppressor gene INPP4B in prostate cancer. *Cancer research* **71**, 572-582 (2011).
15. Liu S, *et al.* Expression of autotaxin and lysophosphatidic acid receptors increases mammary tumorigenesis, invasion, and metastases. *Cancer cell* **15**, 539-550 (2009).
16. Prat A, Adamo B, Cheang MC, Anders CK, Carey LA, Perou CM. Molecular characterization of basal-like and non-basal-like triple-negative breast cancer. *The oncologist* **18**, 123-133 (2013).
17. Hynes NE, Lane HA. ERBB receptors and cancer: the complexity of targeted inhibitors. *Nature reviews Cancer* **5**, 341-354 (2005).
18. Sibilio M, Kroismayr R, Lichtenberger BM, Natarajan A, Hecking M, Holcman M. The epidermal growth factor receptor: from development to tumorigenesis. *Differentiation; research in biological diversity* **75**, 770-787 (2007).
19. Altomare DA, Testa JR. Perturbations of the AKT signaling pathway in human cancer. *Oncogene* **24**, 7455-7464 (2005).
20. Fedele CG, *et al.* Inositol polyphosphate 4-phosphatase II regulates PI3K/Akt signaling and is lost in human basal-like breast cancers. *Proceedings of the National Academy of Sciences of the United States of America* **107**, 22231-22236 (2010).
21. Vander Haar E, Lee SI, Bandhakavi S, Griffin TJ, Kim DH. Insulin signalling to mTOR mediated by the Akt/PKB substrate PRAS40. *Nature cell biology* **9**, 316-323 (2007).
22. Vivanco I, Sawyers CL. The phosphatidylinositol 3-Kinase AKT pathway in human cancer. *Nature reviews Cancer* **2**, 489-501 (2002).
23. Sancar A, Lindsey-Boltz LA, Unsal-Kacmaz K, Linn S. Molecular mechanisms of mammalian DNA repair and the DNA damage checkpoints. *Annual review of biochemistry* **73**, 39-85 (2004).
24. Treins C, Warne PH, Magnuson MA, Pende M, Downward J. Rictor is a novel target of p70 S6 kinase-1. *Oncogene* **29**, 1003-1016 (2010).
25. Valenta T, Hausmann G, Basler K. The many faces and functions of beta-catenin. *The EMBO journal* **31**, 2714-2736 (2012).
26. Liang K, *et al.* Recombinant human erythropoietin antagonizes trastuzumab treatment of breast cancer cells via Jak2-mediated Src activation and PTEN inactivation. *Cancer cell* **18**, 423-435 (2010).



27. Xia W, Liu LH, Ho P, Spector NL. Truncated ErbB2 receptor (p95ErbB2) is regulated by heregulin through heterodimer formation with ErbB3 yet remains sensitive to the dual EGFR/ErbB2 kinase inhibitor GW572016. *Oncogene* **23**, 646-653 (2004).
28. Owens DM, Keyse SM. Differential regulation of MAP kinase signalling by dual-specificity protein phosphatases. *Oncogene* **26**, 3203-3213 (2007).
29. Jie L, *et al.* The hippo-yes association protein pathway in liver cancer. *Gastroenterology research and practice* **2013**, 187070 (2013).
30. Mauviel A, Nallet-Staub F, Varelas X. Integrating developmental signals: a Hippo in the (path)way. *Oncogene* **31**, 1743-1756 (2012).
31. Kalous J, Solc P, Baran V, Kubelka M, Schultz RM, Motlik J. PKB/AKT is involved in resumption of meiosis in mouse oocytes. *Biology of the cell / under the auspices of the European Cell Biology Organization* **98**, 111-123 (2006).
32. Porter LA, Donoghue DJ. Cyclin B1 and CDK1: nuclear localization and upstream regulators. *Progress in cell cycle research* **5**, 335-347 (2003).
33. Schwegmann A, *et al.* Protein kinase C delta is essential for optimal macrophage-mediated phagosomal containment of *Listeria monocytogenes*. *Proceedings of the National Academy of Sciences of the United States of America* **104**, 16251-16256 (2007).
34. Wadsworth SJ, Goldfine H. Mobilization of protein kinase C in macrophages induced by *Listeria monocytogenes* affects its internalization and escape from the phagosome. *Infection and immunity* **70**, 4650-4660 (2002).
35. Leung TW, *et al.* Over-expression of FoxM1 stimulates cyclin B1 expression. *FEBS letters* **507**, 59-66 (2001).
36. Cammarota M, Bevilaqua LR, Medina JH, Izquierdo I. ERK1/2 and CaMKII-mediated events in memory formation: is 5HT regulation involved? *Behavioural brain research* **195**, 120-128 (2008).
37. Shiraishi K, Ascoli M. Activation of the lutropin/choriogonadotropin receptor in MA-10 cells stimulates tyrosine kinase cascades that activate ras and the extracellular signal regulated kinases (ERK1/2). *Endocrinology* **147**, 3419-3427 (2006).
38. Nawaratne R, Gray A, Jorgensen CH, Downes CP, Siddle K, Sethi JK. Regulation of insulin receptor substrate 1 pleckstrin homology domain by protein kinase C: role of serine 24 phosphorylation. *Molecular endocrinology* **20**, 1838-1852 (2006).
39. Li J, Stern DF. Regulation of CHK2 by DNA-dependent protein kinase. *The Journal of biological chemistry* **280**, 12041-12050 (2005).

40. Margariti A, *et al.* XBP1 mRNA splicing triggers an autophagic response in endothelial cells through BECLIN-1 transcriptional activation. *The Journal of biological chemistry* **288**, 859-872 (2013).
41. Yang JY, *et al.* Predicting time to ovarian carcinoma recurrence using protein markers. *The Journal of clinical investigation* **123**, 5410 (2013).
42. Aure MR, *et al.* From DNA to RNA to protein: Integrated analyses of high-throughput molecular data from primary breast carcinomas. In: *Department of genetics, institute for cancer research, the Norwegian radiumhospitalet* (ed<sup>^</sup>(eds). Thesis, Oslo university hospital and University of Oslo (2013).
43. Liang H, *et al.* Whole-exome sequencing combined with functional genomics reveals novel candidate driver cancer genes in endometrial cancer. *Genome research* **22**, 2120-2129 (2012).
44. Heiser LM, *et al.* Subtype and pathway specific responses to anticancer compounds in breast cancer. *Proceedings of the National Academy of Sciences of the United States of America* **109**, 2724-2729 (2012).
45. Hennessy BT, *et al.* Pharmacodynamic markers of perifosine efficacy. *Clinical cancer research : an official journal of the American Association for Cancer Research* **13**, 7421-7431 (2007).
46. Horiuchi D, *et al.* MYC pathway activation in triple-negative breast cancer is synthetic lethal with CDK inhibition. *The Journal of experimental medicine* **209**, 679-696 (2012).
47. Kim N, *et al.* Systematic analysis of genotype-specific drug responses in cancer. *International journal of cancer Journal international du cancer* **131**, 2456-2464 (2012).
48. Park ES, *et al.* Integrative analysis of proteomic signatures, mutations, and drug responsiveness in the NCI 60 cancer cell line set. *Molecular cancer therapeutics* **9**, 257-267 (2010).
49. Gonzalez-Angulo AM, Blumenschein GR, Jr. Defining biomarkers to predict sensitivity to PI3K/Akt/mTOR pathway inhibitors in breast cancer. *Cancer treatment reviews* **39**, 313-320 (2013).
50. Slomovitz BM, Coleman RL. The PI3K/AKT/mTOR pathway as a therapeutic target in endometrial cancer. *Clinical cancer research : an official journal of the American Association for Cancer Research* **18**, 5856-5864 (2012).

51. Desai MD, Saroya BS, Lockhart AC. Investigational therapies targeting the ErbB (EGFR, HER2, HER3, HER4) family in GI cancers. *Expert opinion on investigational drugs* **22**, 341-356 (2013).
52. McAuliffe SM, *et al.* Targeting Notch, a key pathway for ovarian cancer stem cells, sensitizes tumors to platinum therapy. *Proceedings of the National Academy of Sciences of the United States of America* **109**, E2939-2948 (2012).
53. Strosberg JR, *et al.* A phase II study of R04929097 in metastatic colorectal cancer. *European journal of cancer* **48**, 997-1003 (2012).
54. Tolcher AW, *et al.* Phase I study of R04929097, a gamma secretase inhibitor of Notch signaling, in patients with refractory metastatic or locally advanced solid tumors. *Journal of clinical oncology : official journal of the American Society of Clinical Oncology* **30**, 2348-2353 (2012).
55. Ballantyne A, Dhillon S. Trastuzumab emtansine: first global approval. *Drugs* **73**, 755-765 (2013).
56. Barginear MF, John V, Budman DR. Trastuzumab-DM1: a clinical update of the novel antibody-drug conjugate for HER2-overexpressing breast cancer. *Molecular medicine* **18**, 1473-1479 (2012).
57. Fleming GF, *et al.* Phase II trial of trastuzumab in women with advanced or recurrent, HER2-positive endometrial carcinoma: a Gynecologic Oncology Group study. *Gynecologic oncology* **116**, 15-20 (2010).
58. Verma S, *et al.* Trastuzumab emtansine for HER2-positive advanced breast cancer. *The New England journal of medicine* **367**, 1783-1791 (2012).
59. Wulfing C, *et al.* A single-arm, multicenter, open-label phase 2 study of lapatinib as the second-line treatment of patients with locally advanced or metastatic transitional cell carcinoma. *Cancer* **115**, 2881-2890 (2009).
60. Hall C, Troutman SM, Price DK, Figg WD, Kang MH. Bcl-2 family of proteins as therapeutic targets in genitourinary neoplasms. *Clinical genitourinary cancer* **11**, 10-19 (2013).
61. Ott PA, *et al.* Oblimersen in combination with temozolomide and albumin-bound paclitaxel in patients with advanced melanoma: a phase I trial. *Cancer chemotherapy and pharmacology* **71**, 183-191 (2013).
62. Zhao M, Jiang B, Gao FH. Small molecule inhibitors of STAT3 for cancer therapy. *Current medicinal chemistry* **18**, 4012-4018 (2011).

63. Robinson KW, Sandler AB. The role of MET receptor tyrosine kinase in non-small cell lung cancer and clinical development of targeted anti-MET agents. *The oncologist* **18**, 115-122 (2013).
64. Jin Q, *et al.* Fatty acid synthase phosphorylation: a novel therapeutic target in HER2-overexpressing breast cancer cells. *Breast cancer research : BCR* **12**, R96 (2010).
65. Luo DX, *et al.* Targeting acetyl-CoA carboxylases: small molecular inhibitors and their therapeutic potential. *Recent patents on anti-cancer drug discovery* **7**, 168-184 (2012).
66. Pandey PR, Liu W, Xing F, Fukuda K, Watabe K. Anti-cancer drugs targeting fatty acid synthase (FAS). *Recent patents on anti-cancer drug discovery* **7**, 185-197 (2012).
67. Abdel-Fatah T, *et al.* Clinicopathological and functional significance of XRCC1 expression in ovarian cancer. *International journal of cancer Journal international du cancer* **132**, 2778-2786 (2013).
68. Ang MK, *et al.* High XRCC1 protein expression is associated with poorer survival in patients with head and neck squamous cell carcinoma. *Clinical cancer research : an official journal of the American Association for Cancer Research* **17**, 6542-6552 (2011).
69. Sultana R, *et al.* Targeting XRCC1 deficiency in breast cancer for personalized therapy. *Cancer research* **73**, 1621-1634 (2013).
70. Piccolo S, Cordenonsi M, Dupont S. Molecular Pathways: YAP and TAZ Take Center Stage in Organ Growth and Tumorigenesis. *Clinical cancer research : an official journal of the American Association for Cancer Research*, (2013).
71. Coombes KR. ClassDiscovery: Classes and methods for "class discovery" with microarrays or proteomics. R package version 2.13.4. (ed<sup>^</sup>(eds) (2012).
72. Hu J, He X, Baggerly KA, Coombes KR, Hennessy BT, Mills GB. Non-parametric quantification of protein lysate arrays. *Bioinformatics* **23**, 1986-1994 (2007).
73. Liang J, *et al.* The energy sensing LKB1-AMPK pathway regulates p27(kip1) phosphorylation mediating the decision to enter autophagy or apoptosis. *Nature cell biology* **9**, 218-224 (2007).
74. Tibes R, *et al.* Reverse phase protein array: validation of a novel proteomic technology and utility for analysis of primary leukemia specimens and hematopoietic stem cells. *Molecular cancer therapeutics* **5**, 2512-2521 (2006).

75. Hennessy BT, *et al.* A Technical Assessment of the Utility of Reverse Phase Protein Arrays for the Study of the Functional Proteome in Non-microdissected Human Breast Cancers. *Clinical proteomics* **6**, 129-151 (2010).
76. Gonzalez-Angulo AM, *et al.* Functional proteomics can define prognosis and predict pathologic complete response in patients with breast cancer. *Clinical proteomics* **8**, 11 (2011).
77. Neeley ES, Kornblau SM, Coombes KR, Baggerly KA. Variable slope normalization of reverse phase protein arrays. *Bioinformatics* **25**, 1384-1389 (2009).
78. Cancer Genome Atlas Research N. Comprehensive molecular characterization of clear cell renal cell carcinoma. *Nature* **499**, 43-49 (2013).
